# Supplementary material
Source: publisher figshare collection journal article supplement (https://acs.figshare.com/ndownloader/files/8823247)

# **SUPPORTING INFORMATION**

## **Vanadium-Catalyzed Oxidative C(CO)–C(CO) Bond Cleavage for C–N Bond Formation: One Pot Domino Transformation of 1,2-Diketones and Amidines into Imides and Amides**

Chander Singh Digwal, Upasana Yadav, P. V. Sri Ramya, Sravani Sana, Baijayantimala Swain, and Ahmed Kamal\*

Department of Medicinal Chemistry, National Institute of Pharmaceutical Education and Research (NIPER), Balanagar, Hyderabad 500037, India.

### Table of contents

|      |                                                                                                                           |    |
|------|---------------------------------------------------------------------------------------------------------------------------|----|
| I.   | Table S1 (screening of the catalysts).....                                                                                | S3 |
| II.  | Table S2 (screening of the solvent).....                                                                                  | S4 |
| III. | Control Experiments.....                                                                                                  | S5 |
| IV.  | Color change during the reaction of <b>1a</b> with <b>2aa</b> .....                                                       | S6 |
| V.   | <sup>1</sup> H NMR and <sup>13</sup> C NMR Spectra copies of Compounds <b>3a</b> , <b>4</b> , <b>5</b> and <b>6</b> ..... | S7 |

**I. Table S1:** The screening of metal catalyst for the reaction of benzil (**1a**) and *N*-phenylbenzimidamide (**2aa**)<sup>a</sup>

Reaction scheme: Benzil (**1a**) + *N*-phenylbenzimidamide (**2aa**)  $\xrightarrow[\text{air, rt, 48 h}]{\text{Cat. (20 mol \%), H}_2\text{O (5 equiv.), DMF}}$  [Intermediate **3a**]  $\rightarrow$  Product **4aa** + Product **5a**

| Entry           | Cat. (20 mol%)                                       | Yield of products (%) <sup>b</sup> |            |           | Recovery of <b>1a</b> (%) |
|-----------------|------------------------------------------------------|------------------------------------|------------|-----------|---------------------------|
|                 |                                                      | <b>3a</b>                          | <b>4aa</b> | <b>5a</b> |                           |
| 1               | none                                                 | 0                                  | 0          | 0         | 98                        |
| 2               | Cu(NO <sub>3</sub> ) <sub>2</sub> ·xH <sub>2</sub> O | 0                                  | 0          | 0         | 96                        |
| 3               | CuSO <sub>4</sub> ·5H <sub>2</sub> O                 | 0                                  | 0          | 0         | 94                        |
| 4               | Cu(OAc) <sub>2</sub> ·H <sub>2</sub> O               | 26                                 | 0          | 0         | 67                        |
| 5               | CuCl <sub>2</sub> ·2H <sub>2</sub> O                 | 38                                 | 0          | 0         | 55                        |
| 6               | CuBr                                                 | 47                                 | 0          | 0         | 48                        |
| 7               | CuI                                                  | 55                                 | 0          | 0         | 40                        |
| 8               | Cu(OTf) <sub>2</sub>                                 | 52                                 | 21         | 22        | 18                        |
| 9 <sup>c</sup>  | Cu(OTf) <sub>2</sub>                                 | 50                                 | 24         | 25        | 10                        |
| 10 <sup>d</sup> | Cu(OTf) <sub>2</sub>                                 | 48                                 | 27         | 28        | 15                        |
| 10 <sup>e</sup> | Cu(OTf) <sub>2</sub>                                 | 45                                 | 10         | 12        | 16                        |
| 11              | AgOTf                                                | trace                              | 0          | 0         | n.d.                      |
| 12              | Ag <sub>2</sub> CO <sub>3</sub>                      | 0                                  | 0          | 0         | n.d.                      |
| 13              | AgNO <sub>3</sub>                                    | 0                                  | 0          | 0         | n.d.                      |
| 14              | In(OTf) <sub>3</sub>                                 | 0                                  | 0          | 0         | n.d.                      |
| 15              | Zn(OTf) <sub>2</sub>                                 | 0                                  | 0          | 0         | n.d.                      |
| 16              | Sc(OTf) <sub>3</sub>                                 | trace                              | 0          | 0         | n.d.                      |
| 17              | FeCl <sub>3</sub>                                    | trace                              | 0          | 0         | n.d.                      |

<sup>a</sup>A mixture of **1a** (0.5 mmol), **2aa** (0.6 mmol), H<sub>2</sub>O (45 μL) and 20 mol% catalyst in dry DMF (3 mL) was stirred at room temperature for 48 h under air. <sup>b</sup>Isolated yields of products based on **1a**. <sup>c</sup>The reaction was run for 96 h. <sup>d</sup>The reaction was carried out with 50 mol% of Cu(OTf)<sub>2</sub>. <sup>e</sup>The reaction was conducted at 80 °C. n.d.: not determined.

**II. Table S2.** The screening of solvent<sup>a</sup>

Reaction scheme: **1a** + **2aa**  $\xrightarrow[\text{solvent, air, 70 } ^\circ\text{C, 20 h}]{\text{VOSO}_4 \text{ (20 mol\%)}}$  **3a**  $\longrightarrow$  **4aa** + **5a**

| Entry           | Solvent            | H <sub>2</sub> O (equiv.) | Yield of products (%) <sup>b</sup> |            |           |
|-----------------|--------------------|---------------------------|------------------------------------|------------|-----------|
|                 |                    |                           | <b>3a</b>                          | <b>4aa</b> | <b>5a</b> |
| 1               | n-hexane           | -                         | 0                                  | 0          | 0         |
| 2               | toluene            | -                         | 8                                  | 0          | 0         |
| 3               | 1,4-dioxane        | -                         | trace                              | 0          | 0         |
| 4               | DCM                | -                         | 0                                  | 0          | 0         |
| 5               | DCE                | -                         | trace                              | 0          | 0         |
| 6               | ethyl acetate      | -                         | trace                              | 0          | 0         |
| 7               | acetone            | H <sub>2</sub> O (5)      | 25                                 | trace      | trace     |
| 8               | ethanol            | H <sub>2</sub> O (5)      | trace                              | 0          | 0         |
| 9               | THF                | H <sub>2</sub> O (5)      | 32                                 | trace      | trace     |
| 10 <sup>c</sup> | CH <sub>3</sub> CN | H <sub>2</sub> O (5)      | 0                                  | 76         | 80        |
| 11 <sup>d</sup> | DMSO               | H <sub>2</sub> O (5)      | 0                                  | 82         | 88        |
| 12 <sup>e</sup> | DMA                | H <sub>2</sub> O (5)      | 0                                  | 85         | 84        |

<sup>a</sup>A mixture of **1a** (0.5 mmol), **2aa** (0.6 mmol) and 20 mol% VOSO<sub>4</sub>·xH<sub>2</sub>O in solvent (3 mL) was stirred at 70 °C for 20 h under air. <sup>b</sup>Isolated yields of products based on **1a**.

<sup>c</sup>The reaction was run for 48 h. <sup>d</sup>The reaction was run for 36 h. <sup>e</sup>The reaction was run for 32 h.

### III. Control experiments

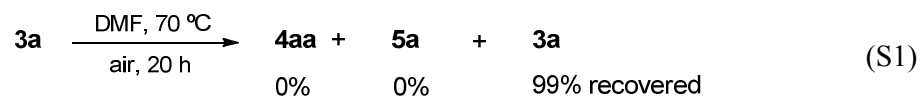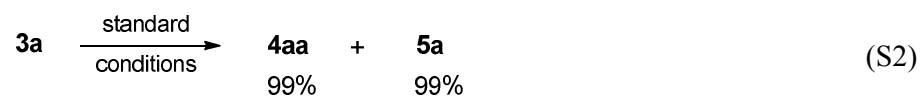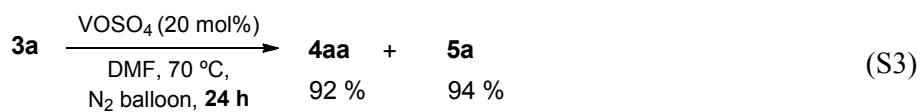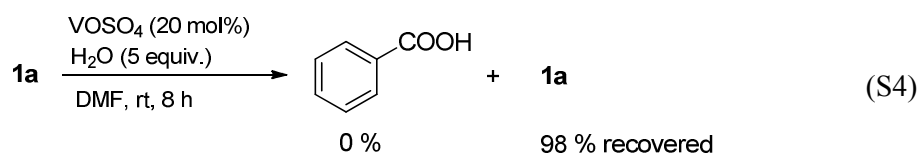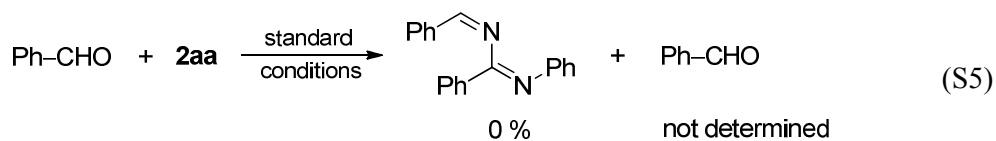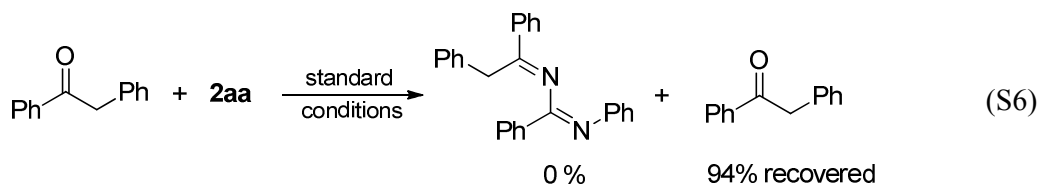

#### IV. Colour change during the reaction of benzil (1a) with N-phenylbenzimidamide (2aa):

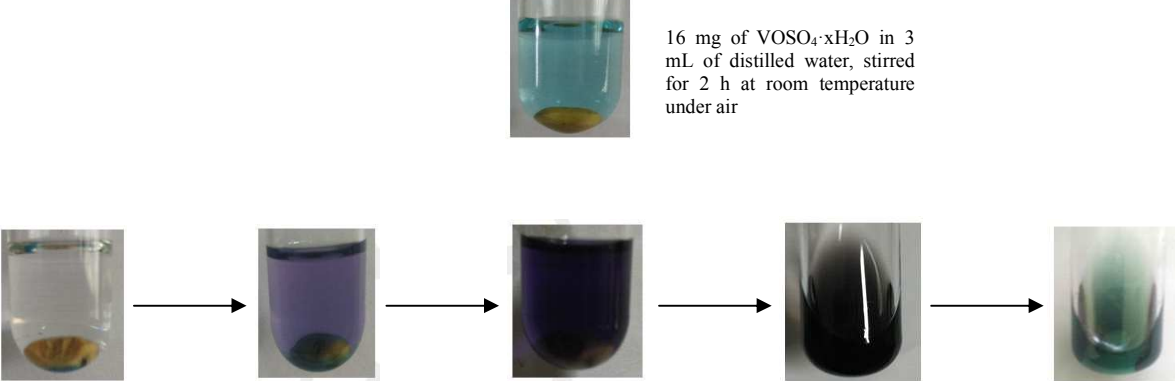

16 mg of  $\text{VOSO}_4 \cdot x\text{H}_2\text{O}$  in 3 mL of distilled water, stirred for 2 h at room temperature under air

16 mg of  $\text{VOSO}_4 \cdot x\text{H}_2\text{O}$  and  $\text{H}_2\text{O}$  (45  $\mu\text{L}$ ) in 3 mL dry DMF

After 1 h of stirring at room temperature under air

After 2 h

On addition of **1a** and **2aa**

After 8 h

#### Note:

Whenever a mixture of 1,2-diketone, amidine,  $\text{H}_2\text{O}$  and 20 mol% of  $\text{VOSO}_4 \cdot x\text{H}_2\text{O}$  in dry DMF was heated at 70  $^\circ\text{C}$ , the color of the reaction mixture turned black within 1 h, which then turned to green in most of the cases.

v.  $^1\text{H}$ - and  $^{13}\text{C}$ -NMR spectra copies of compounds **3a**, **4**, **5** and **6**

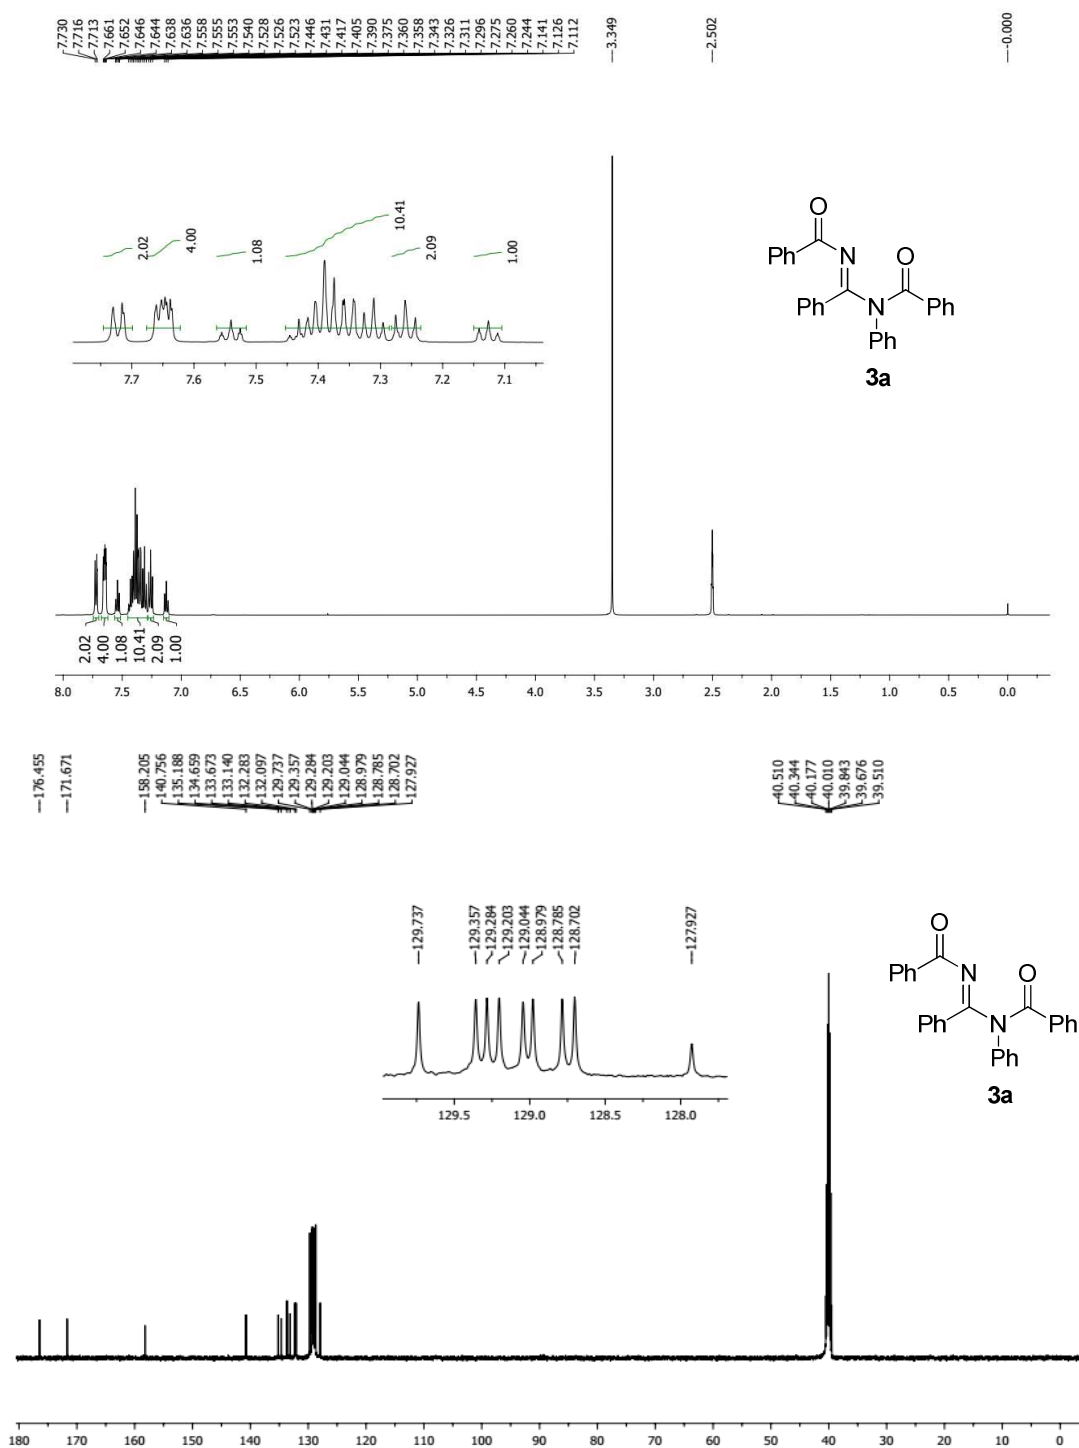

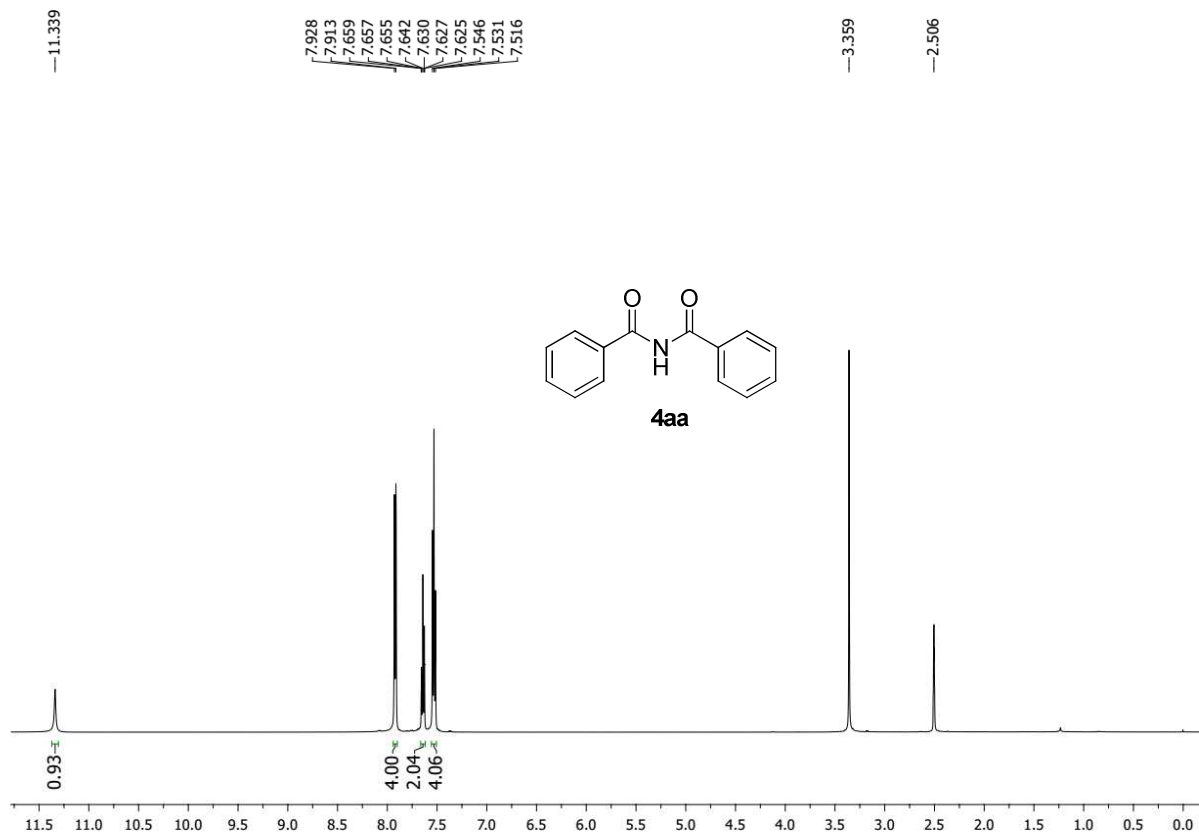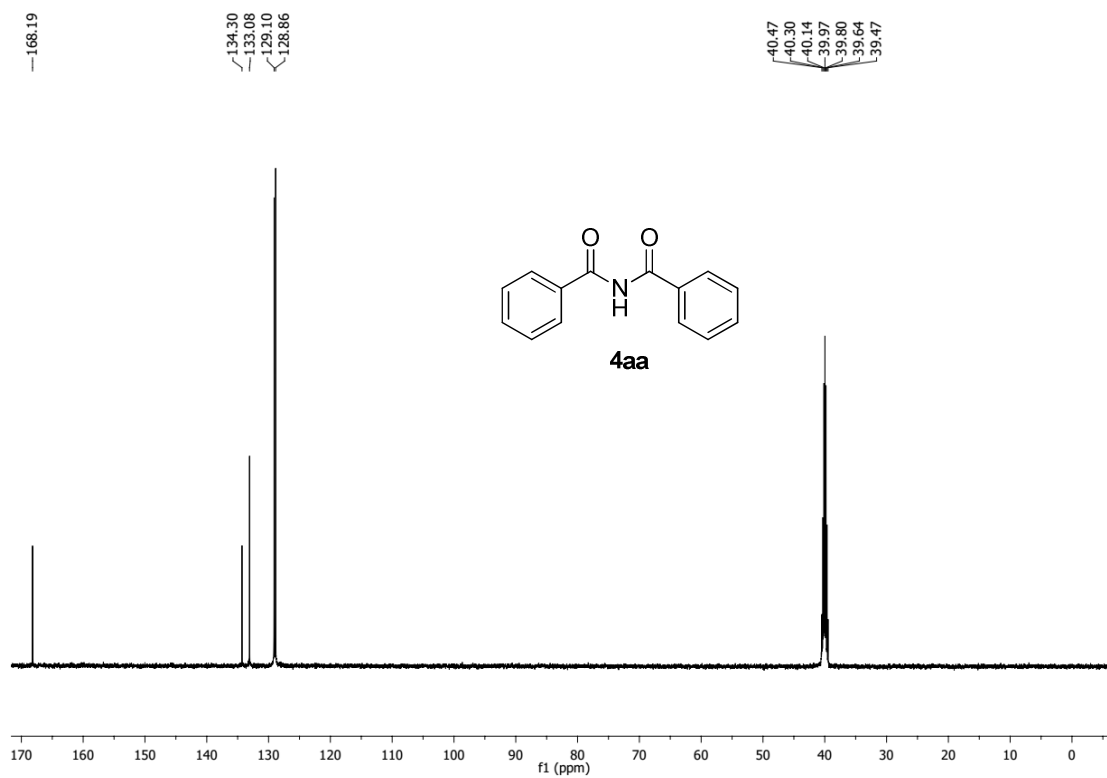



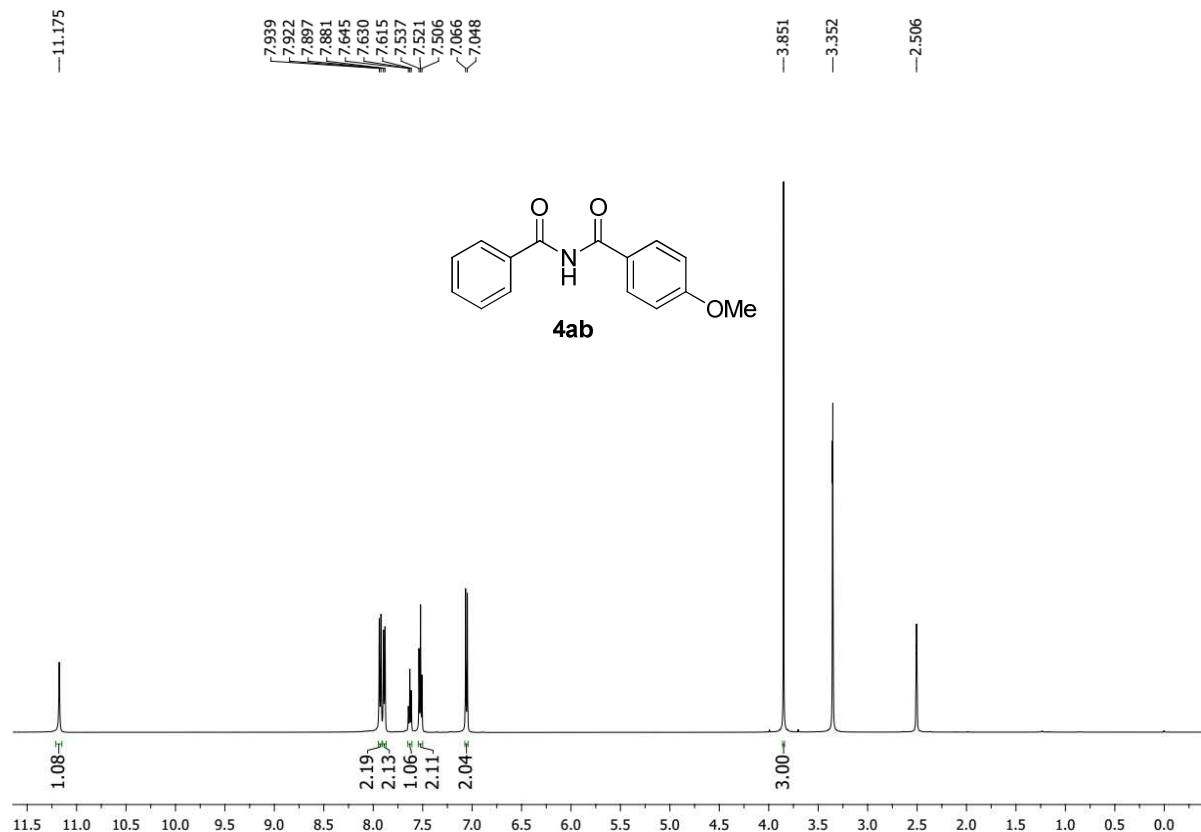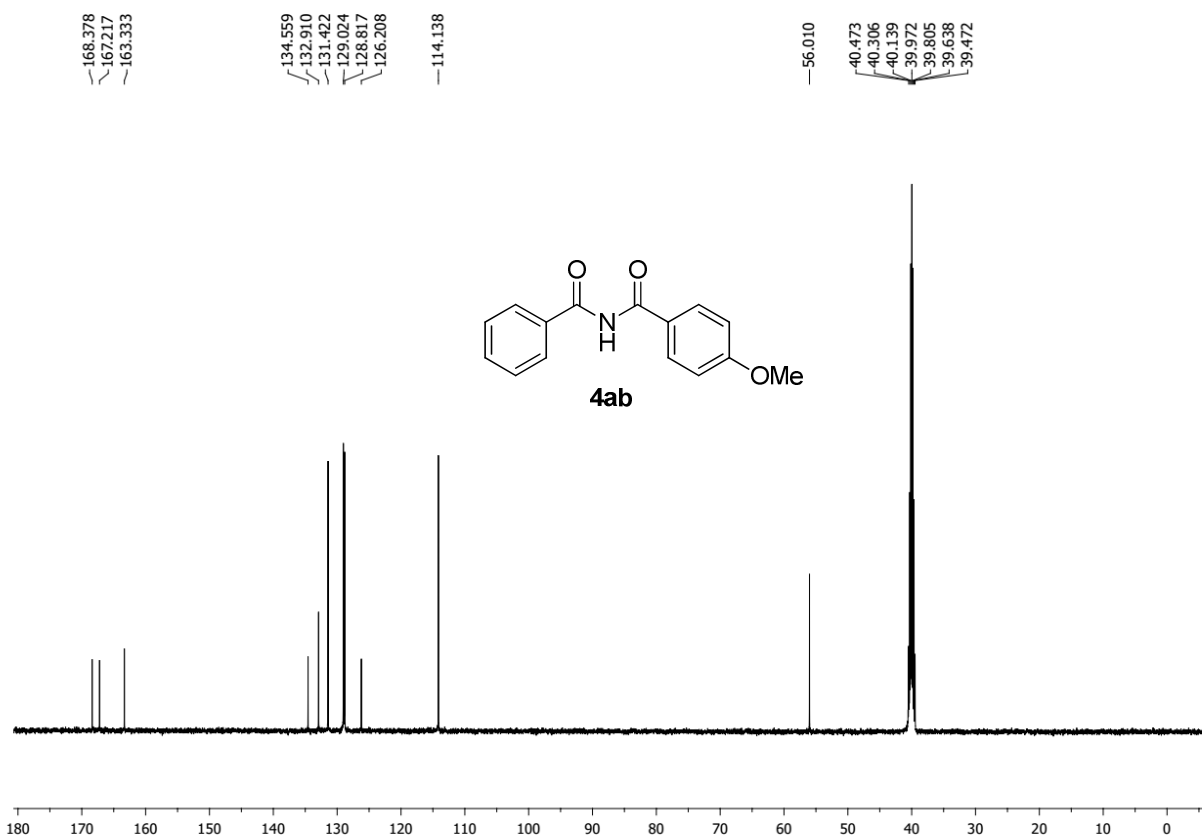

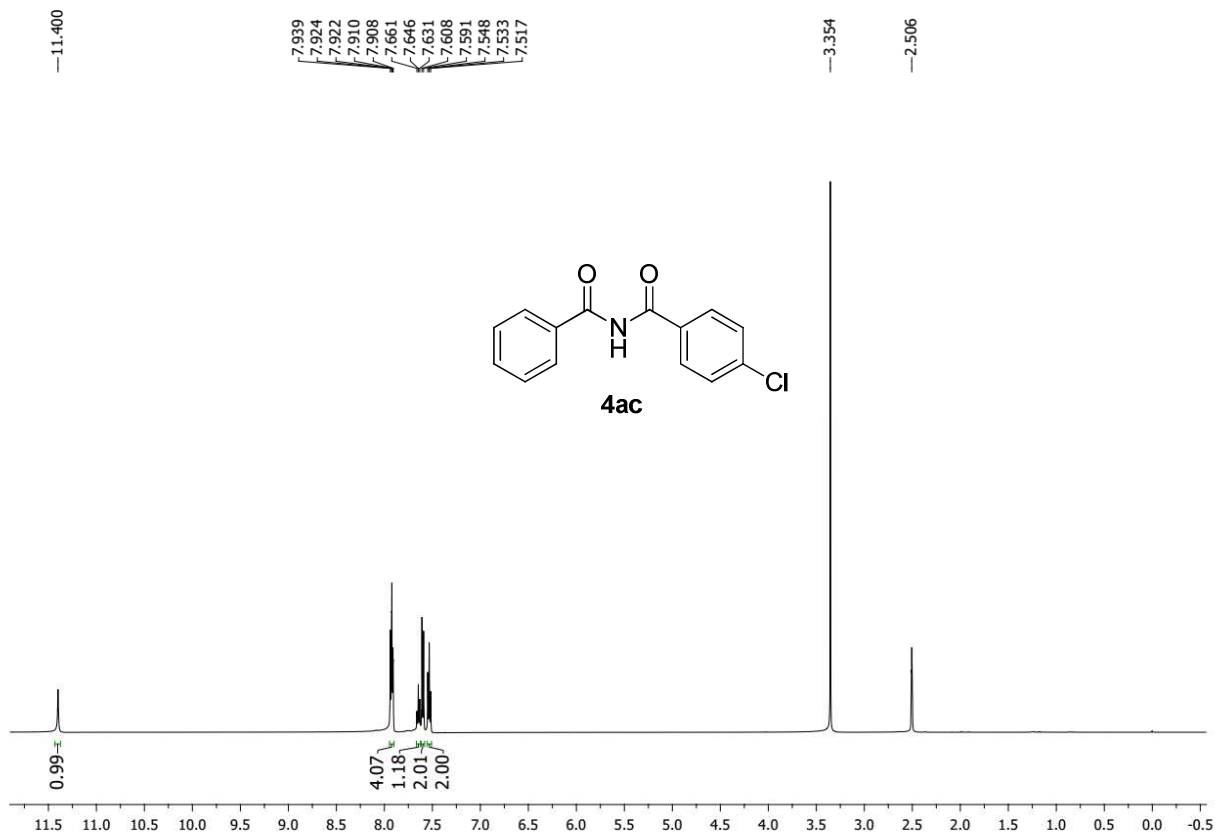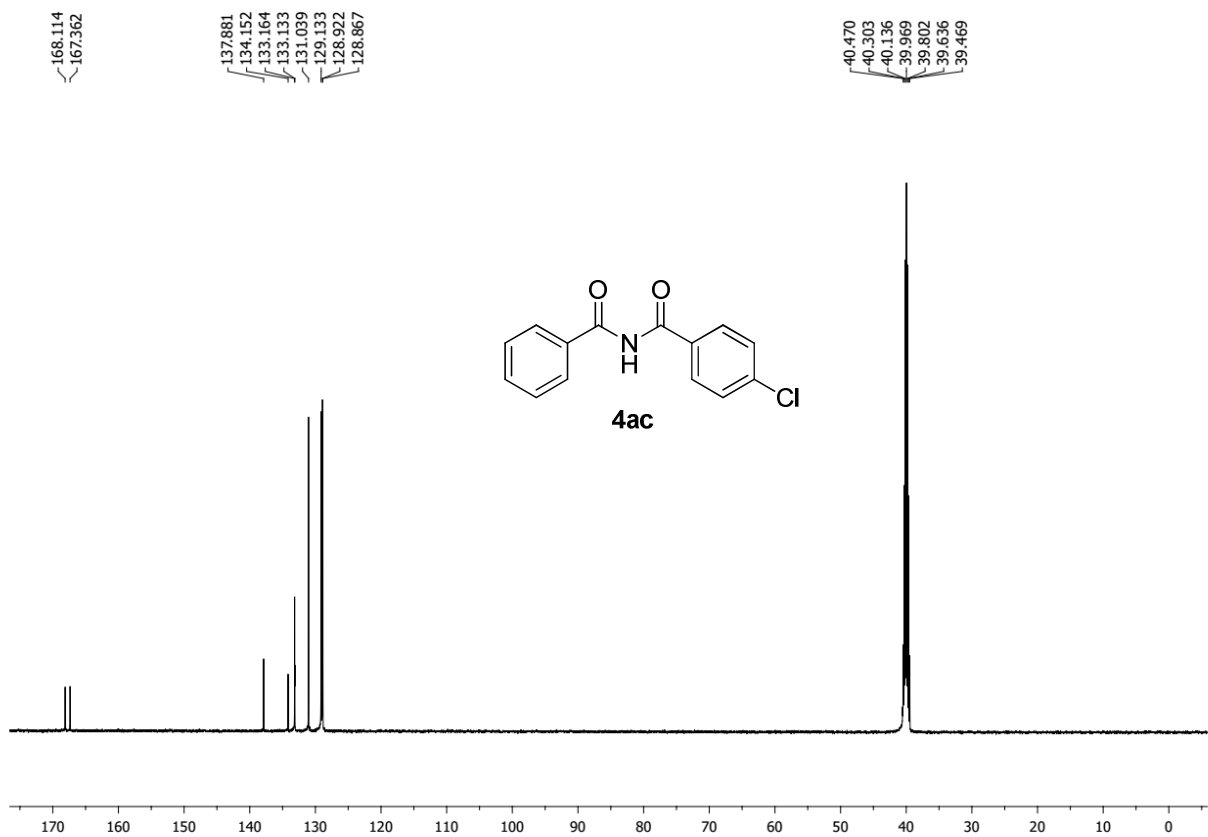

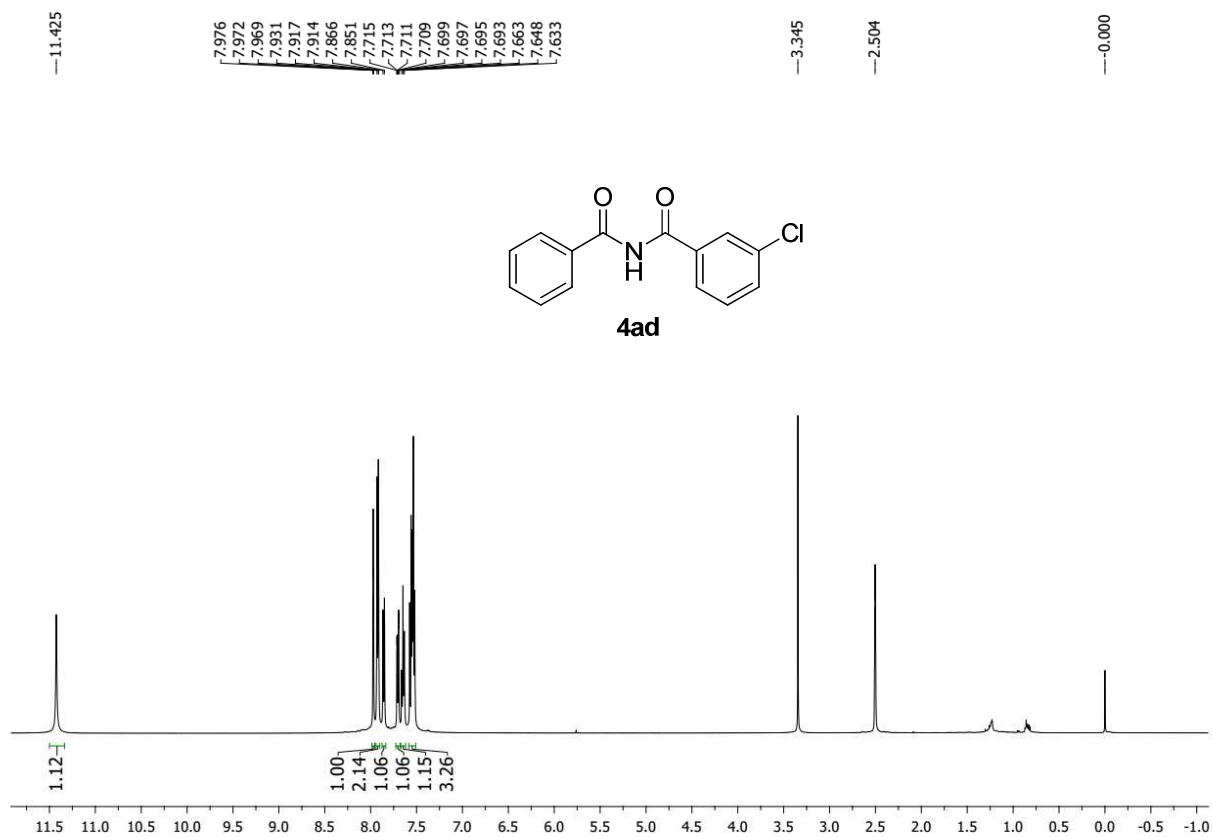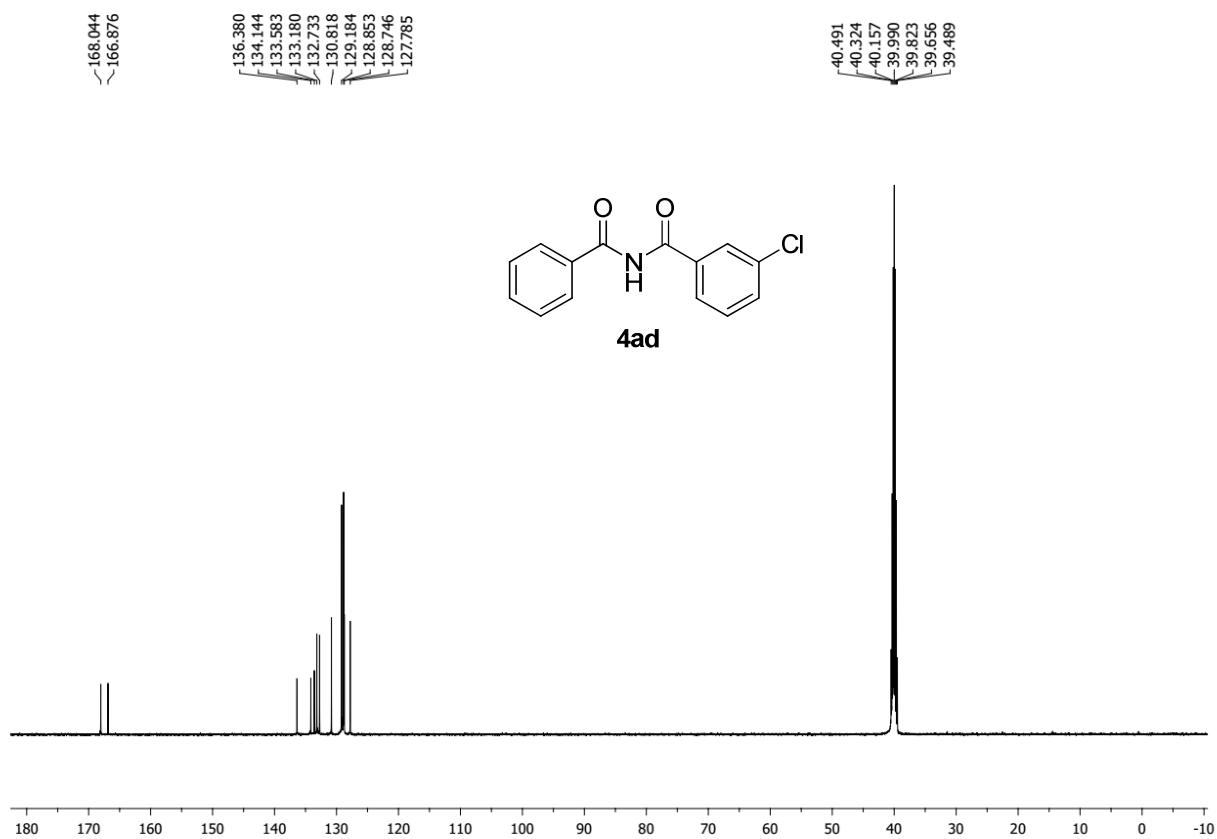

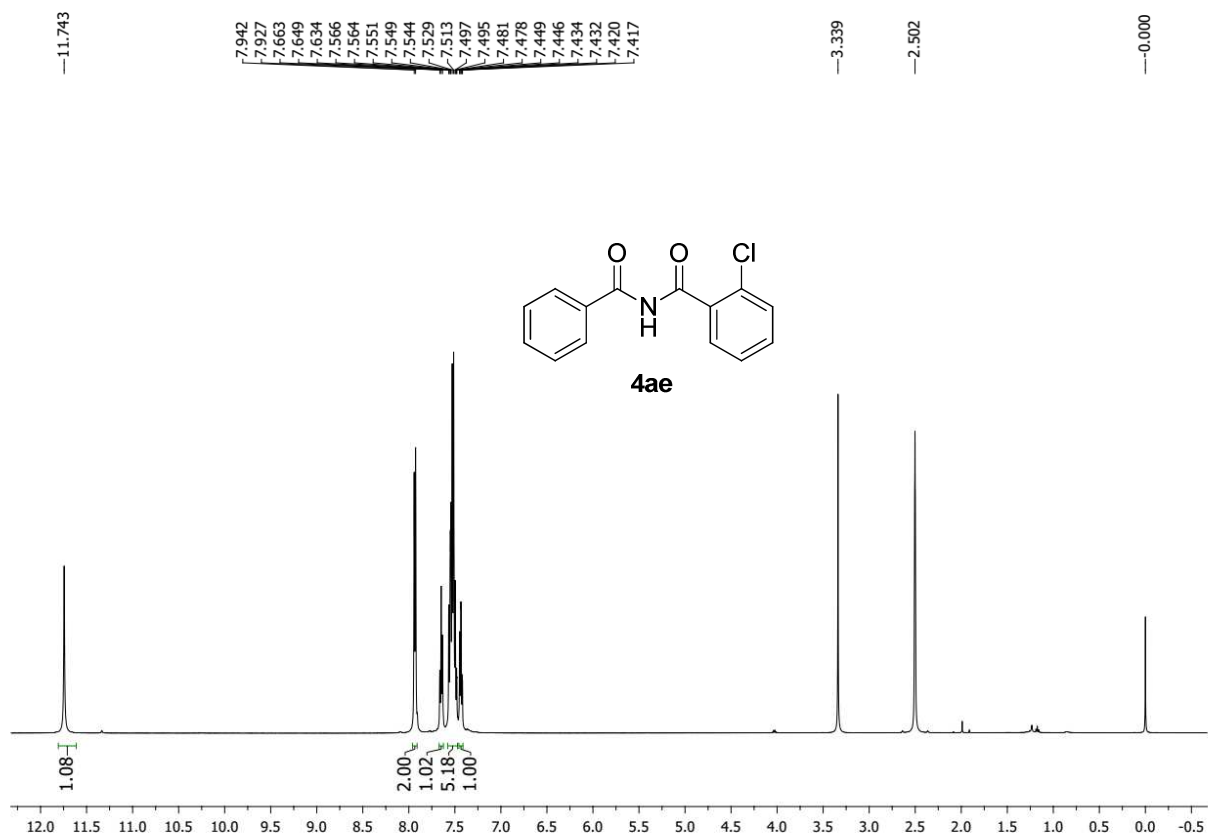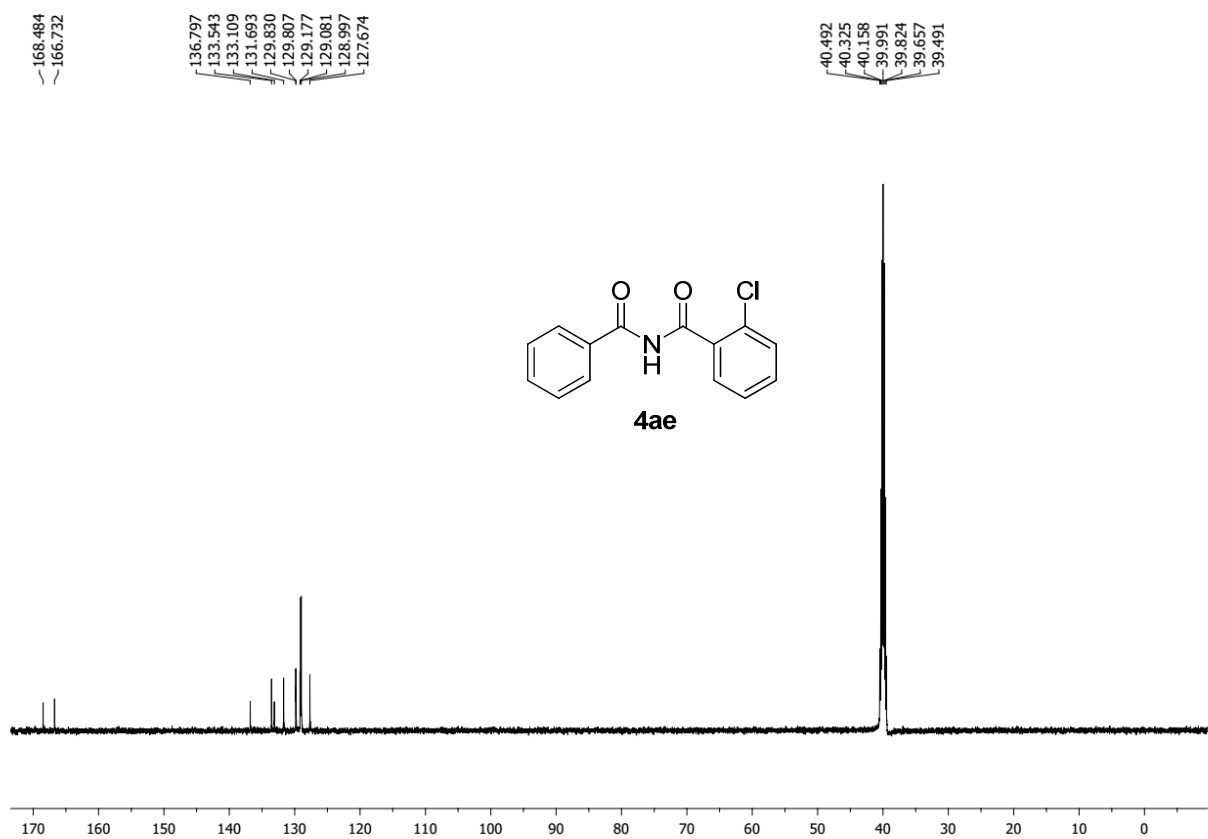

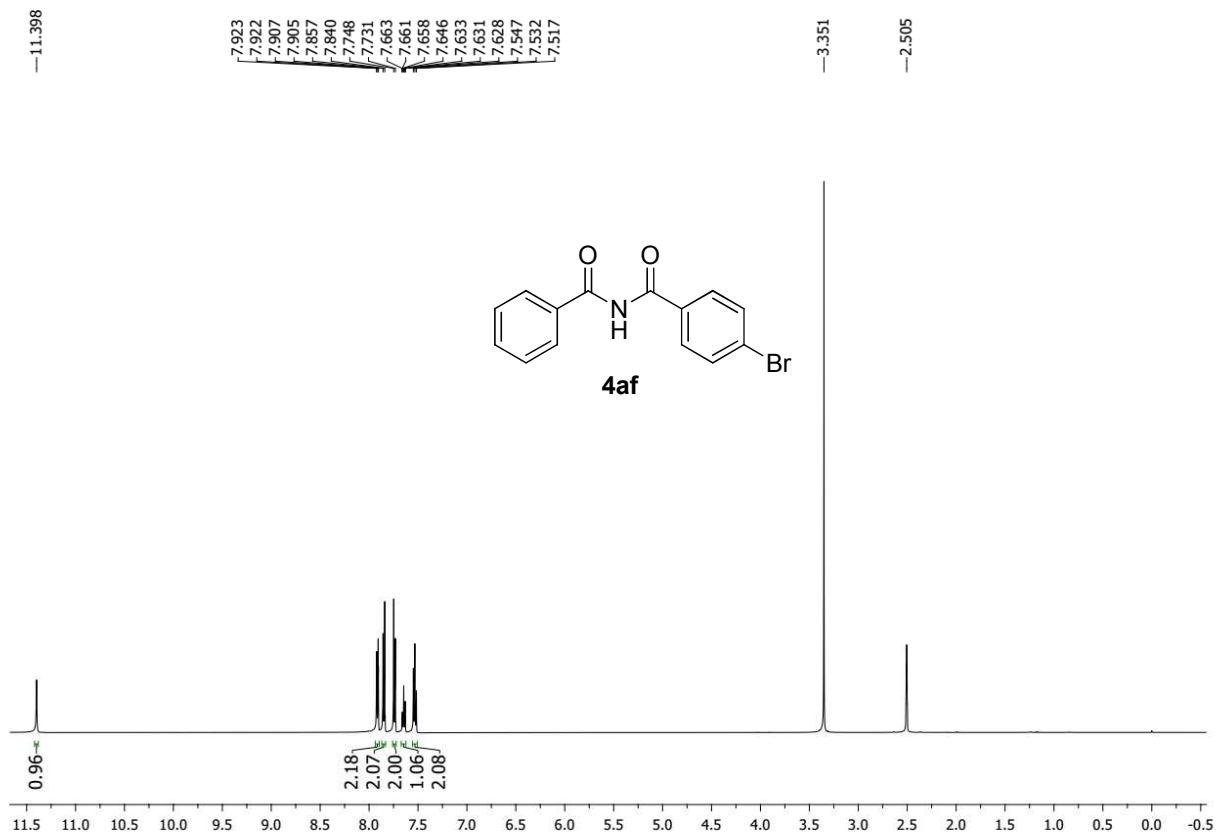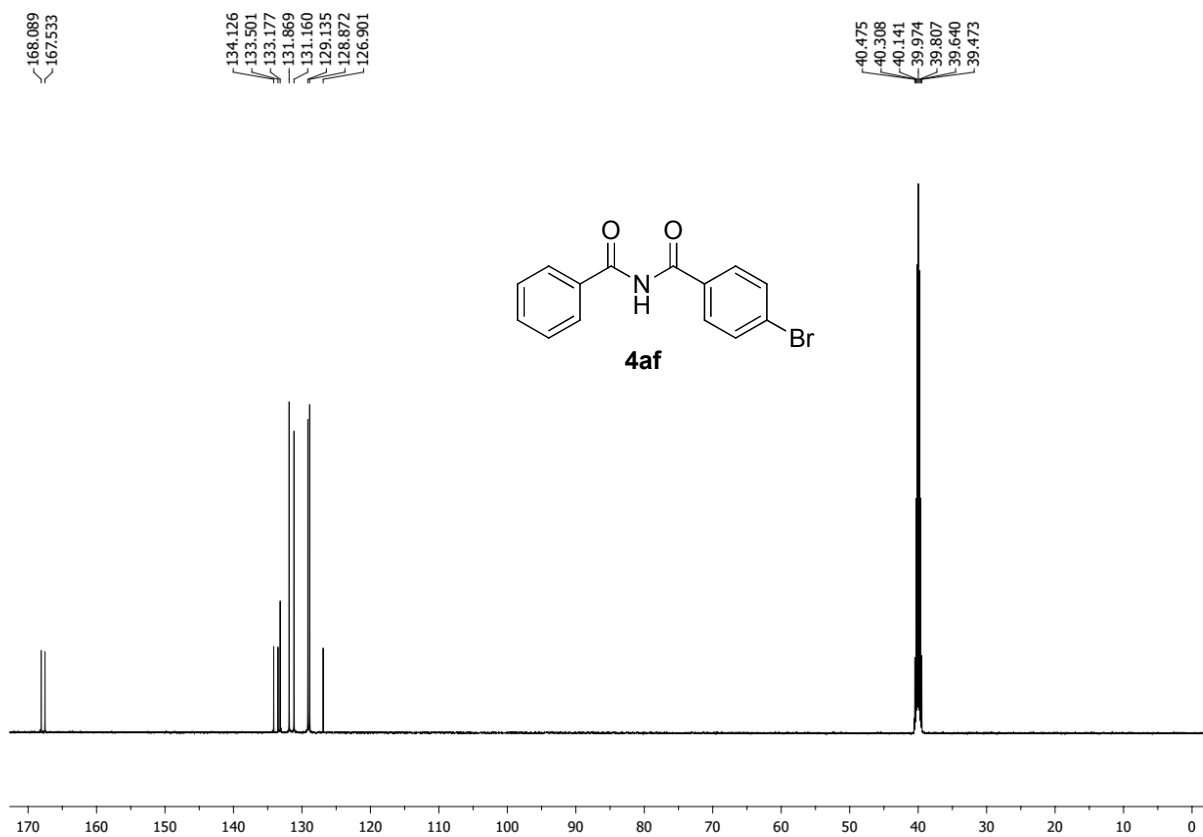

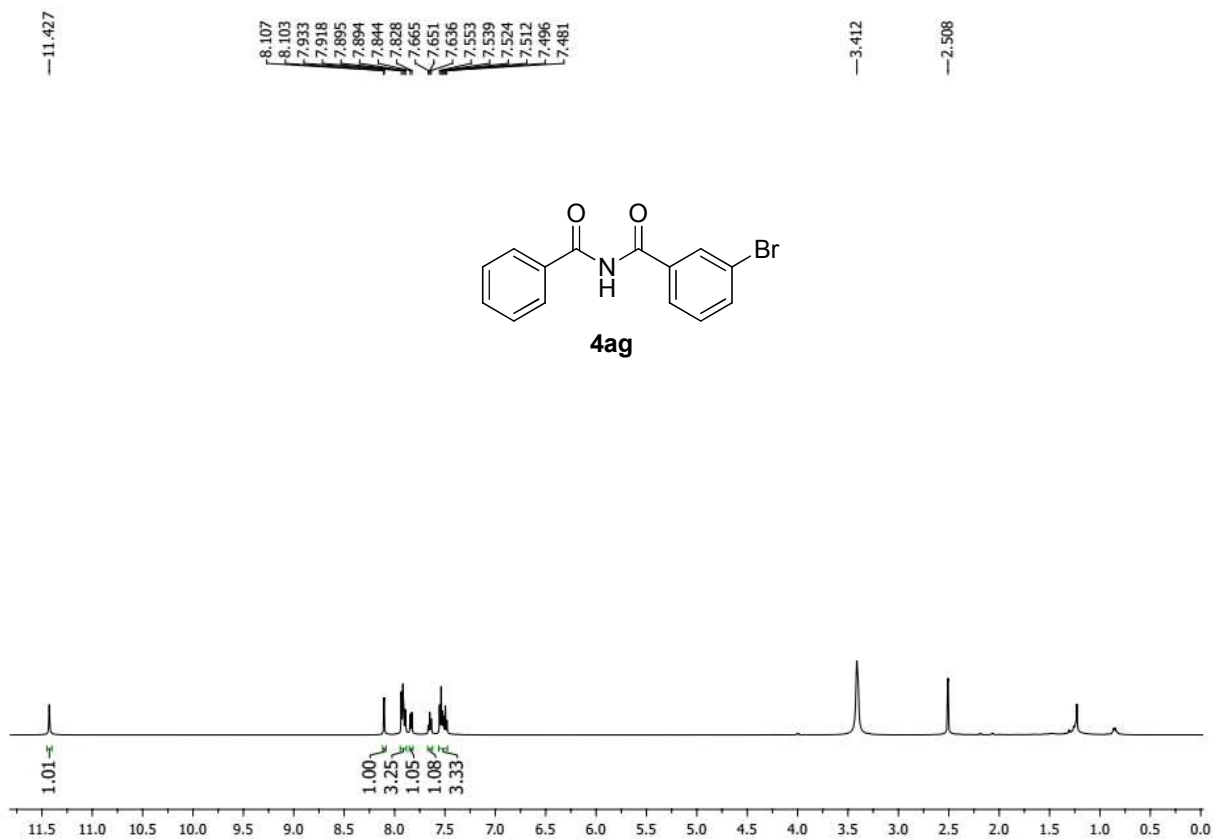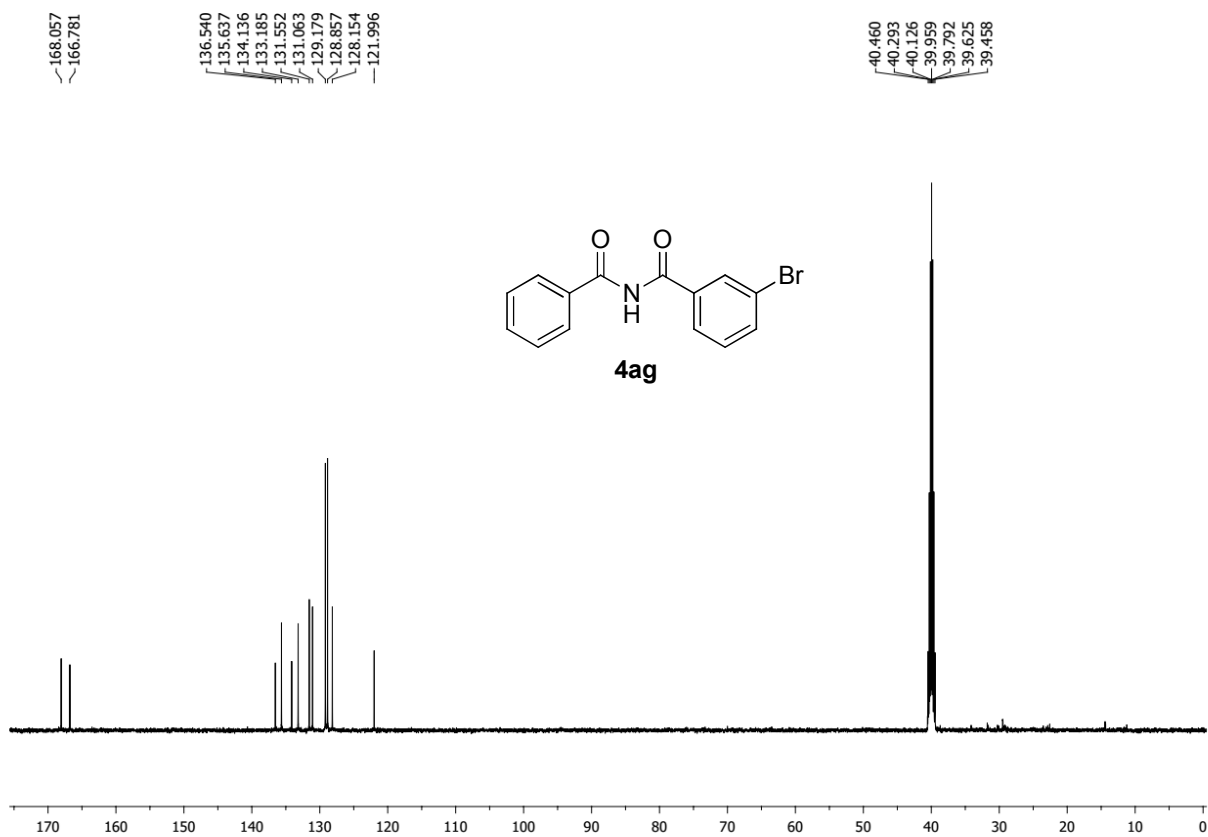

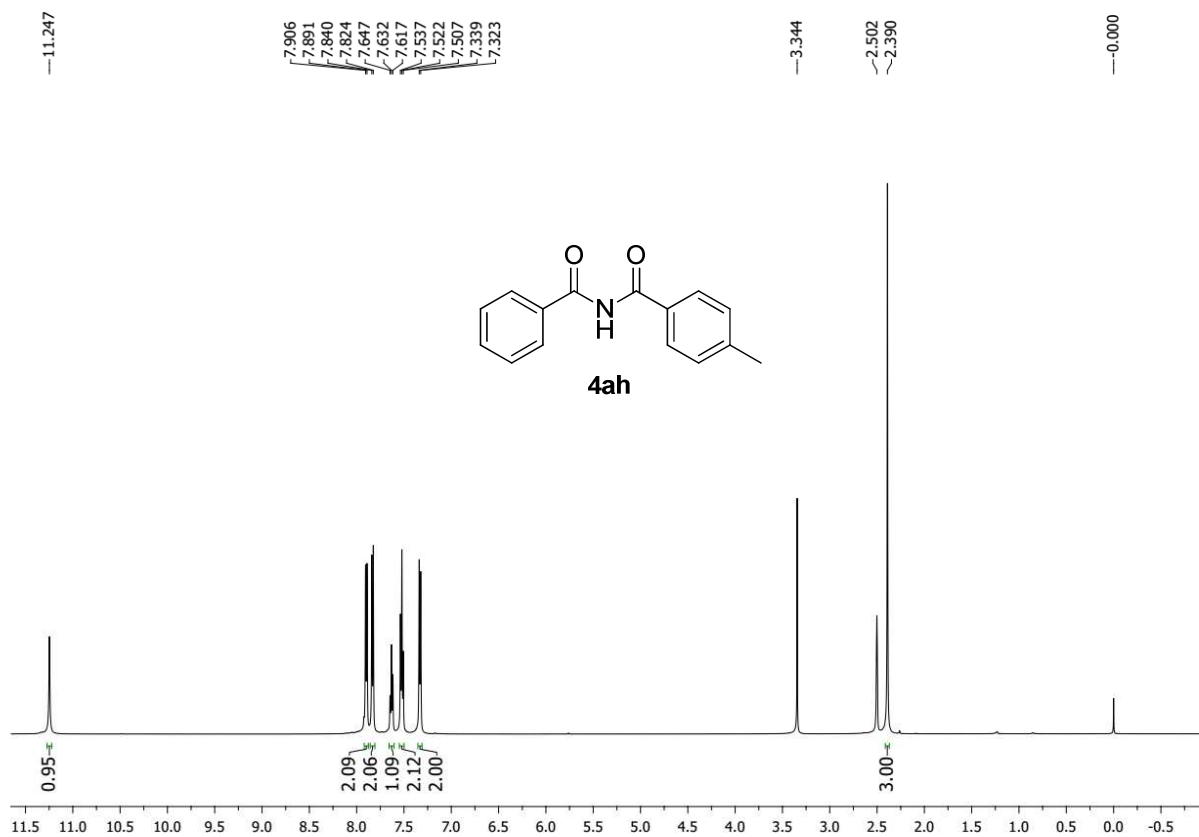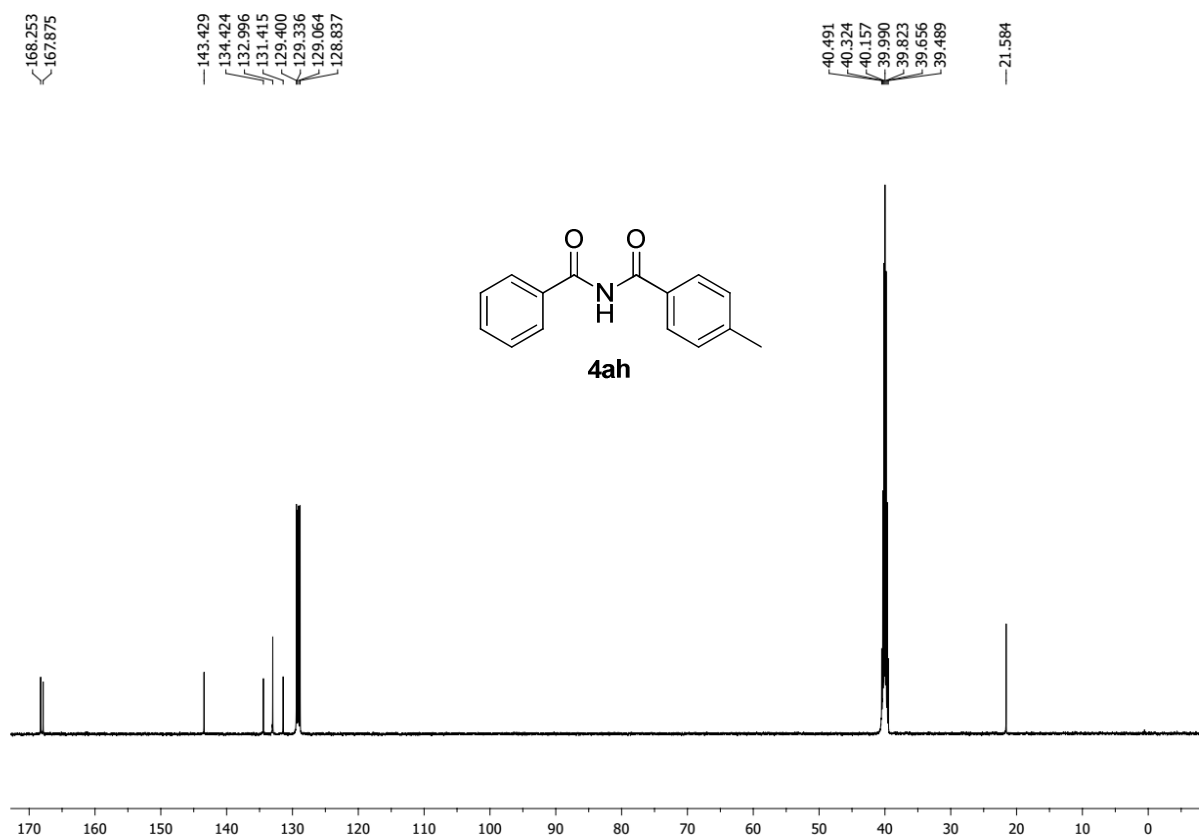

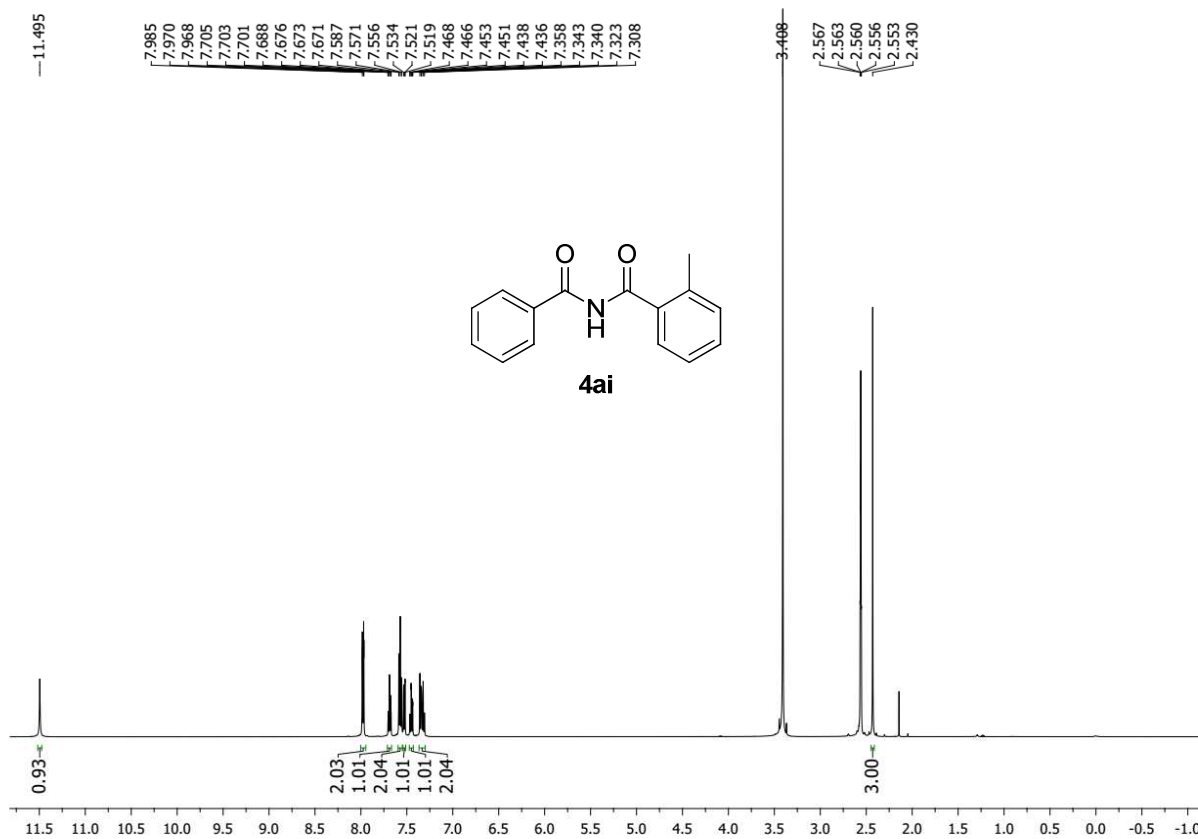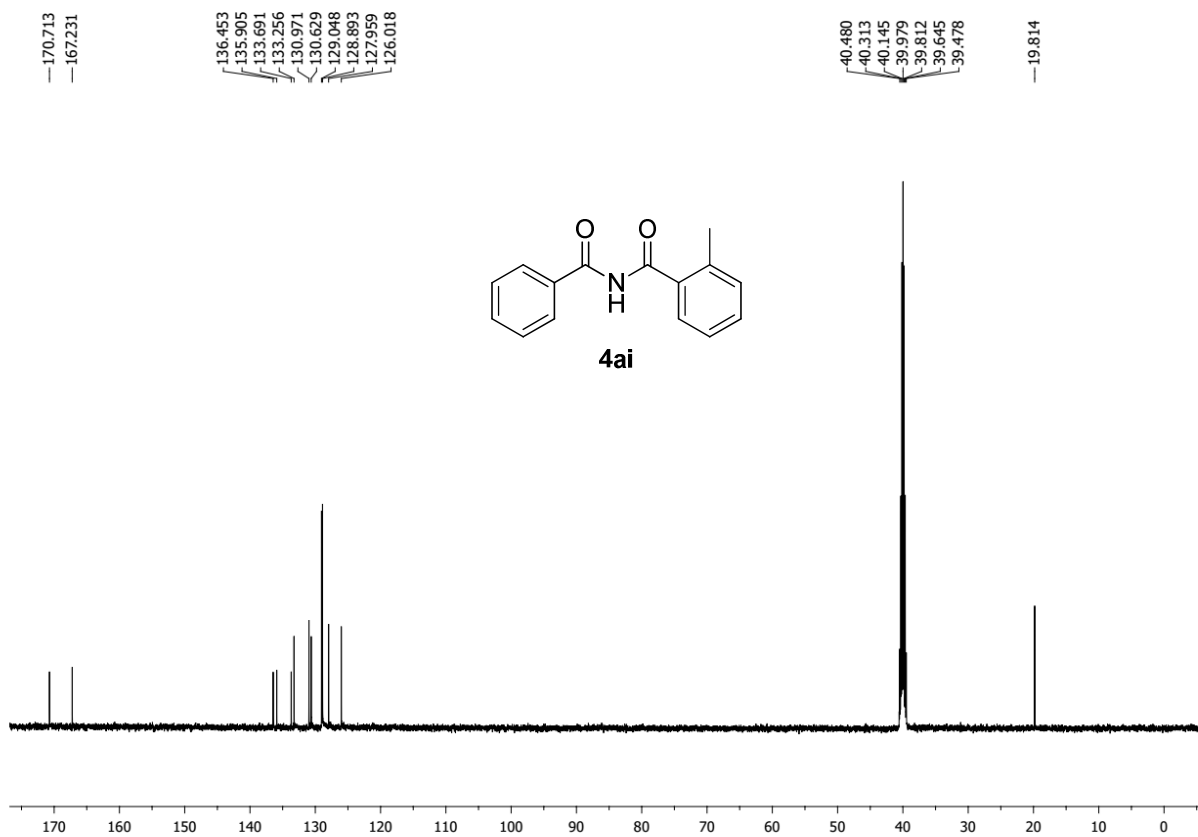



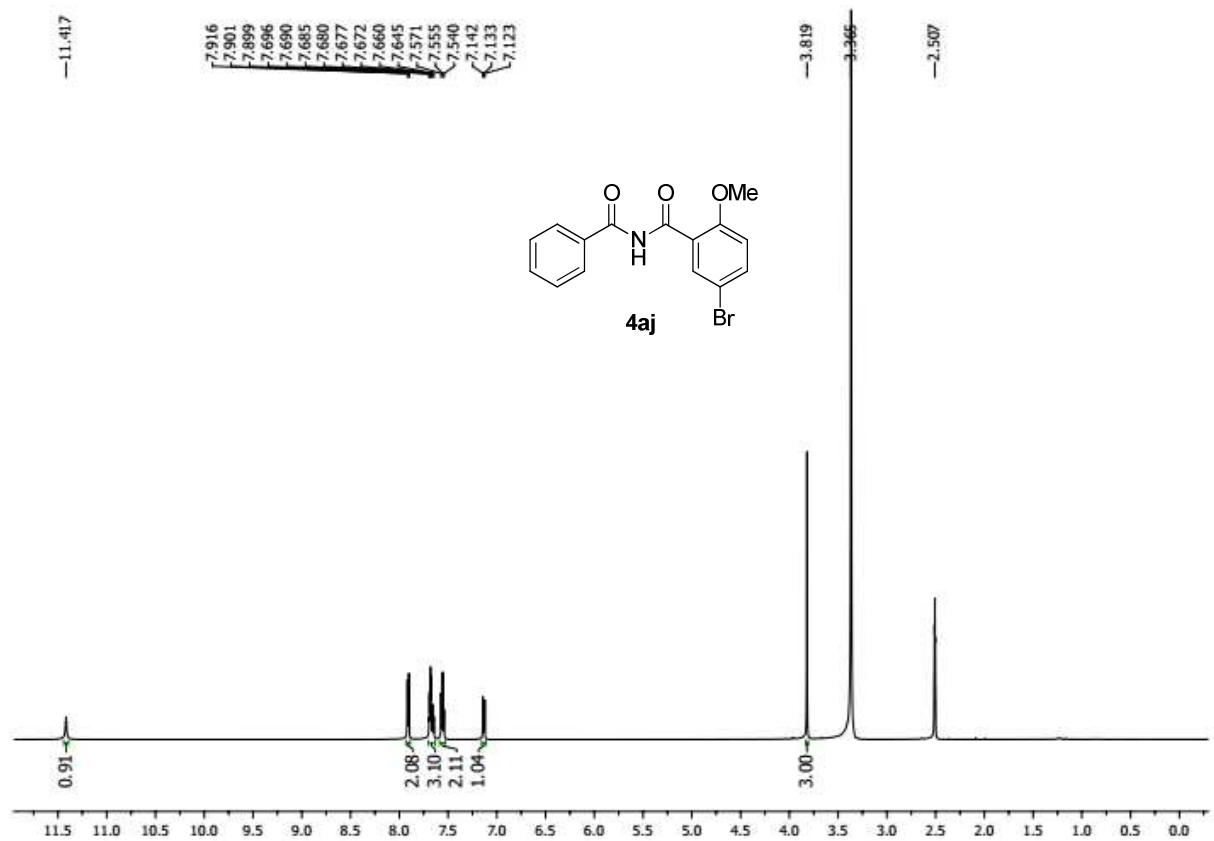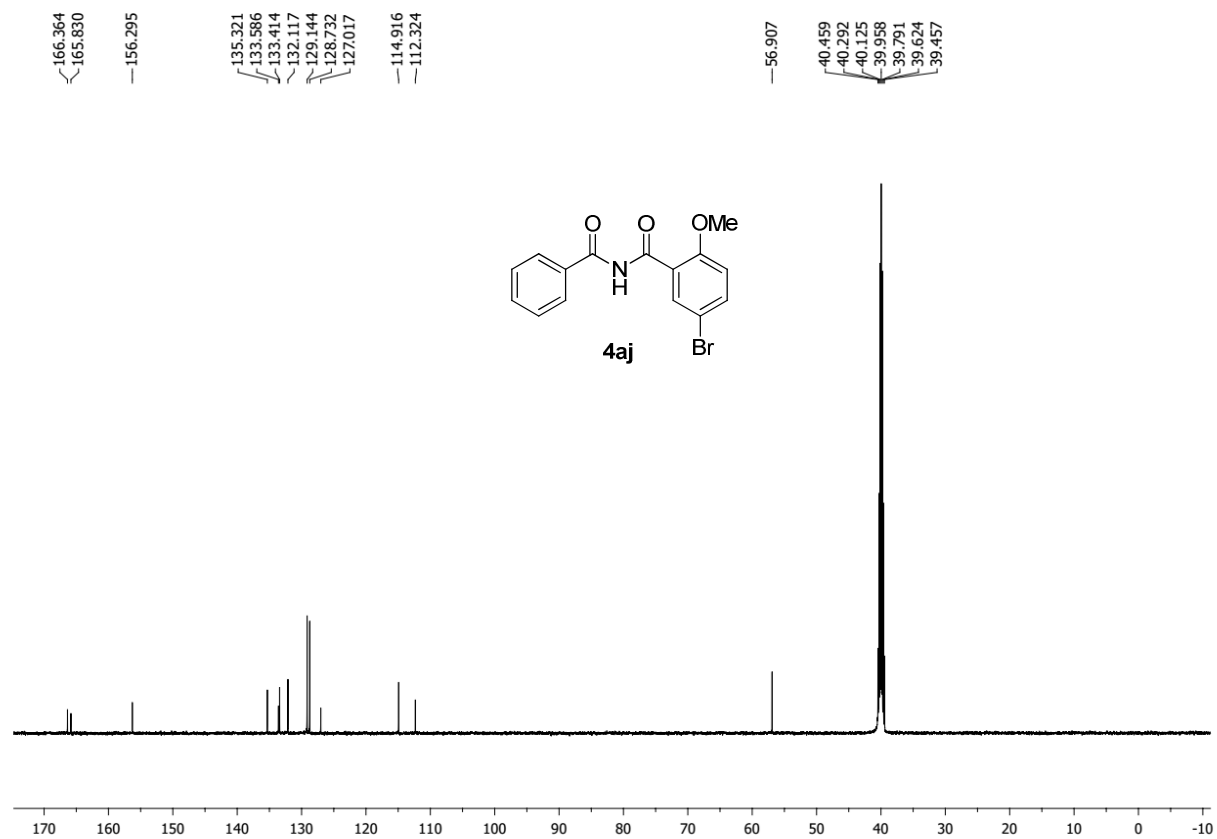

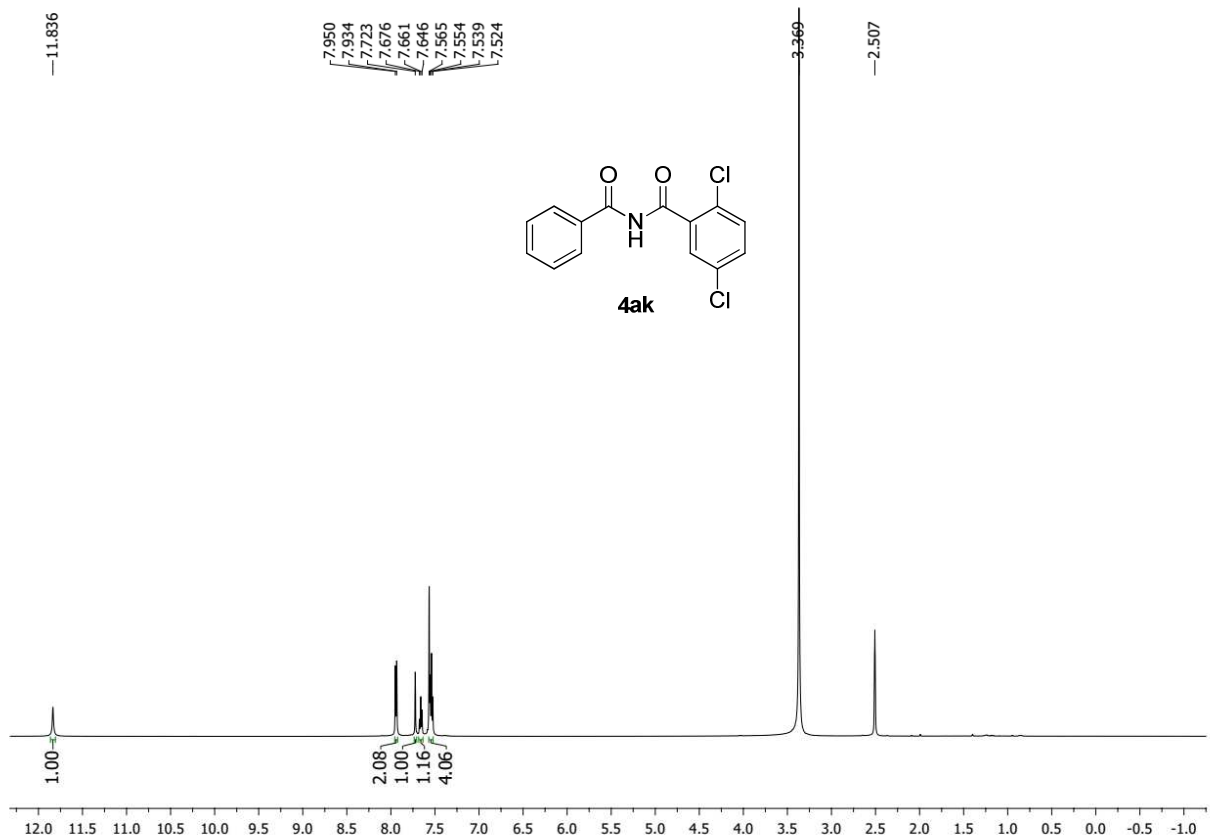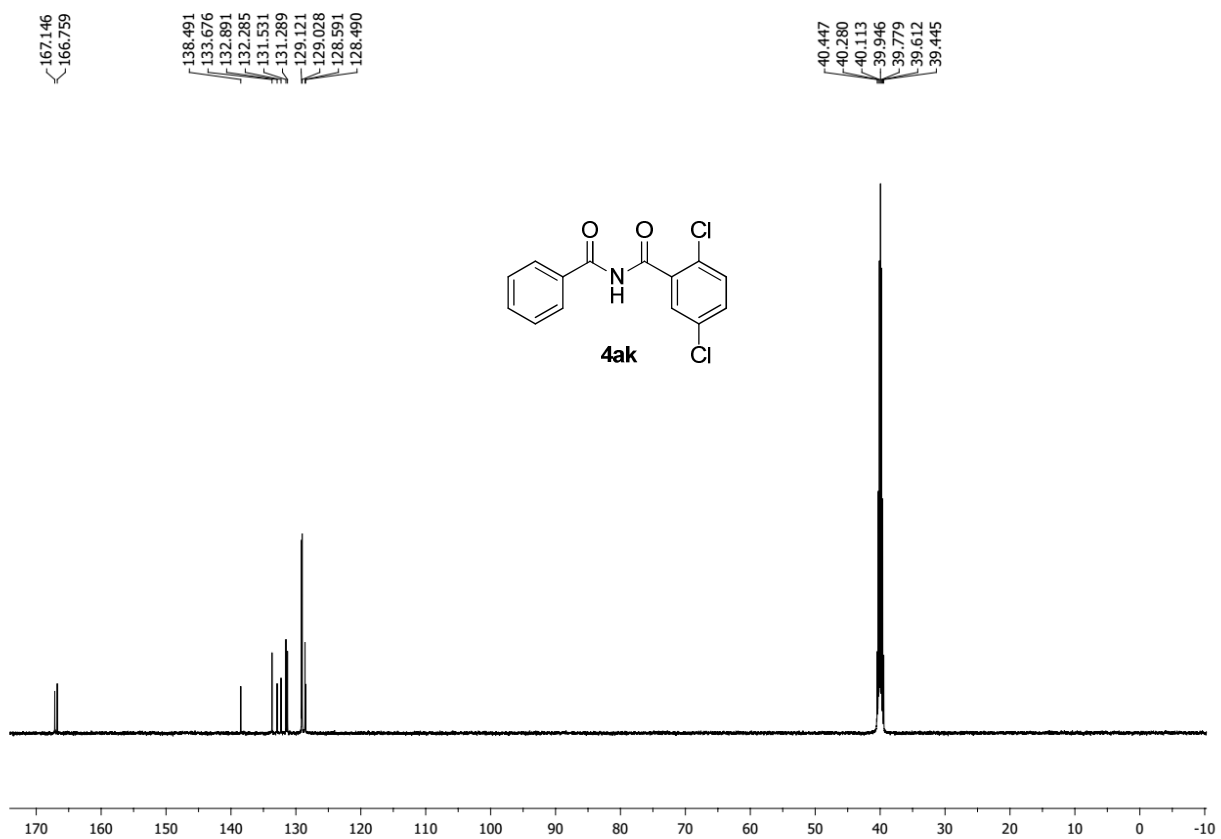

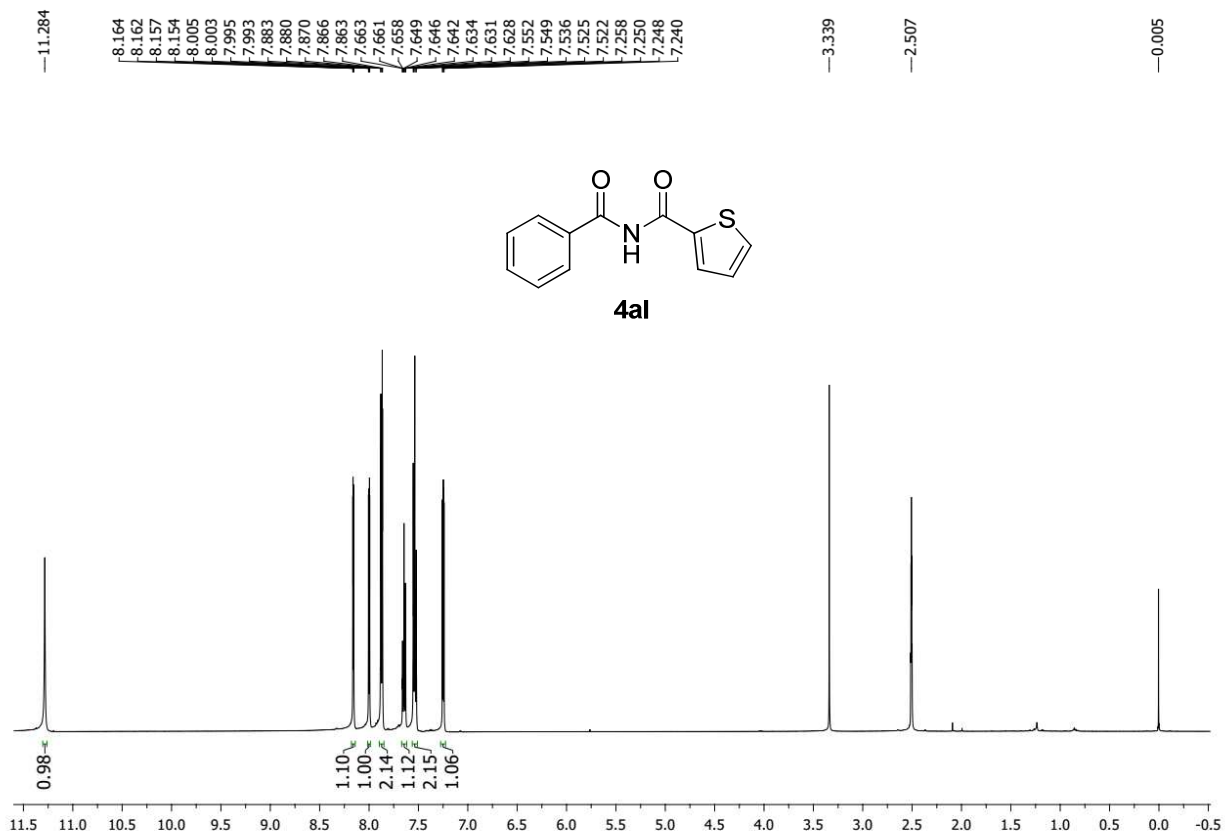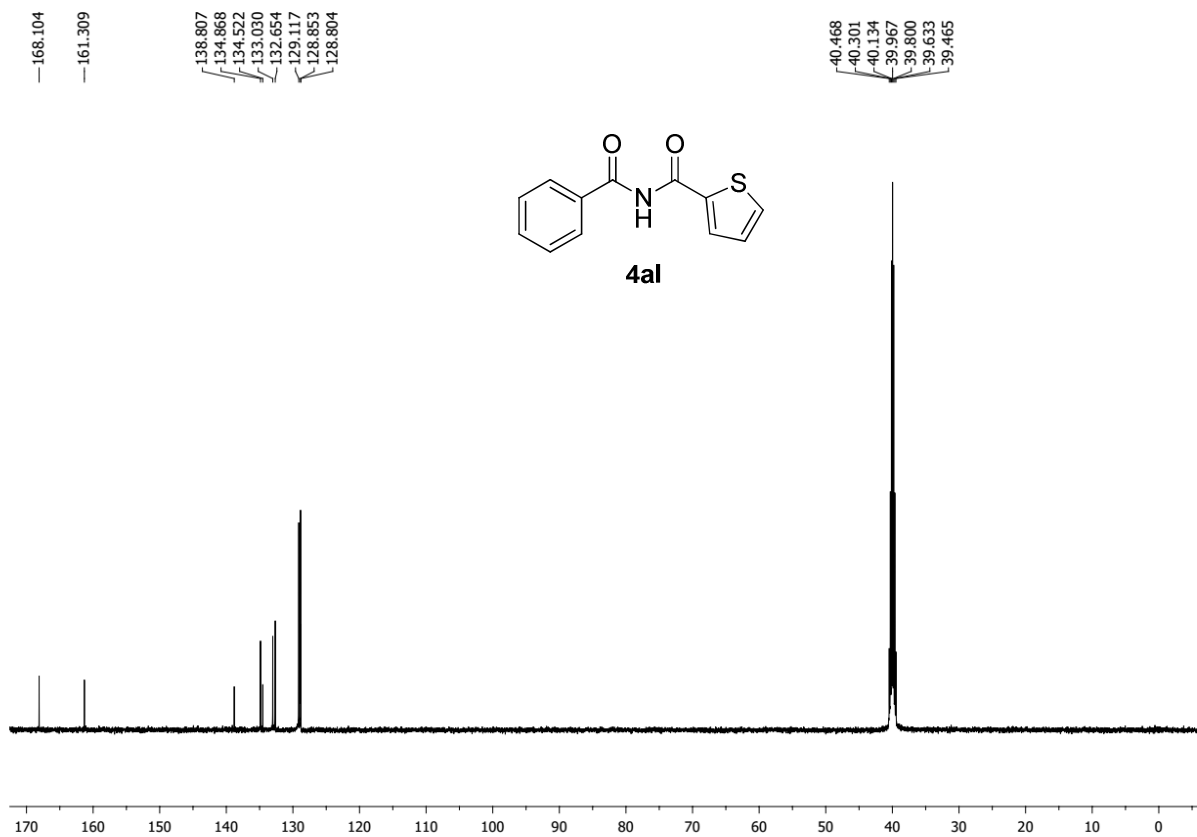

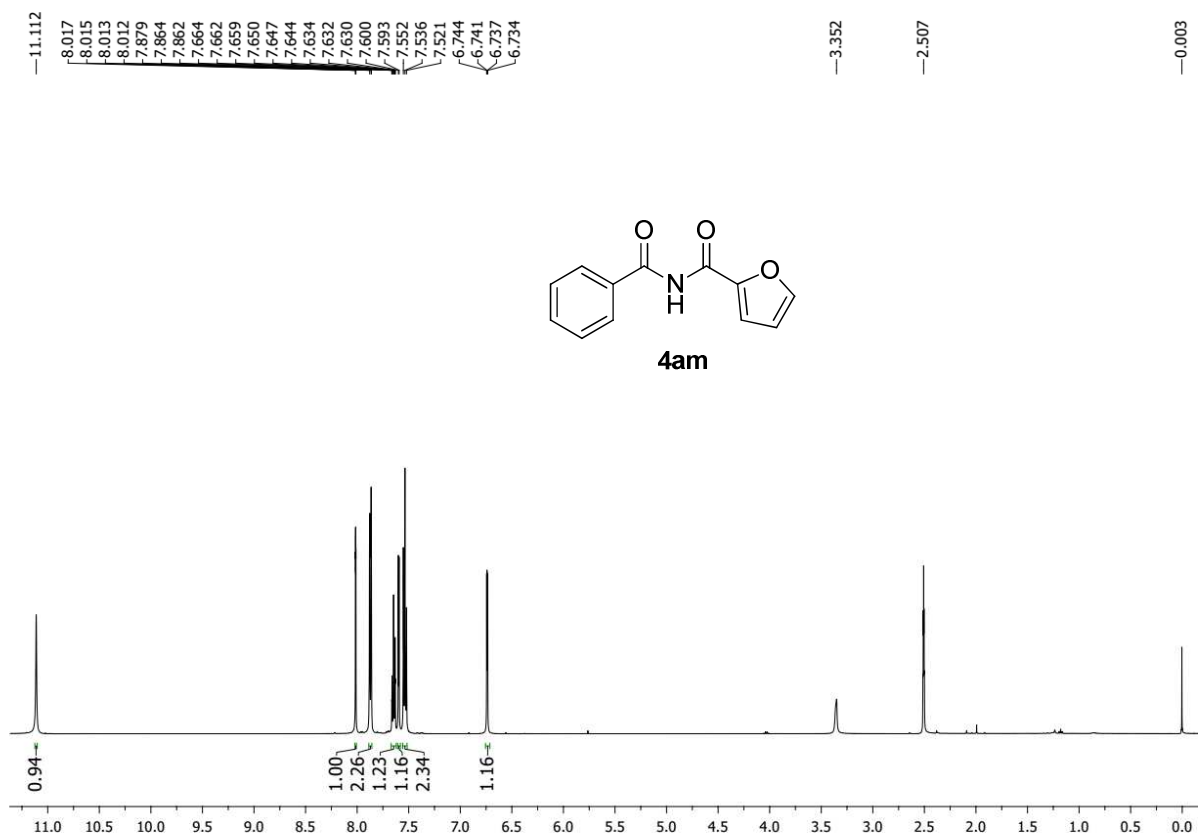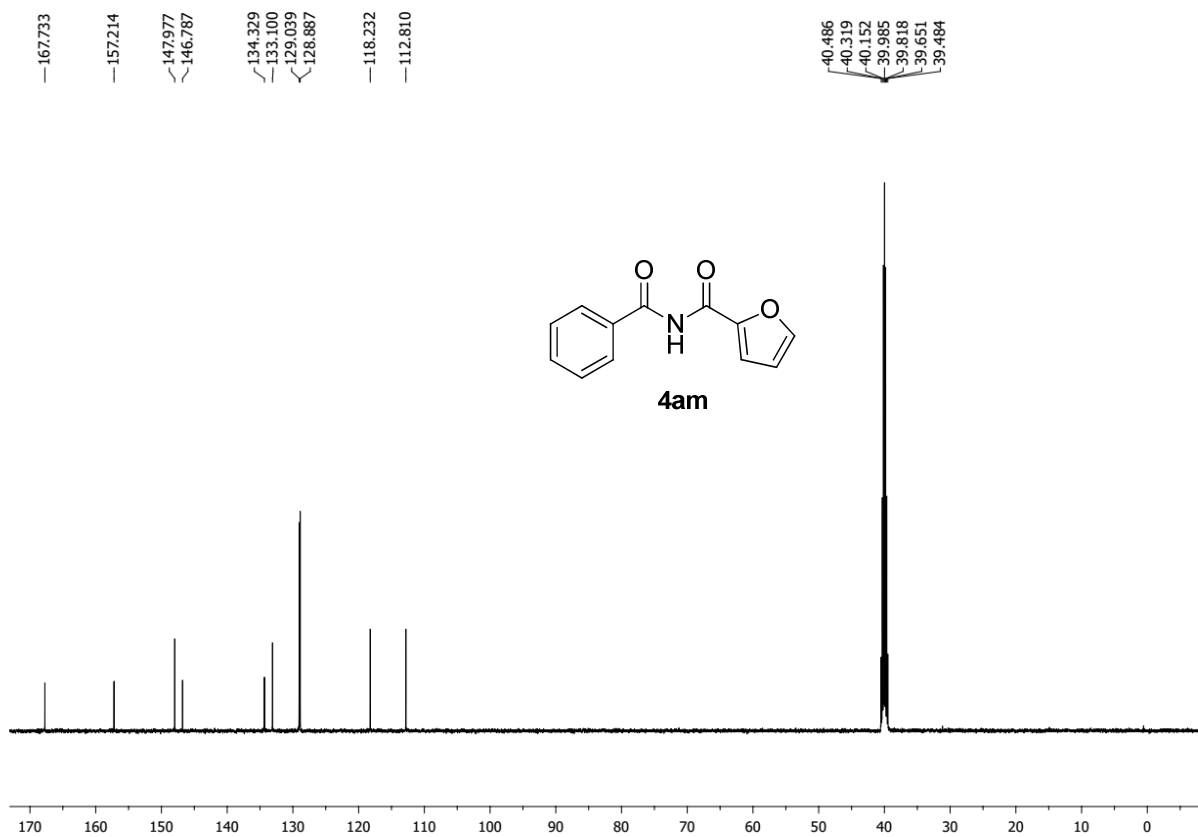

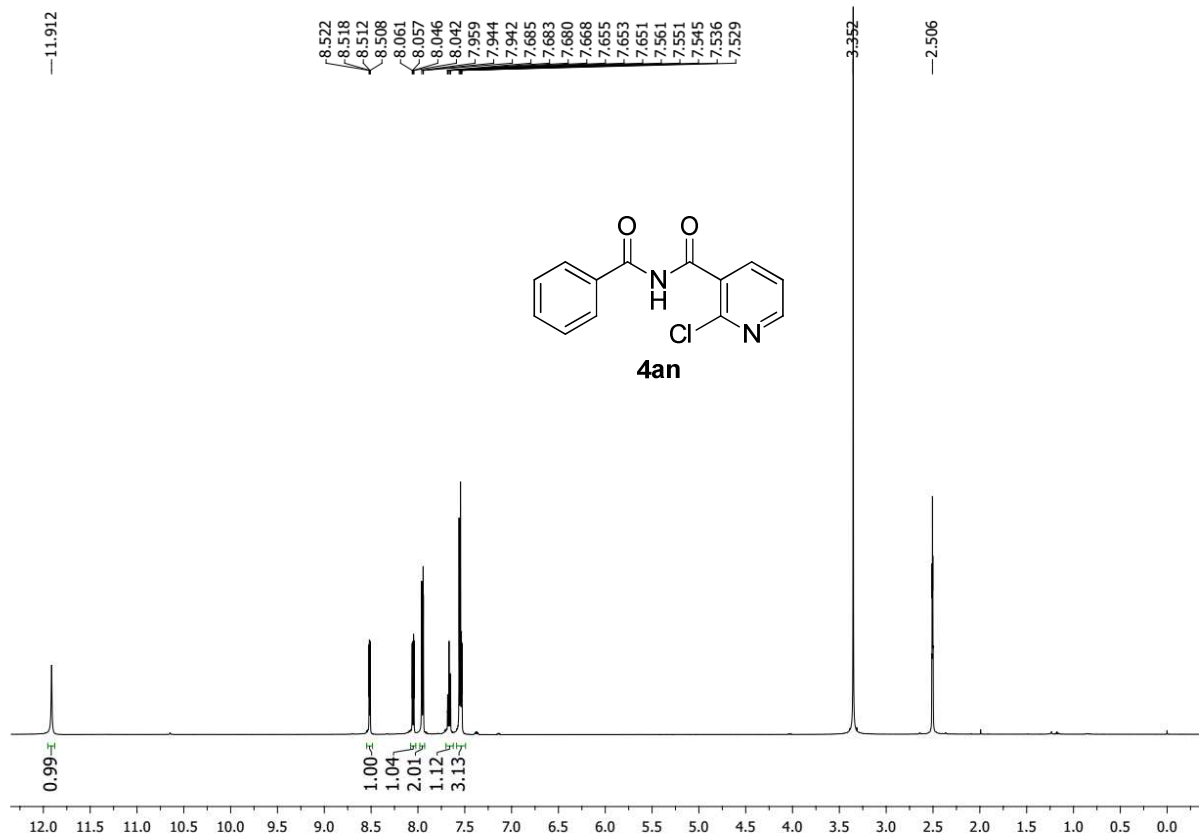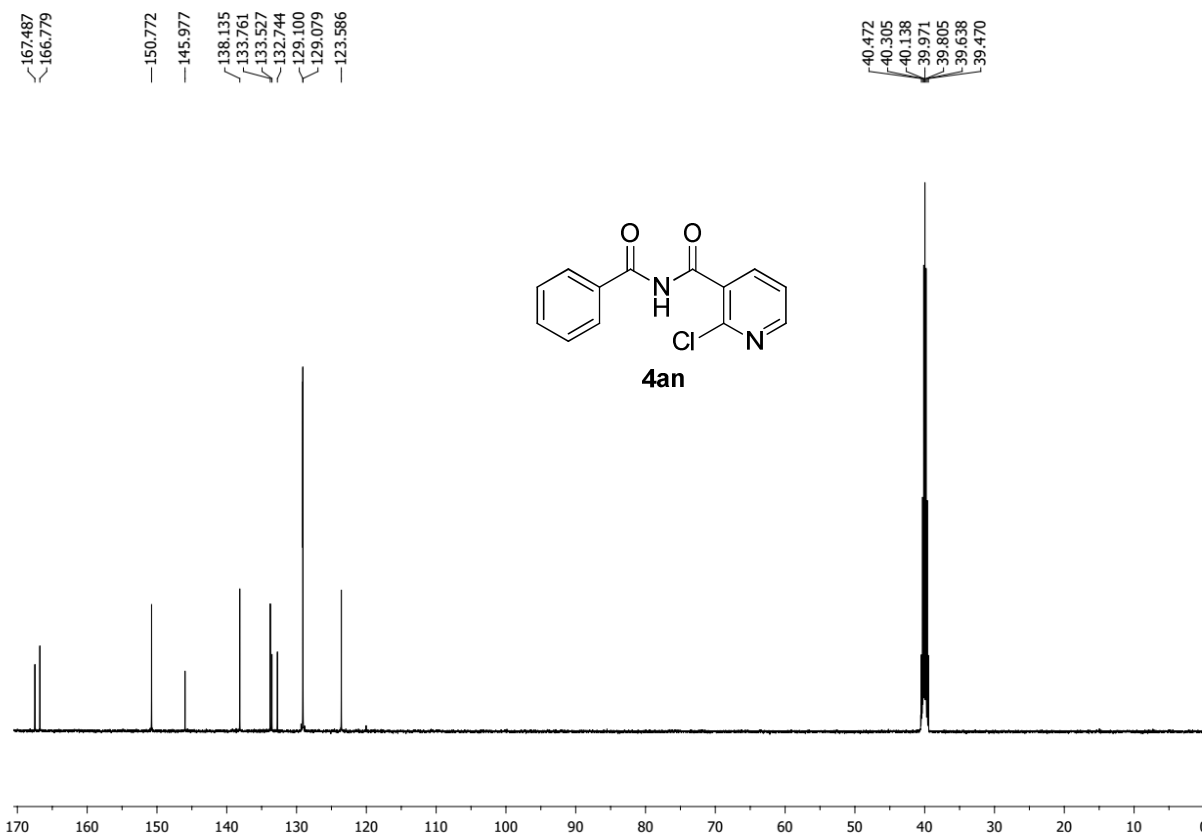

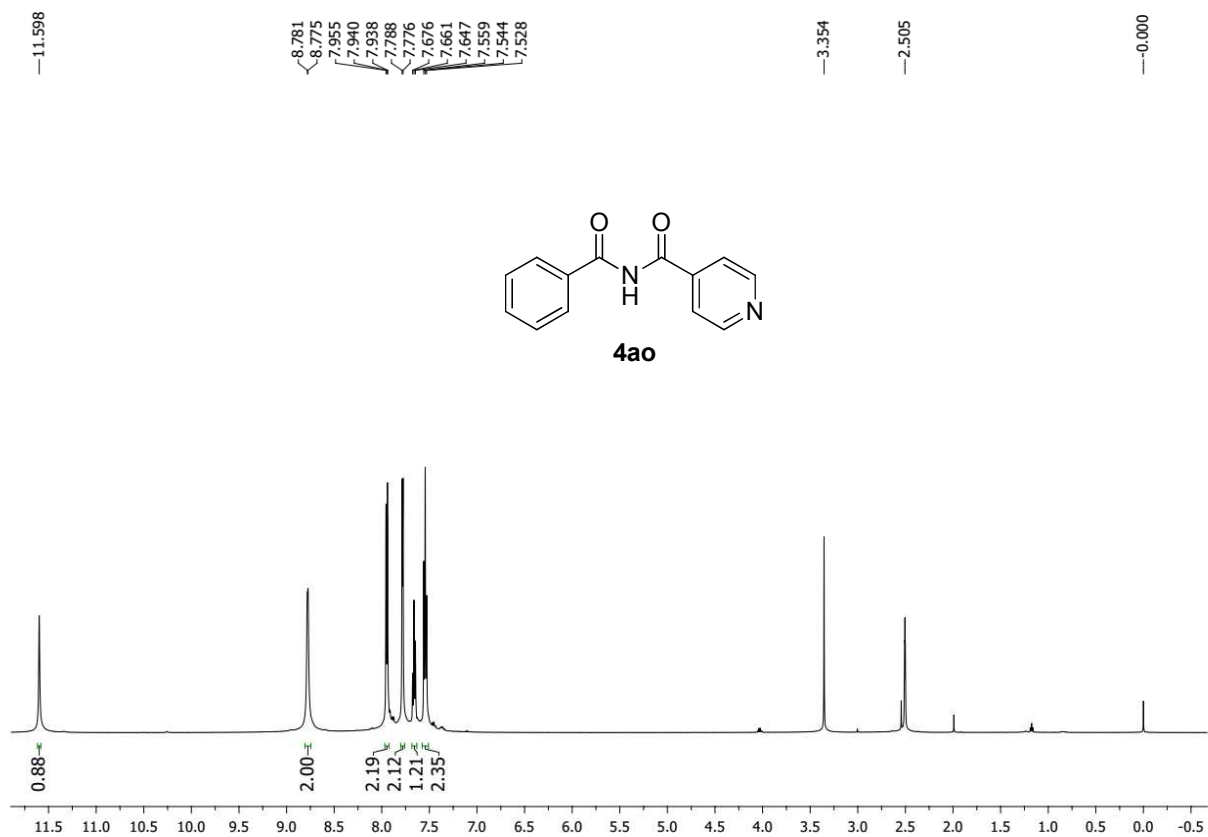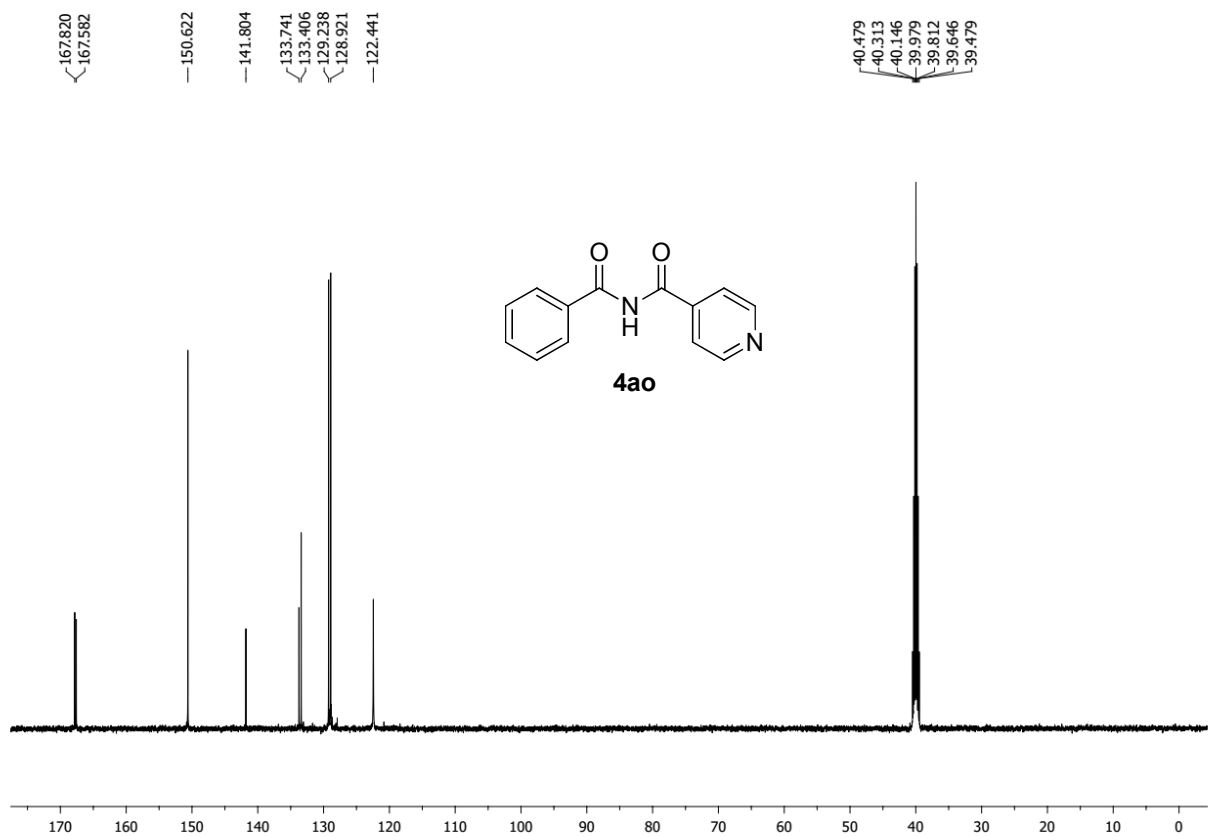

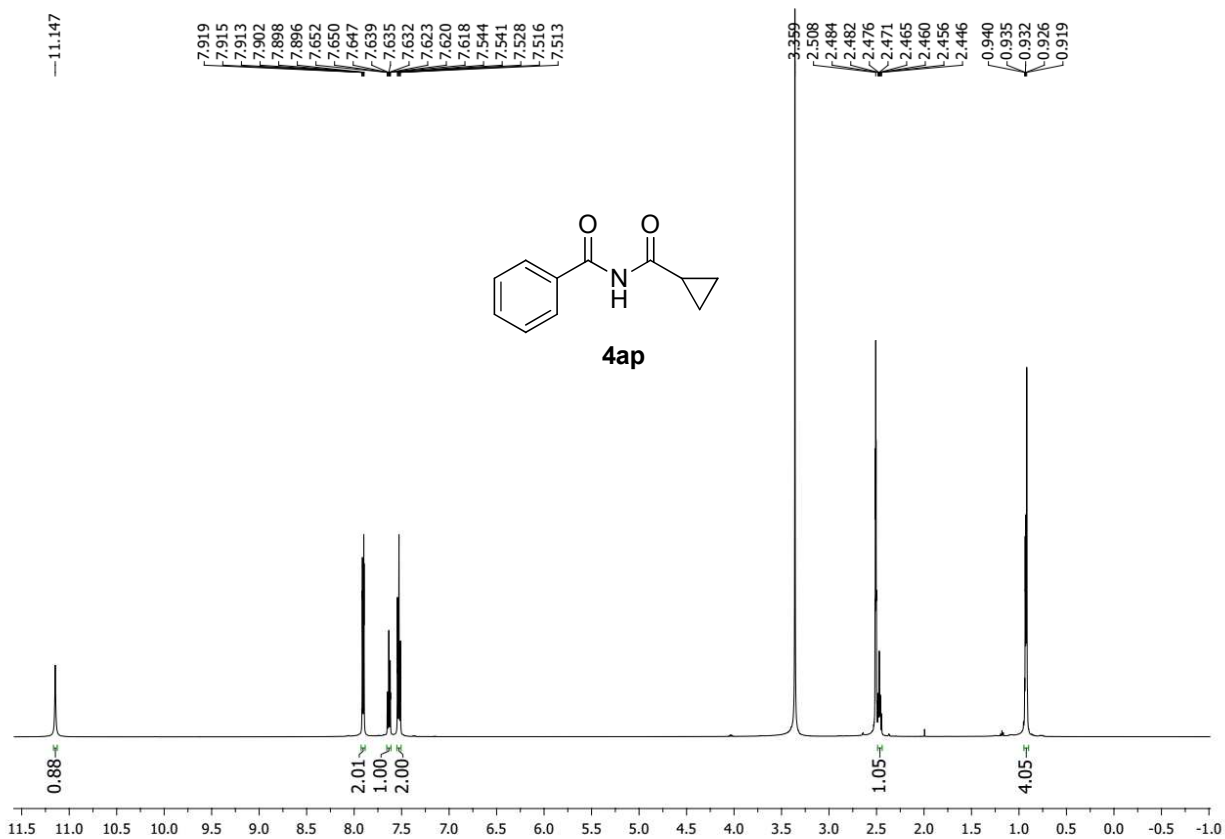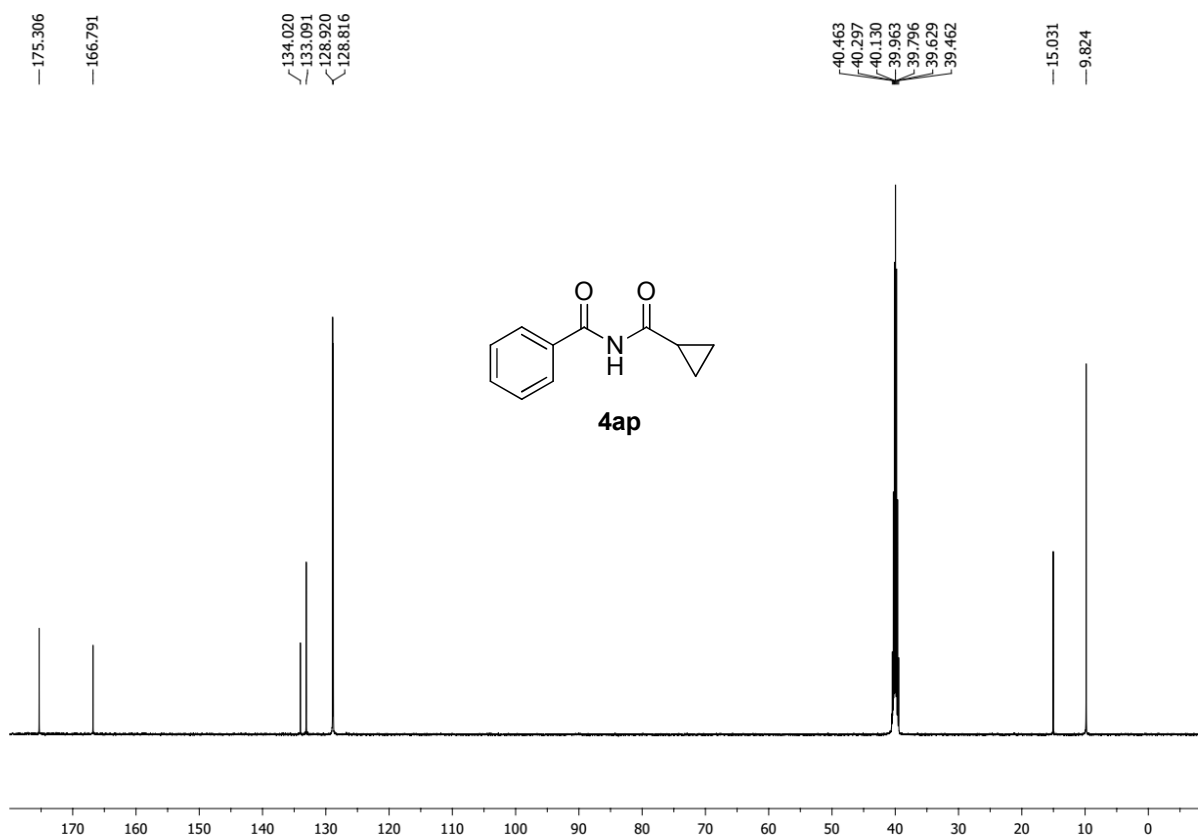

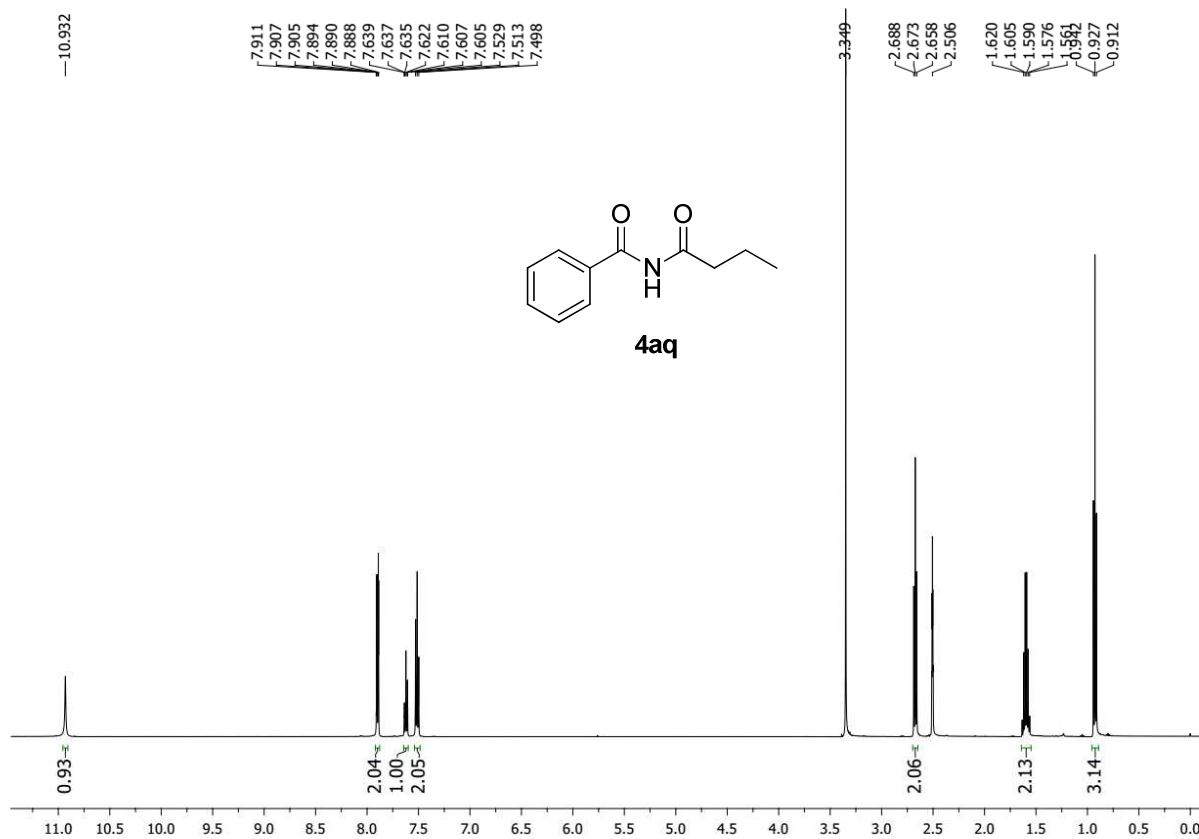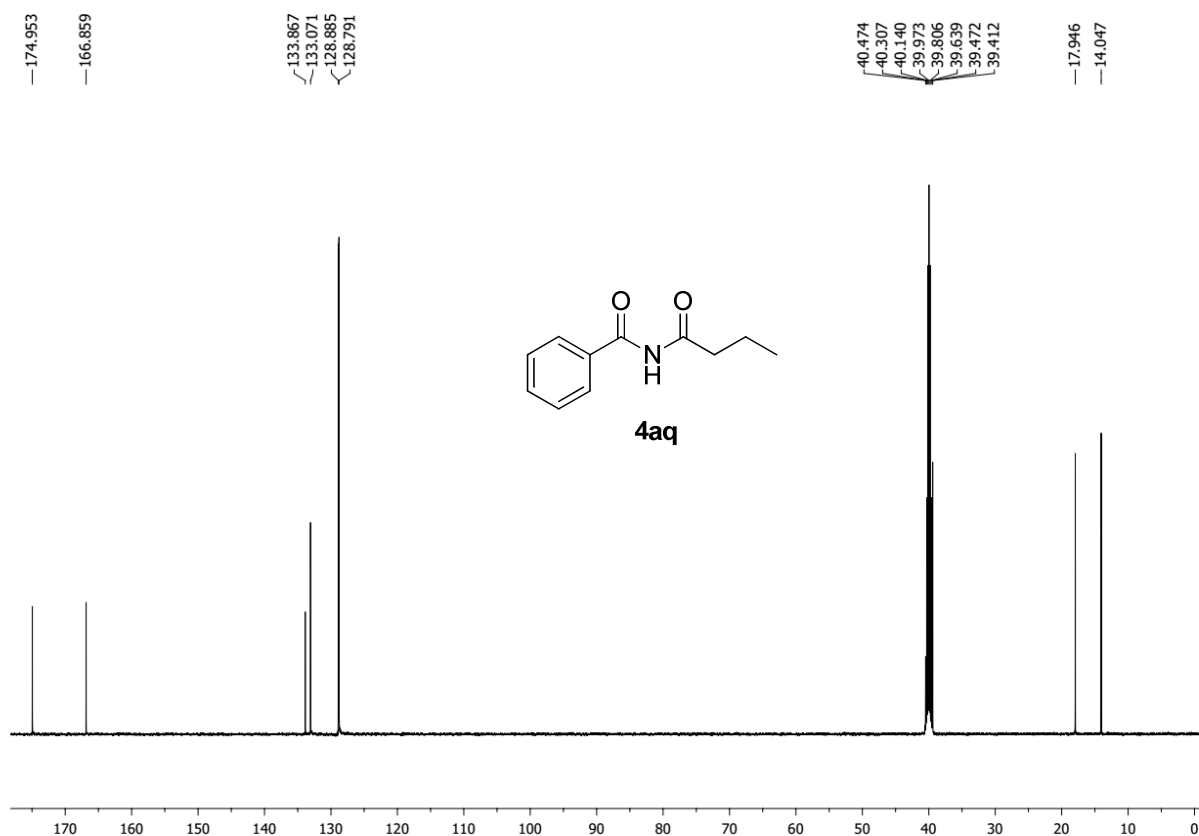



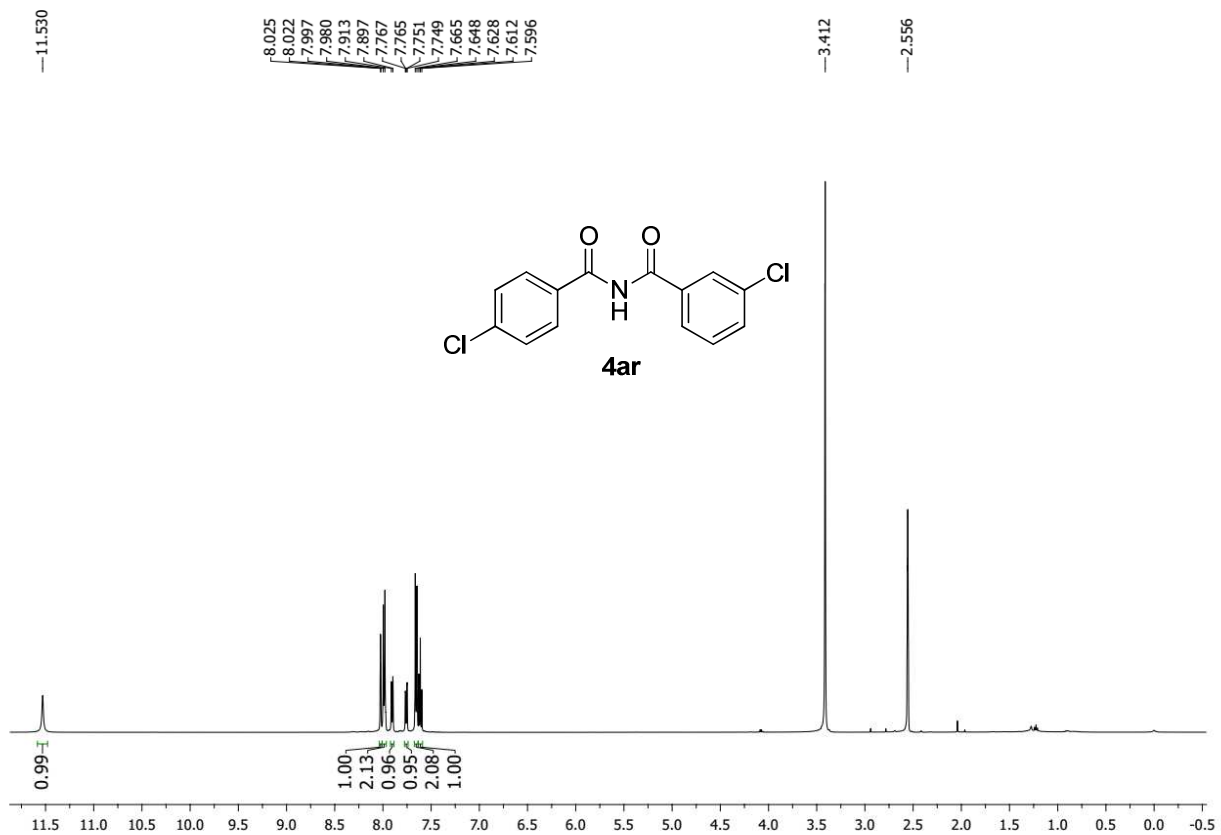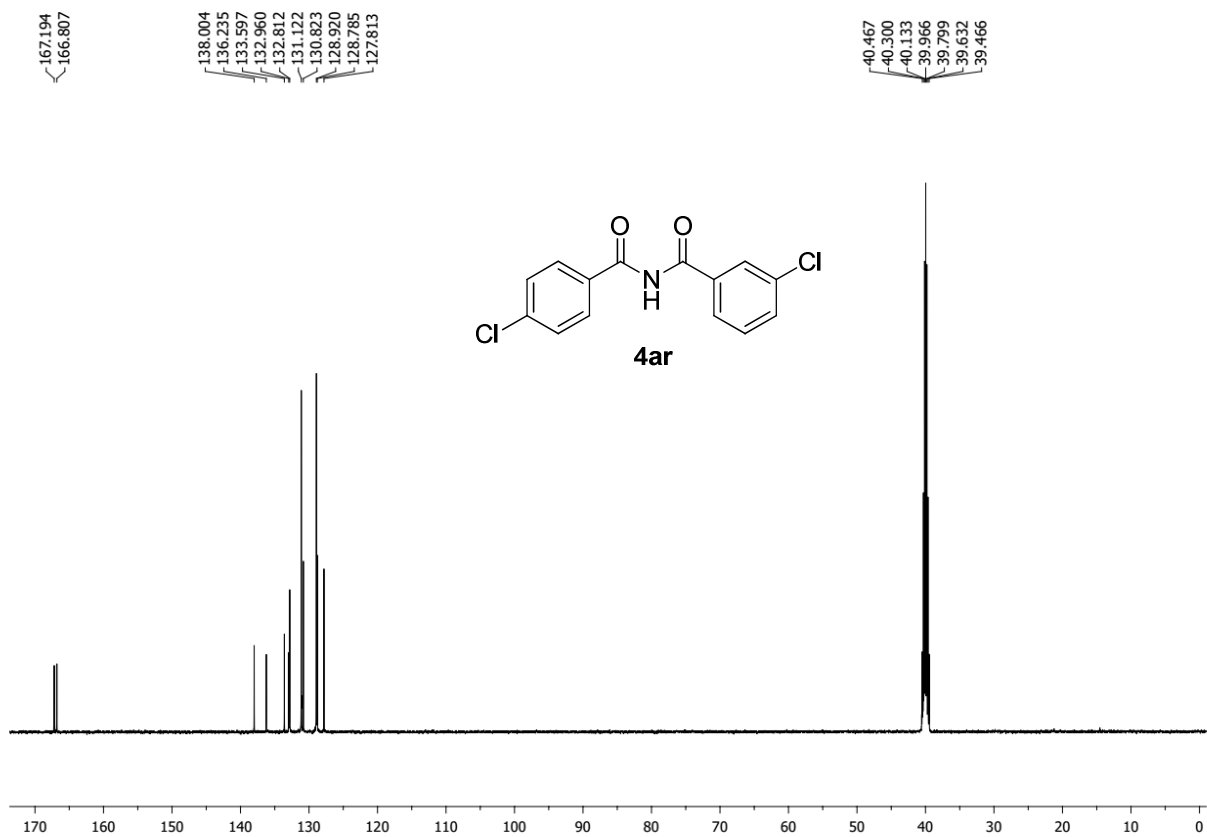

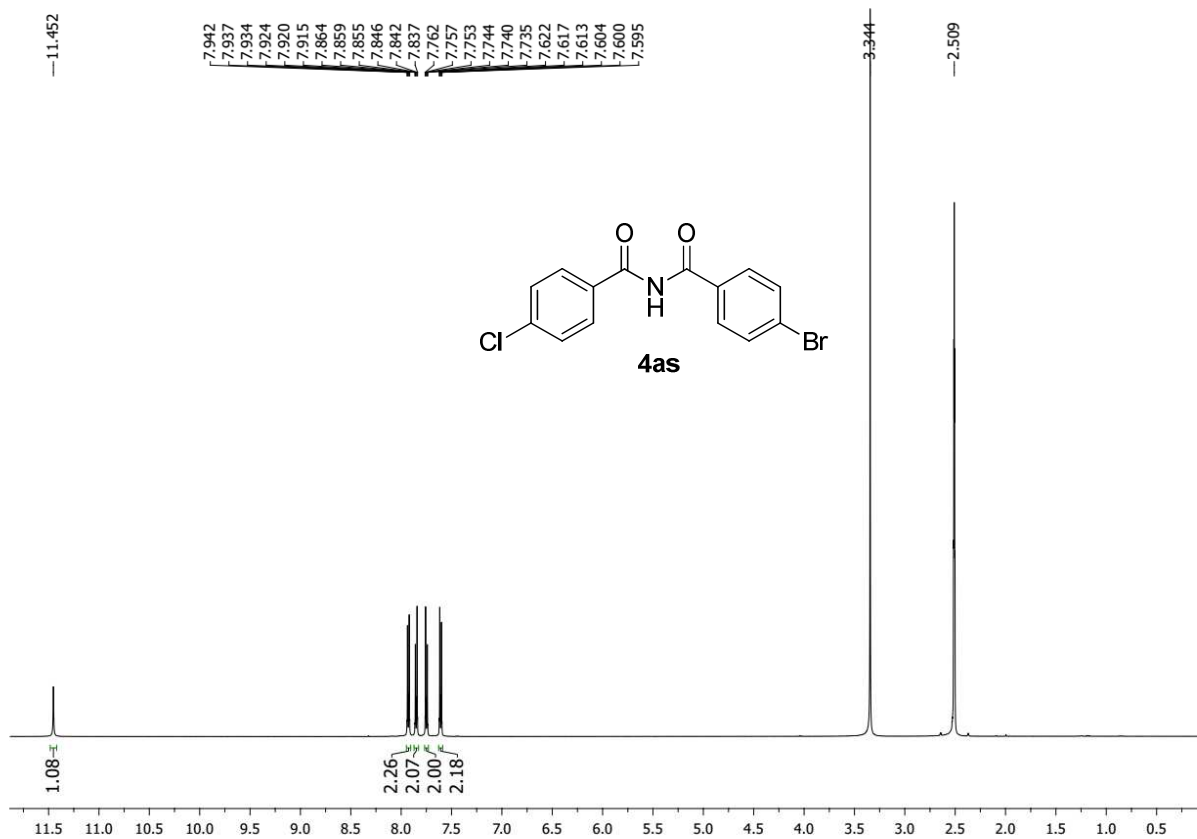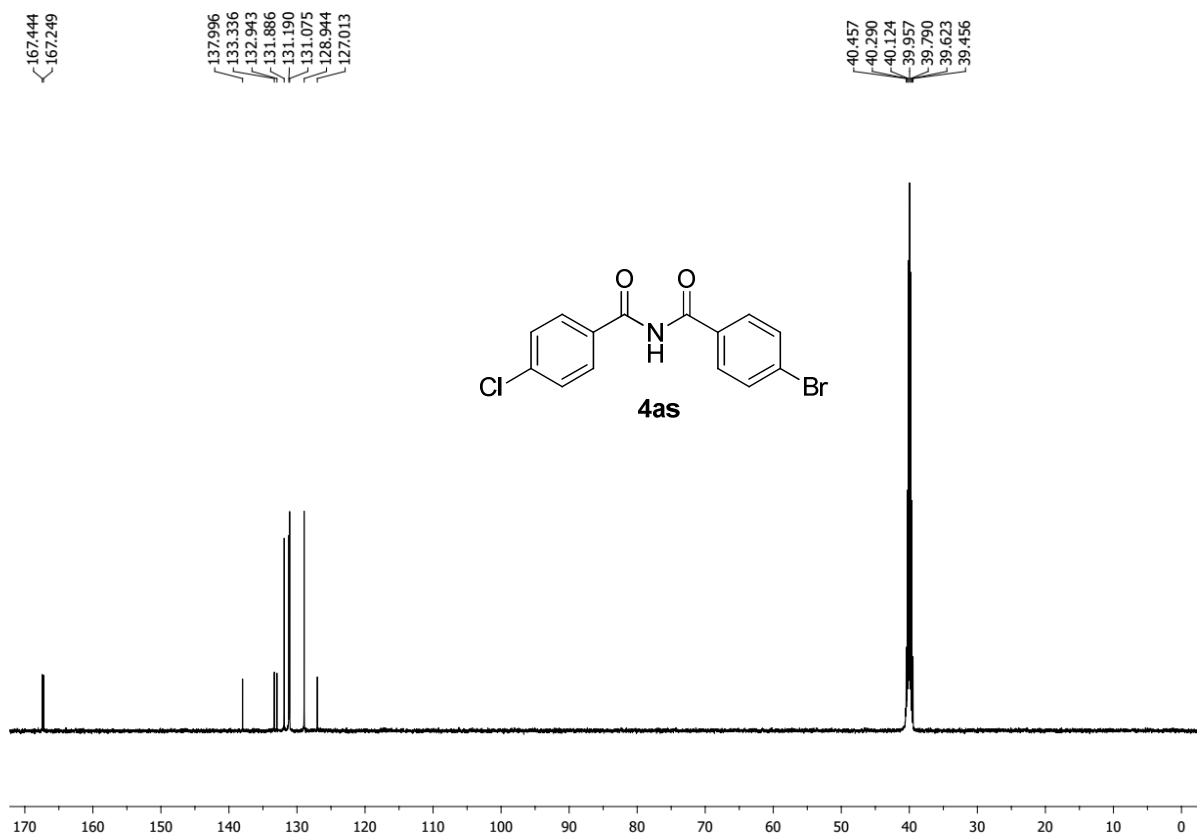

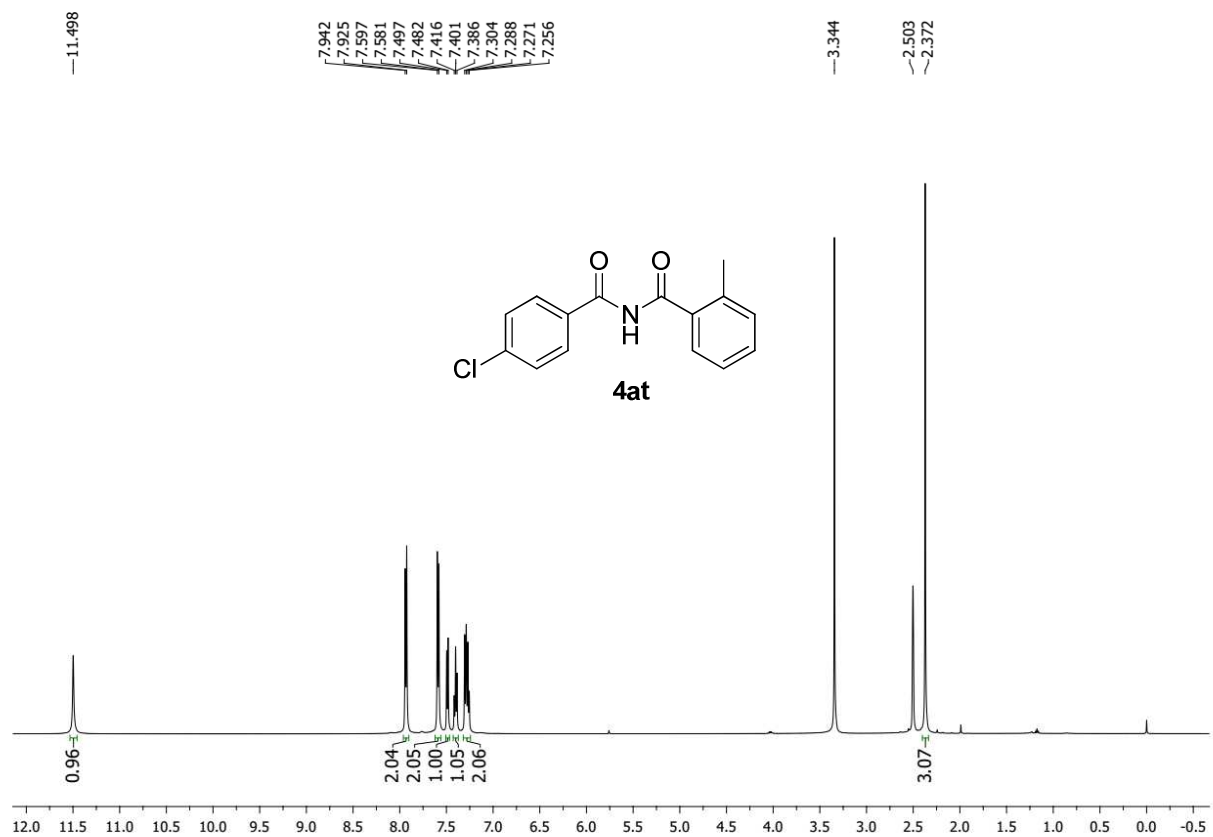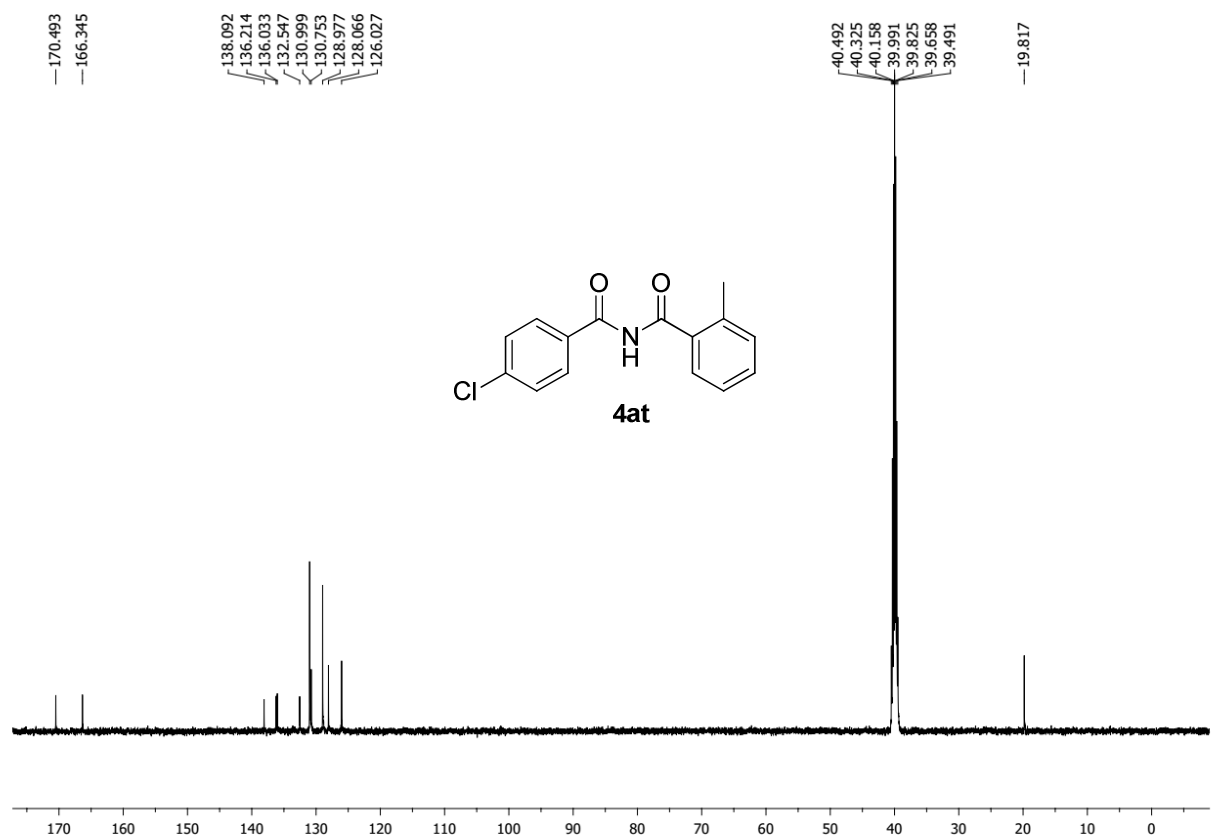

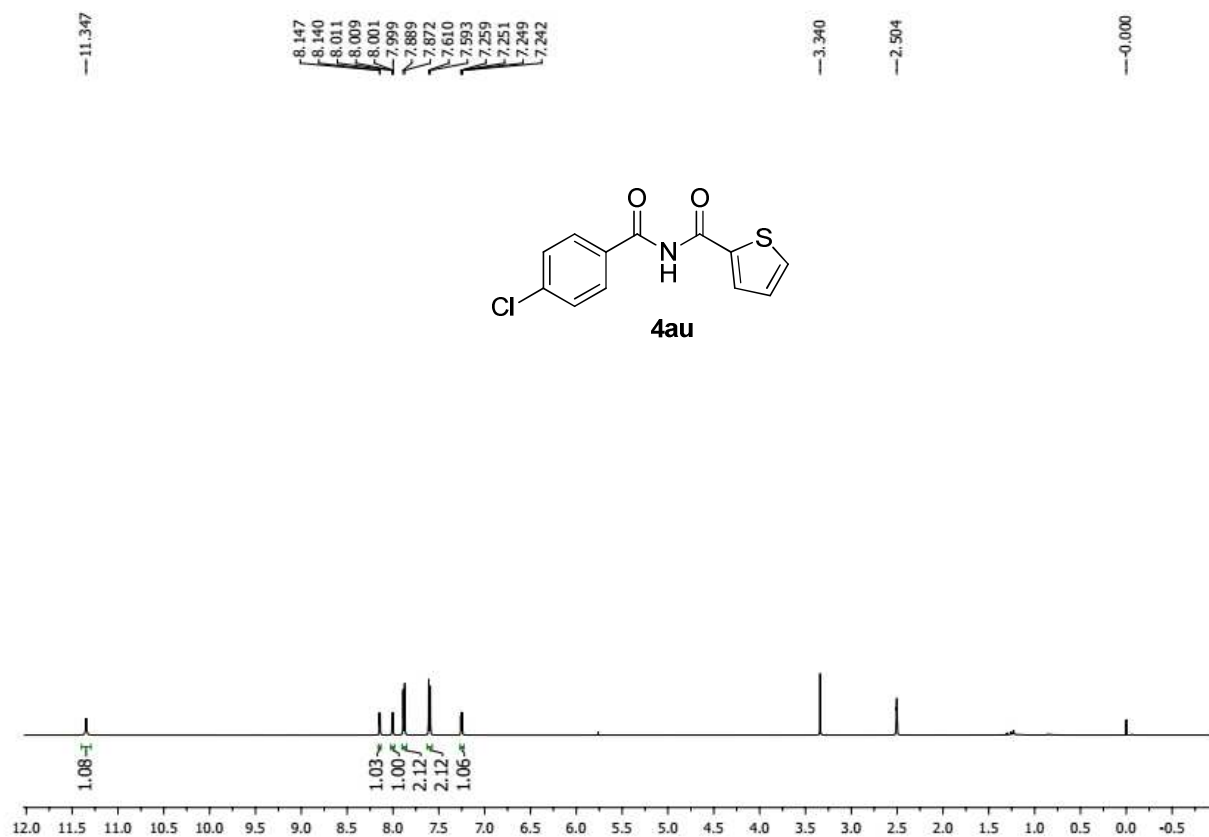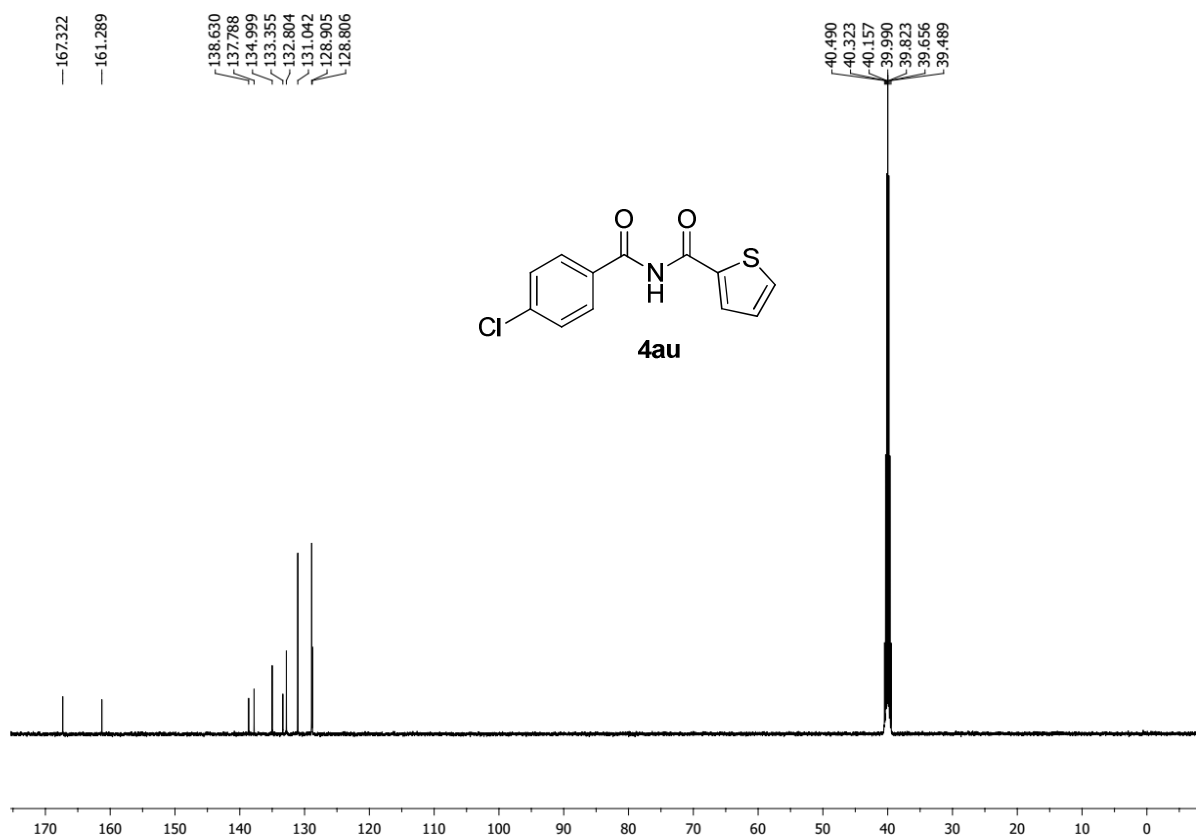

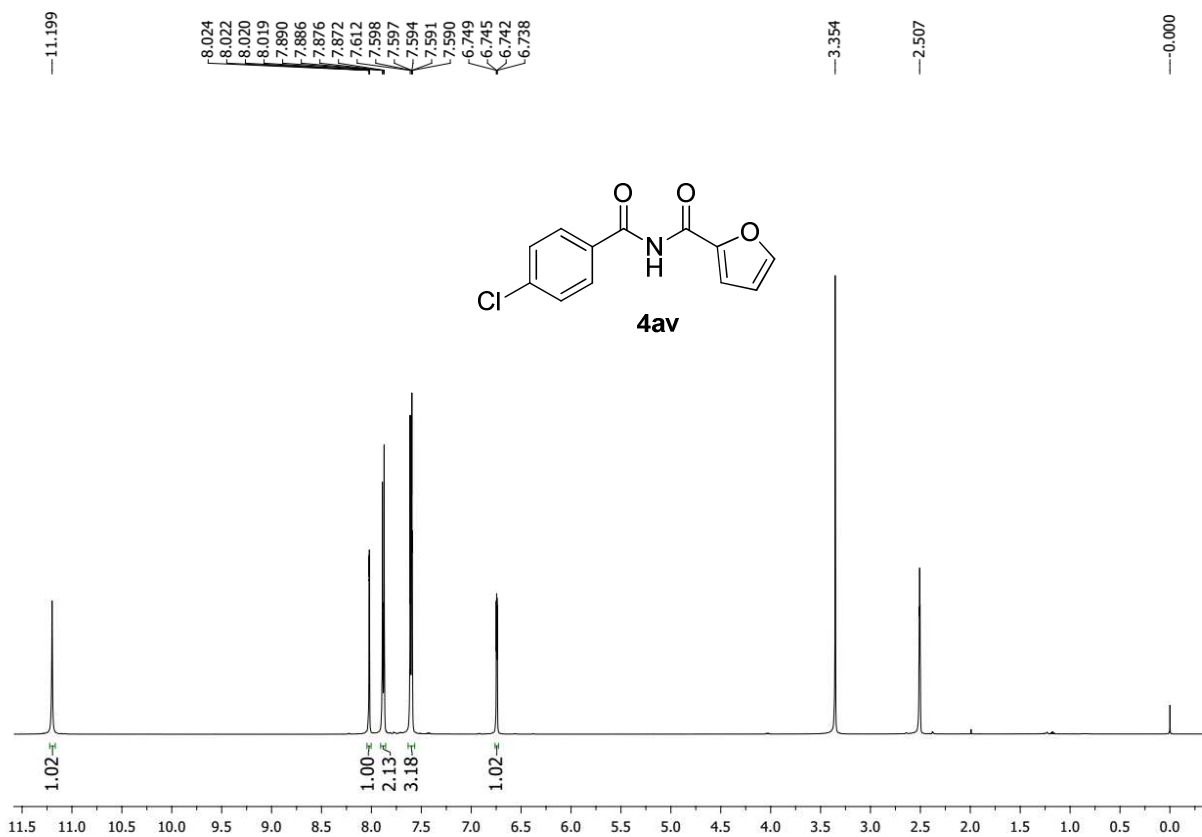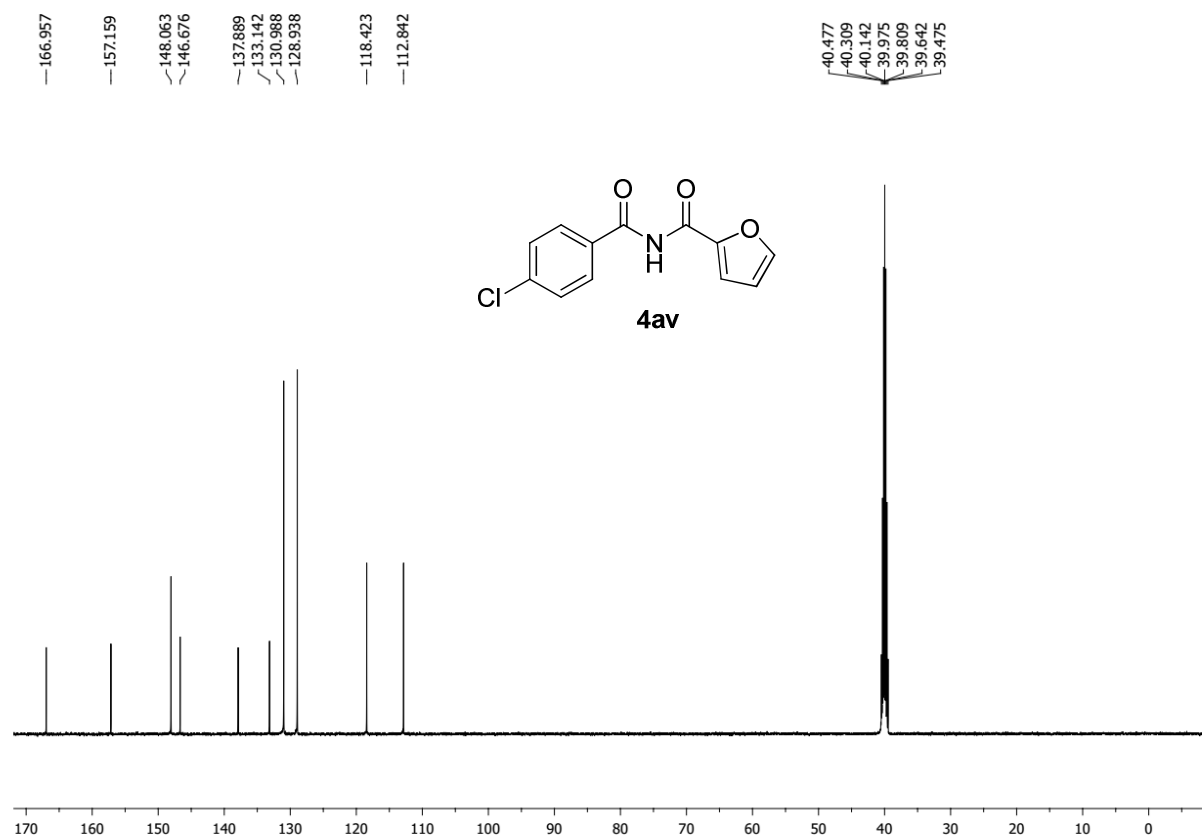

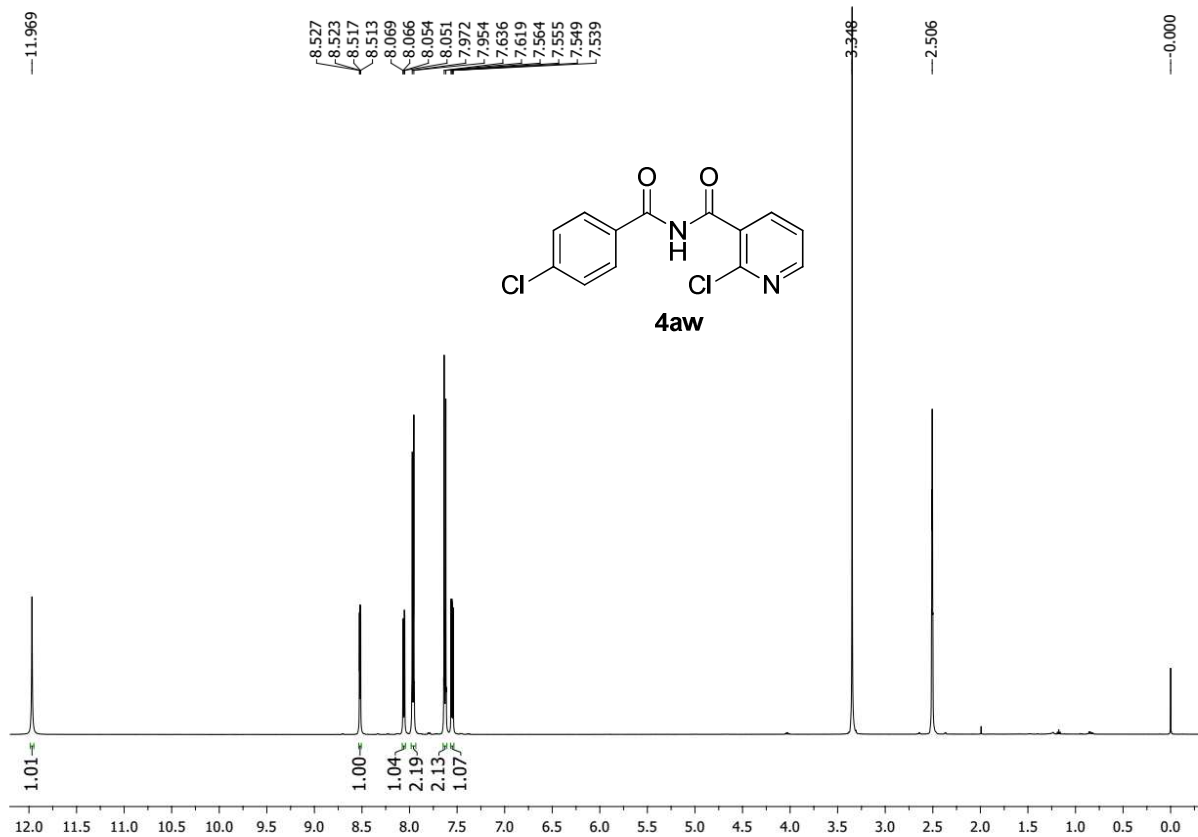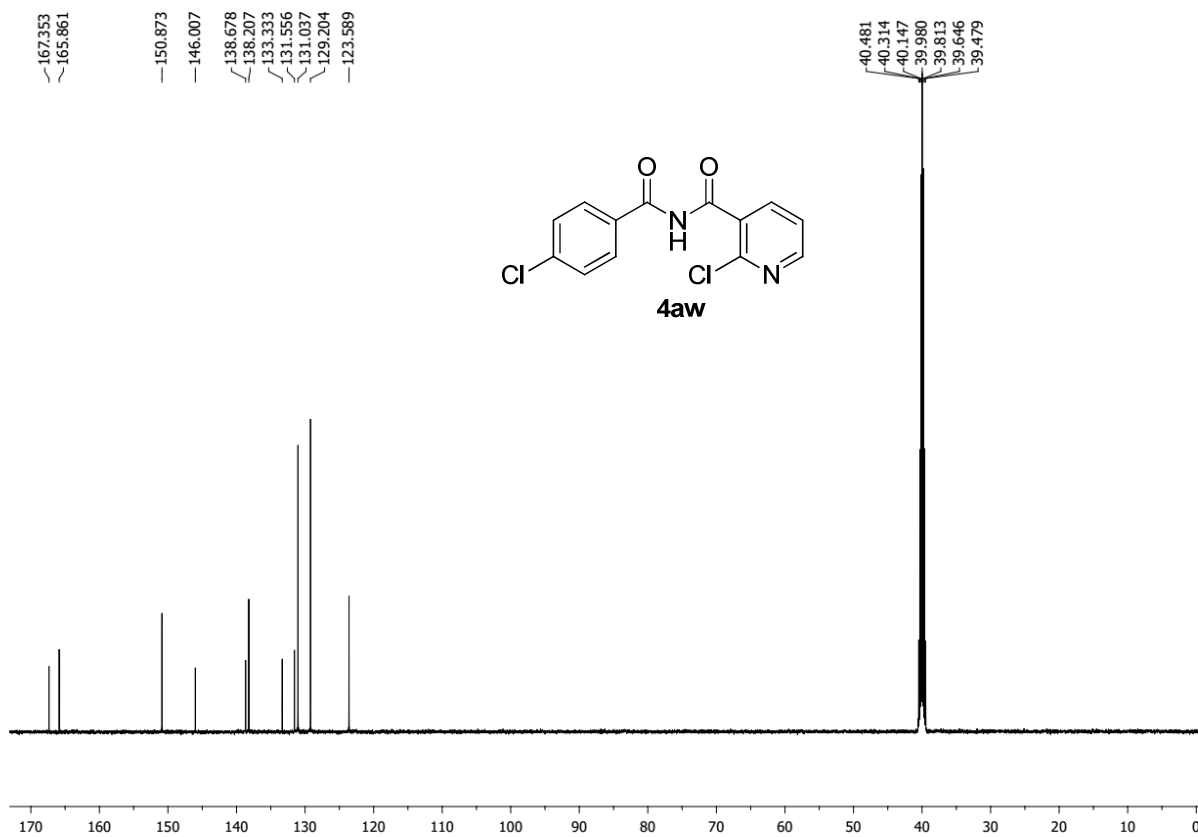

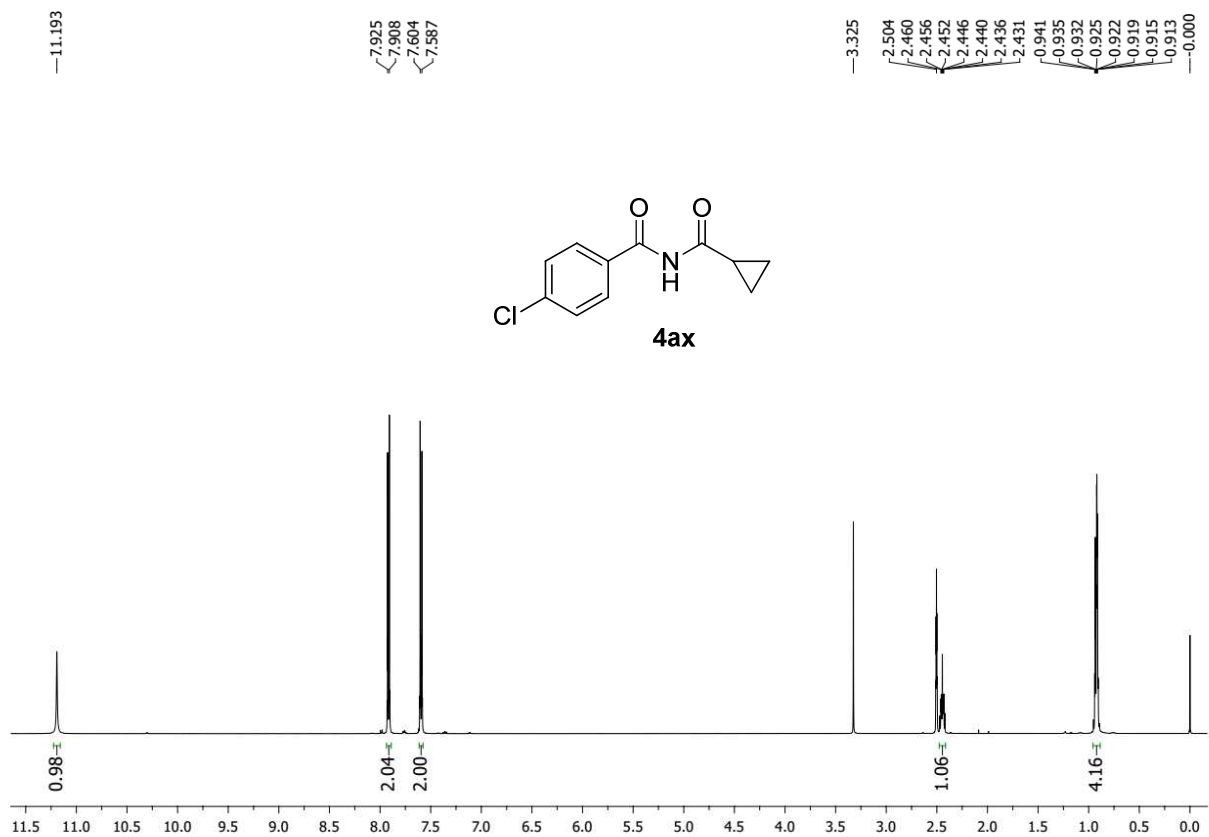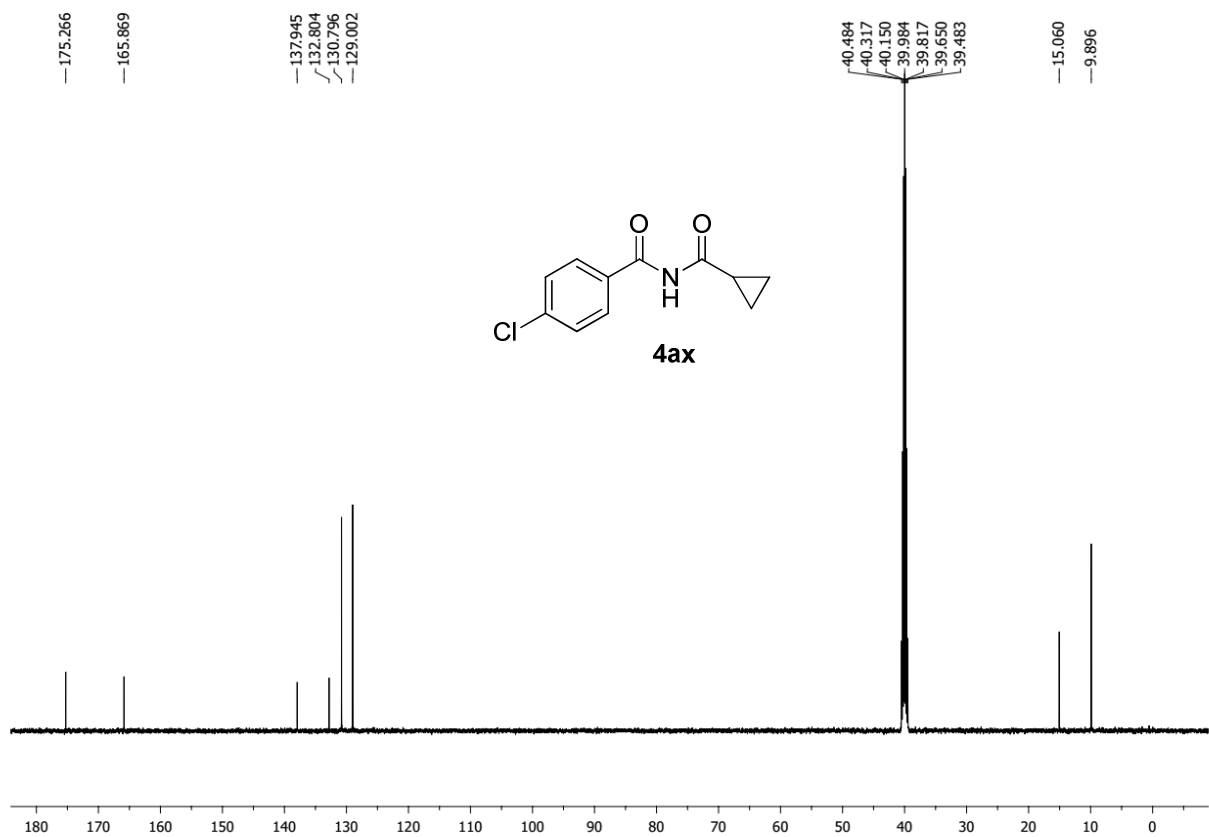

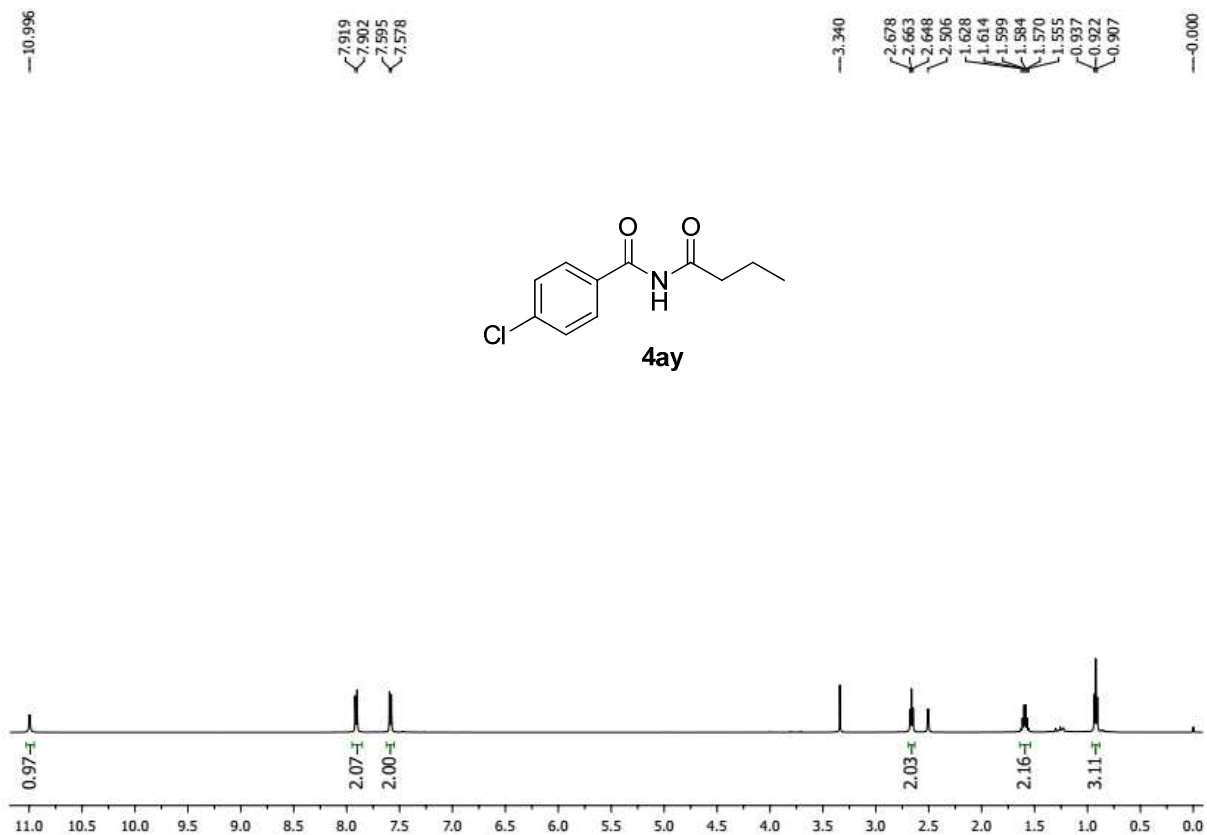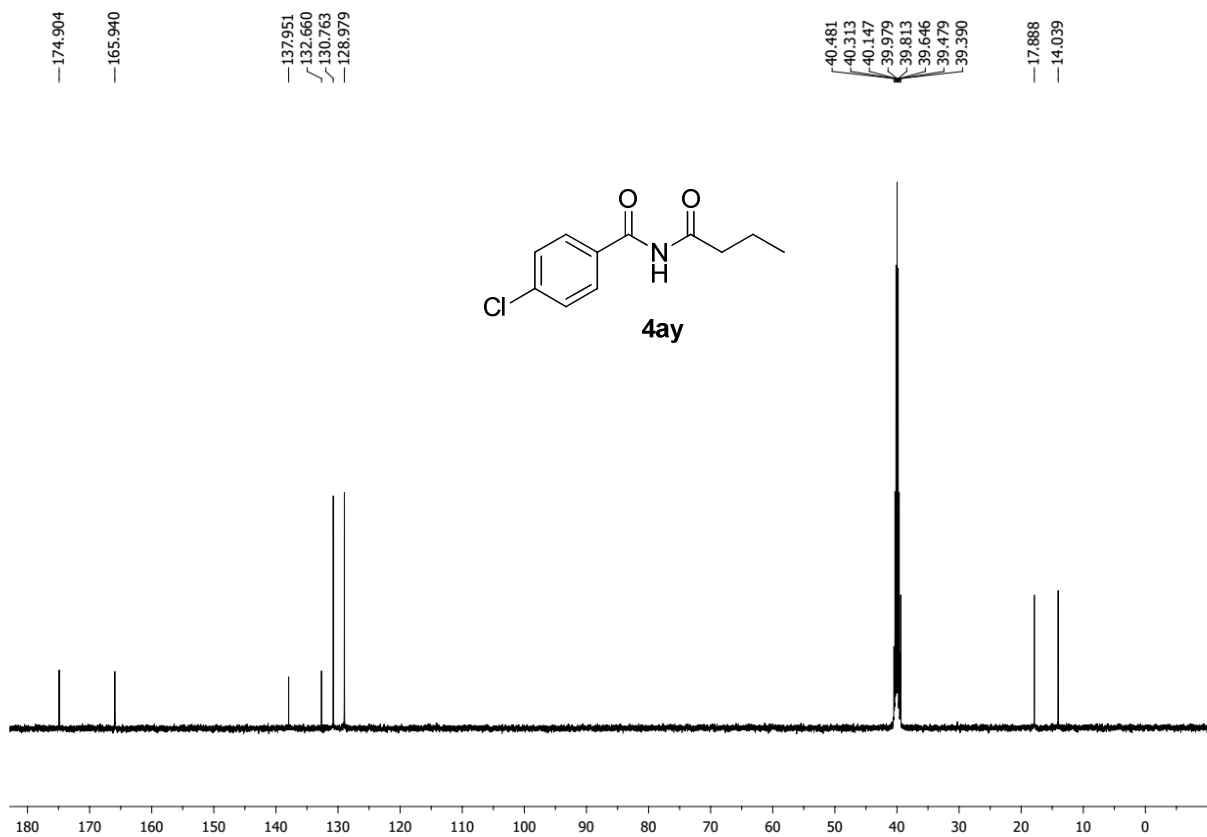



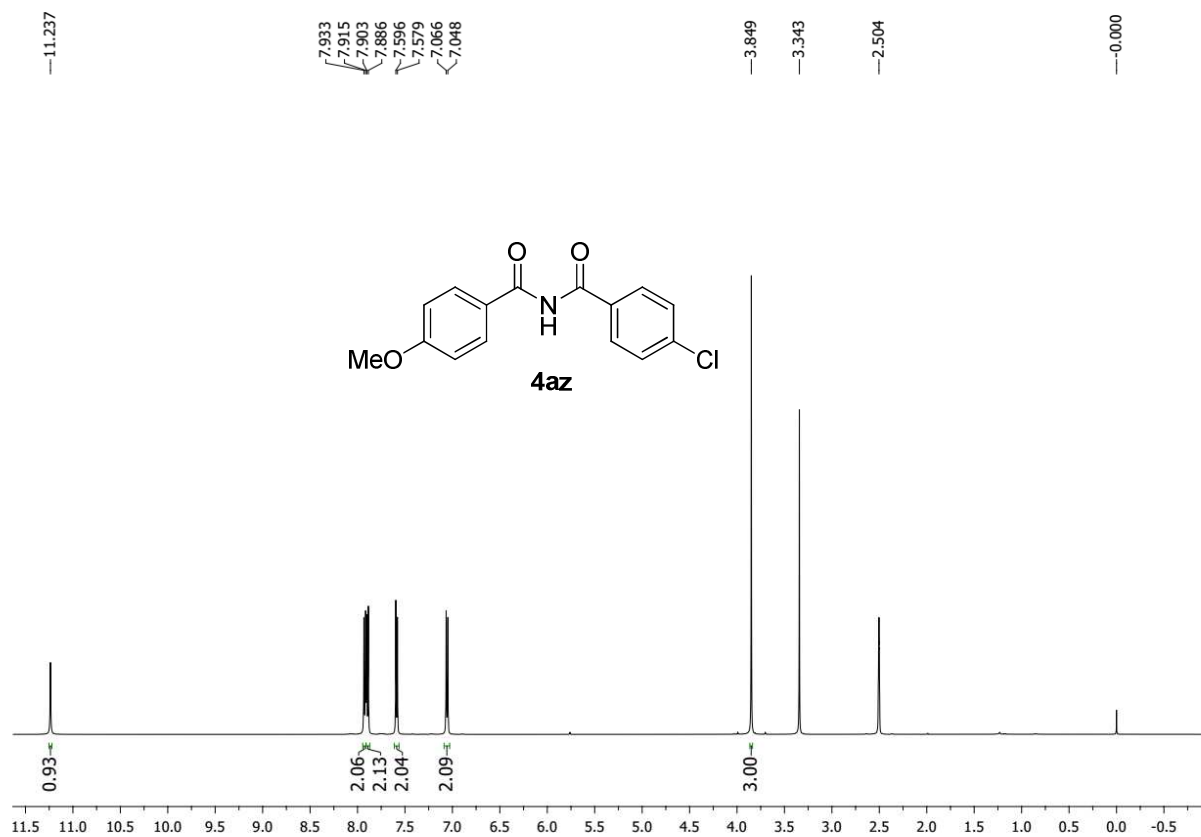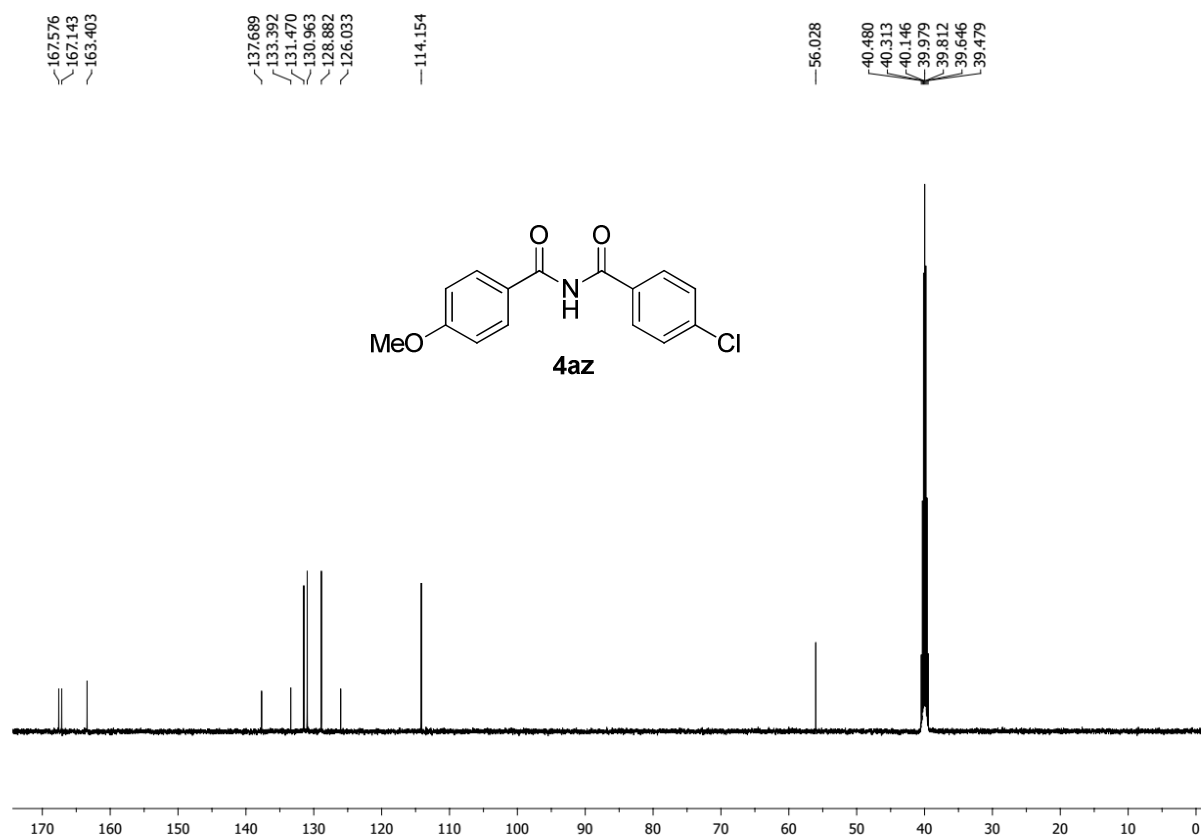

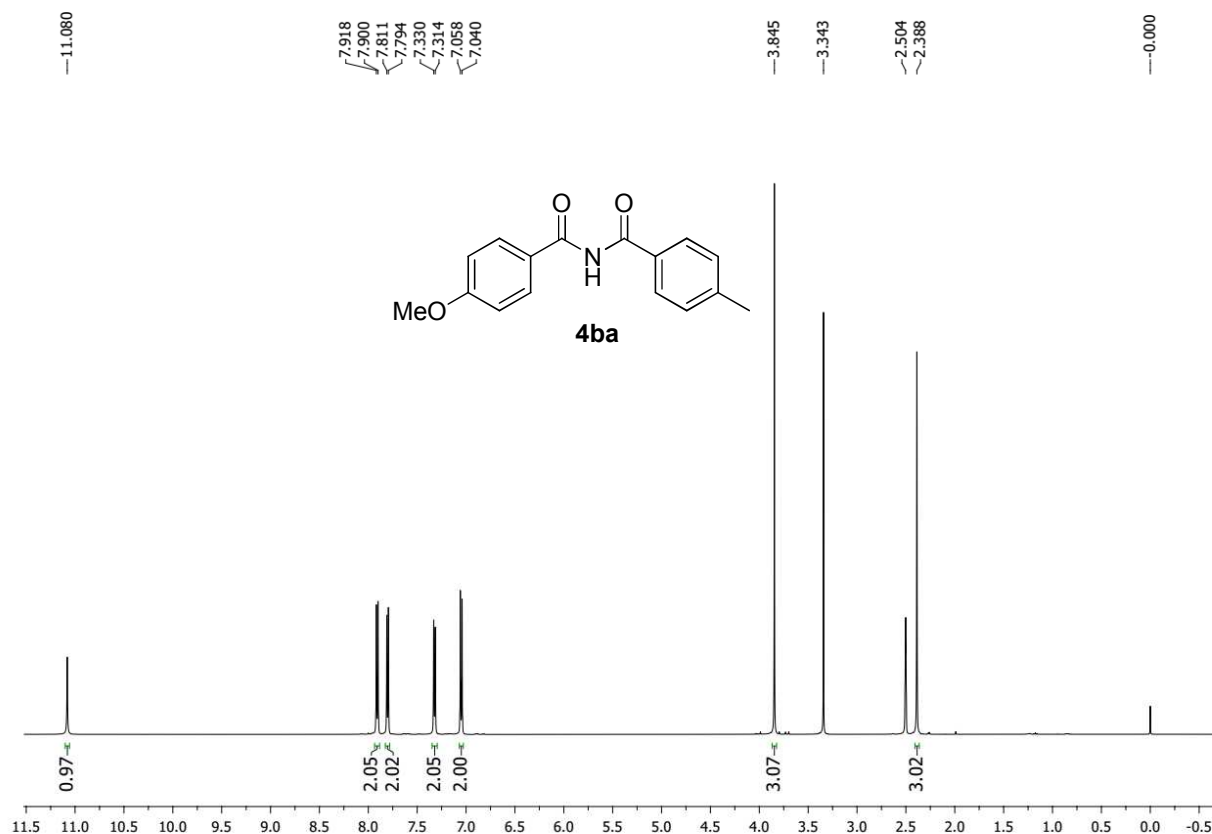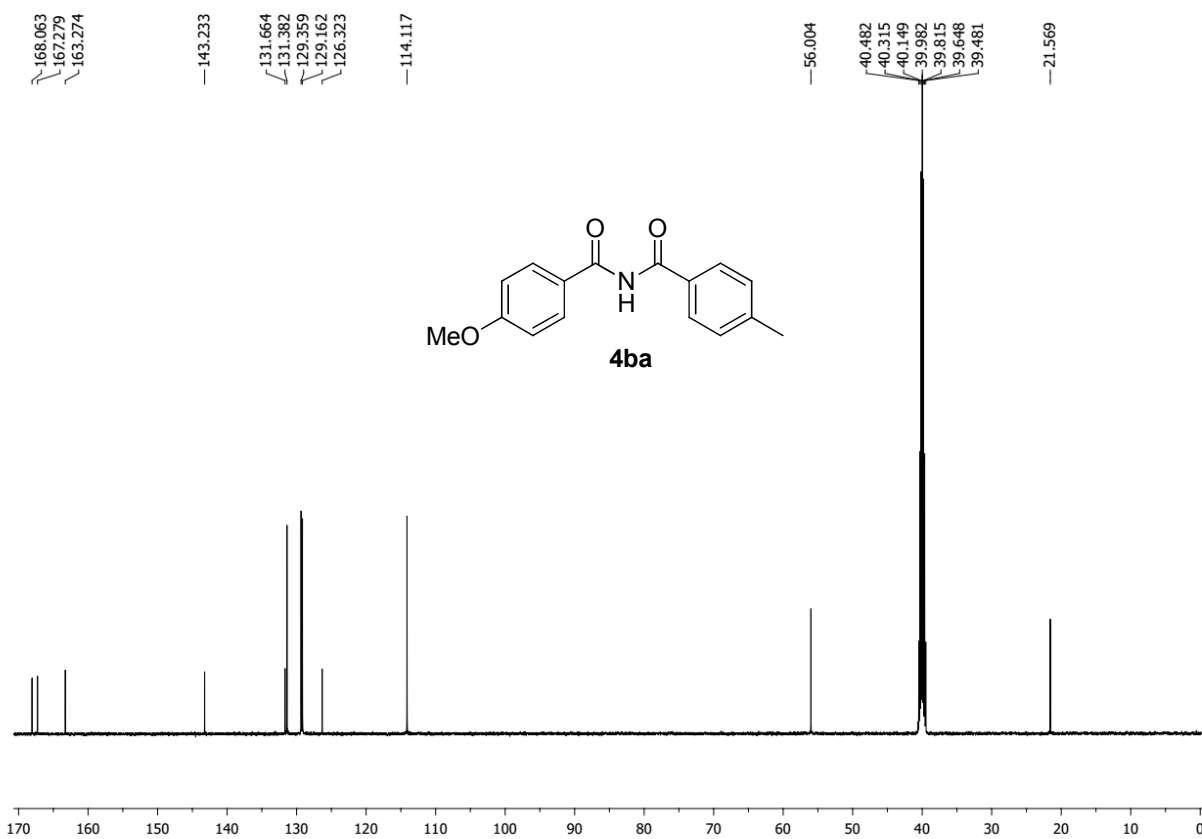

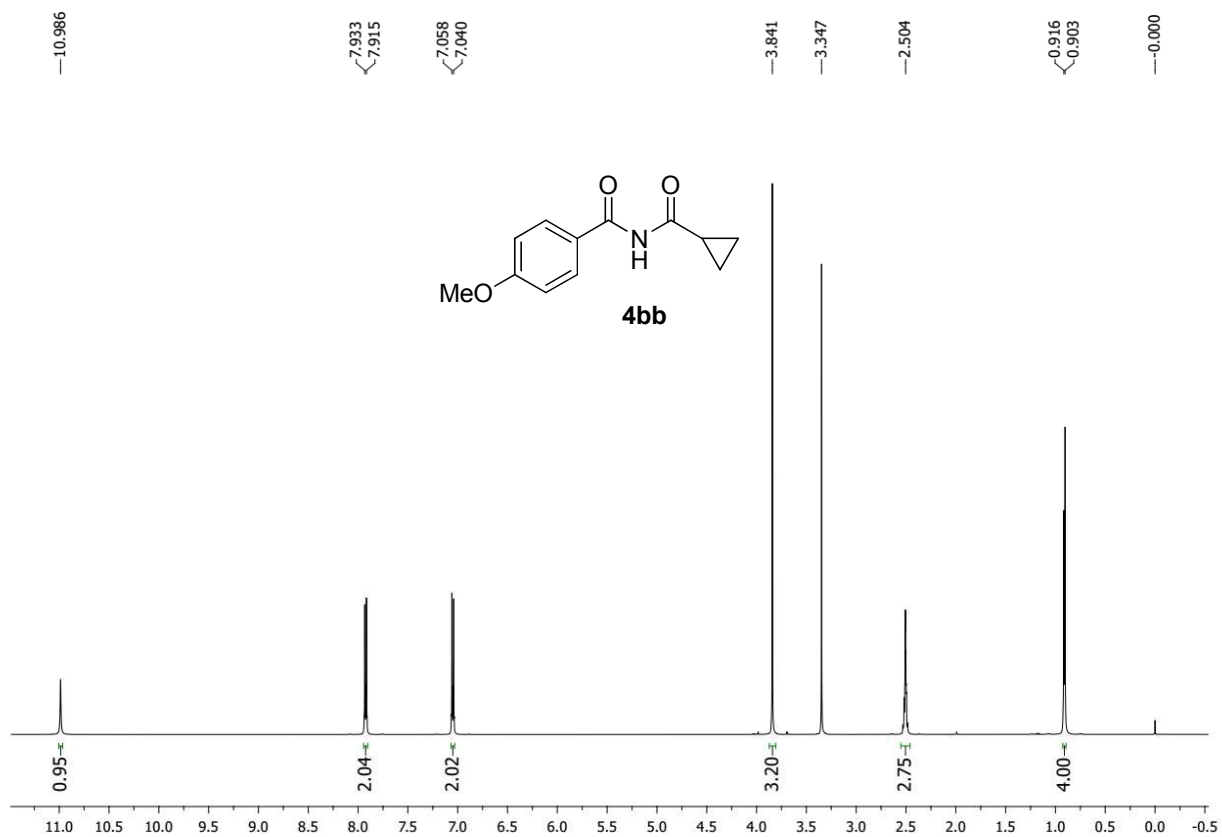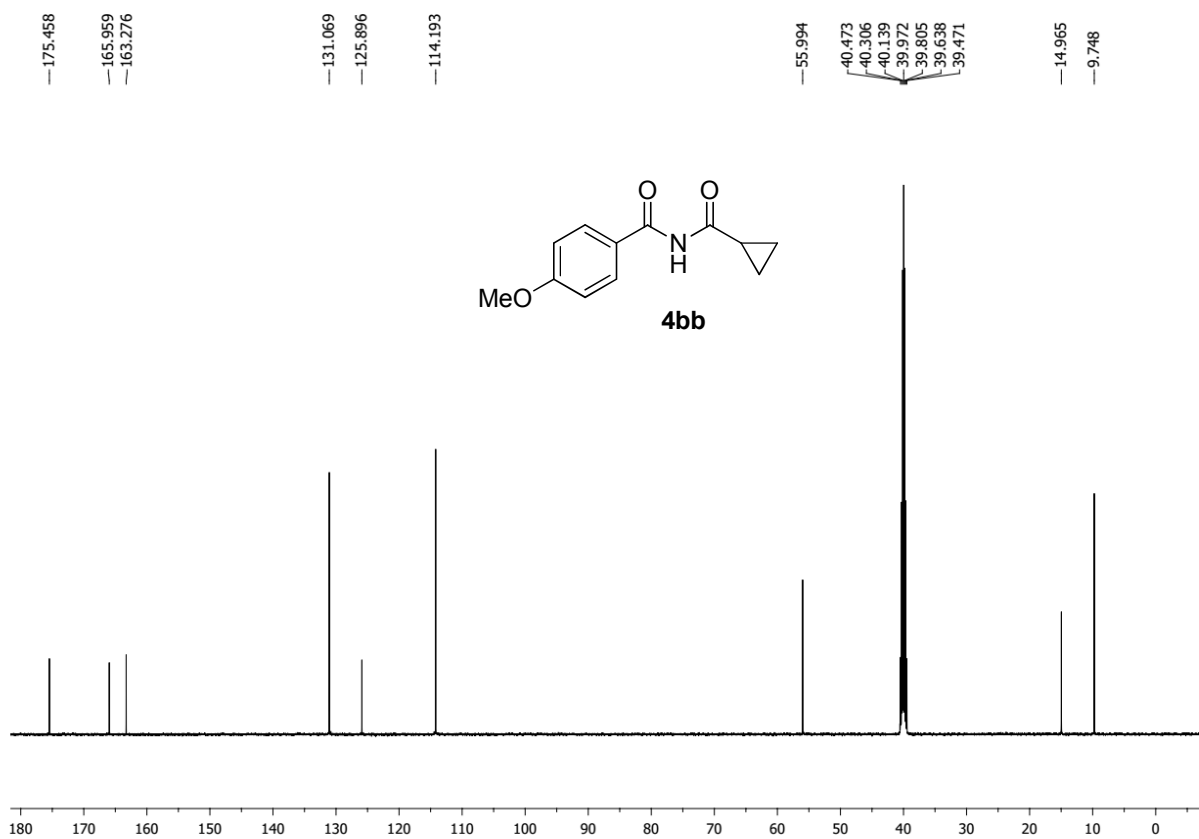

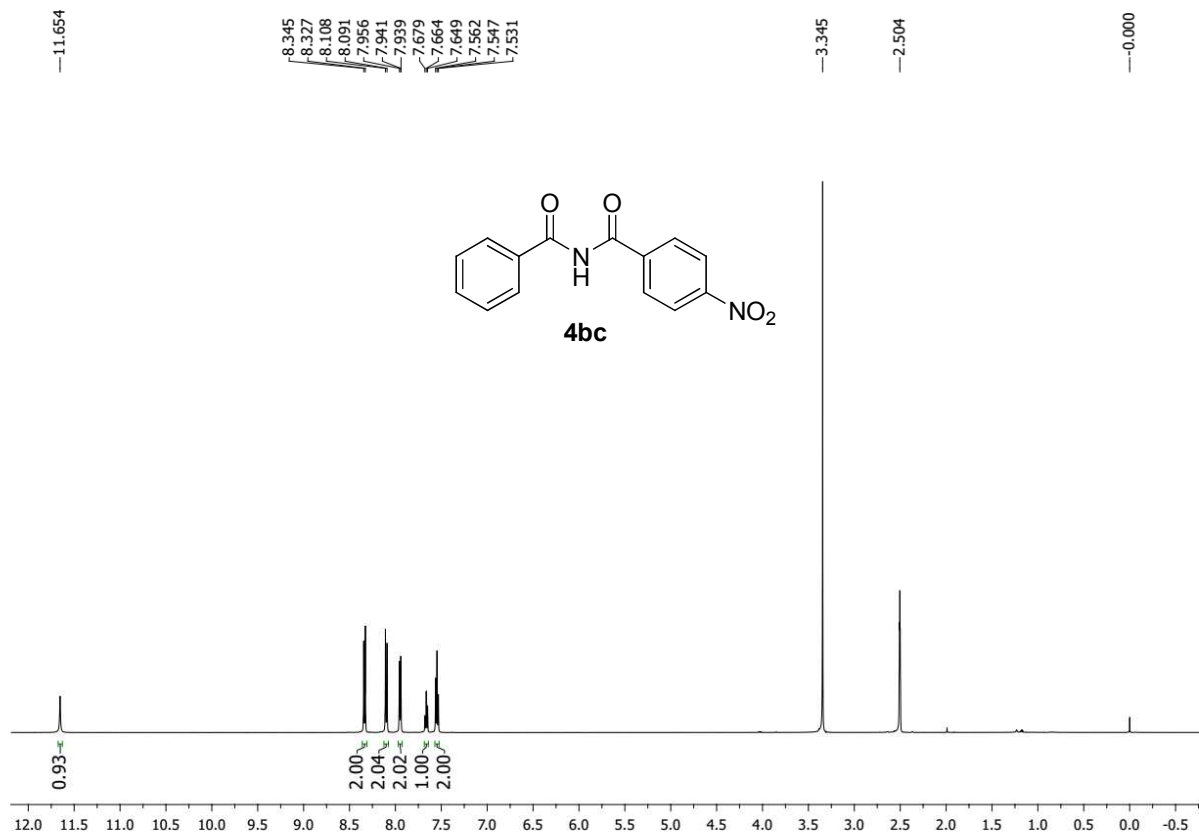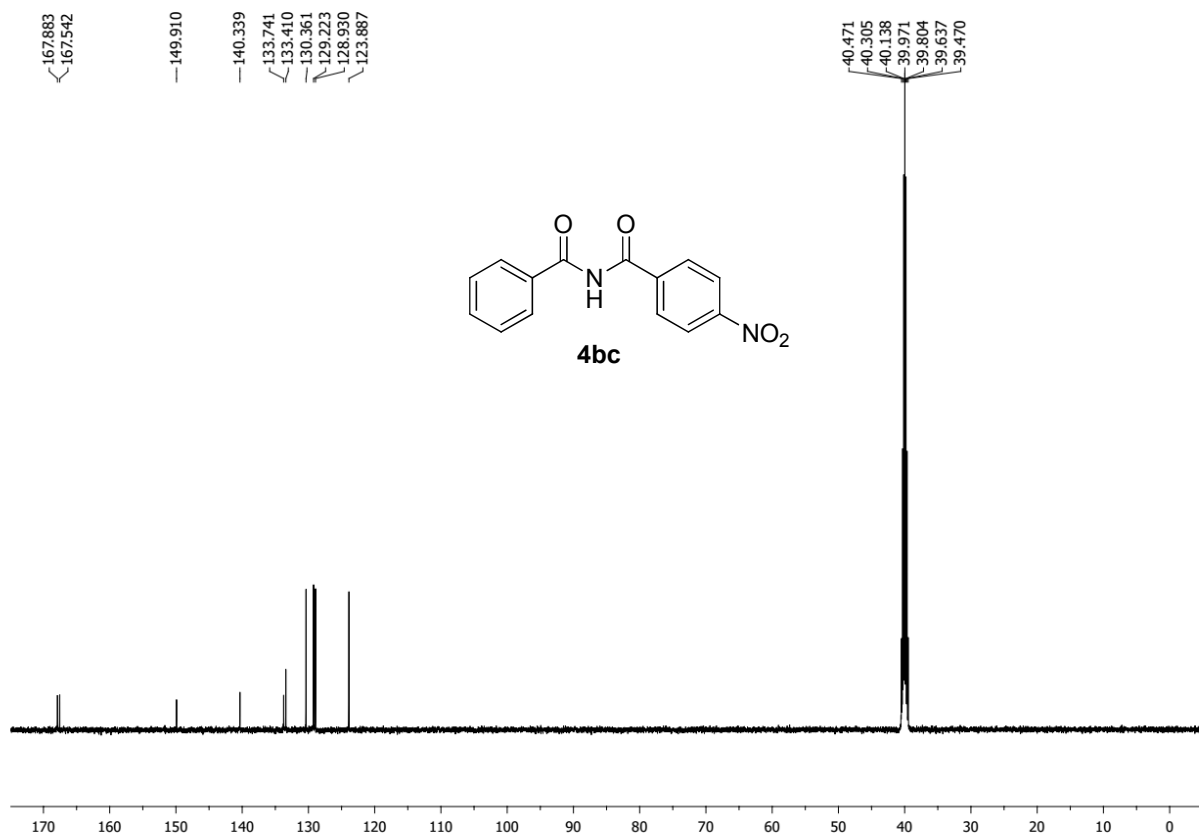

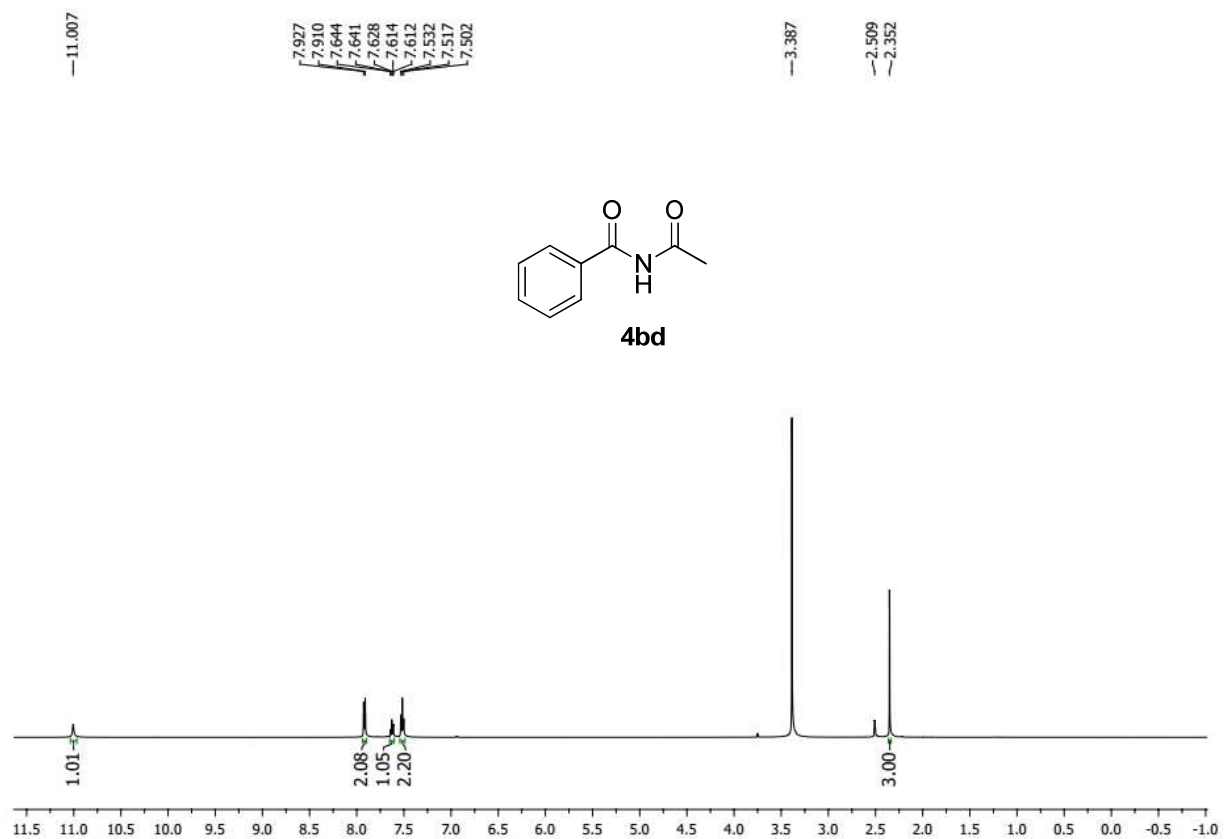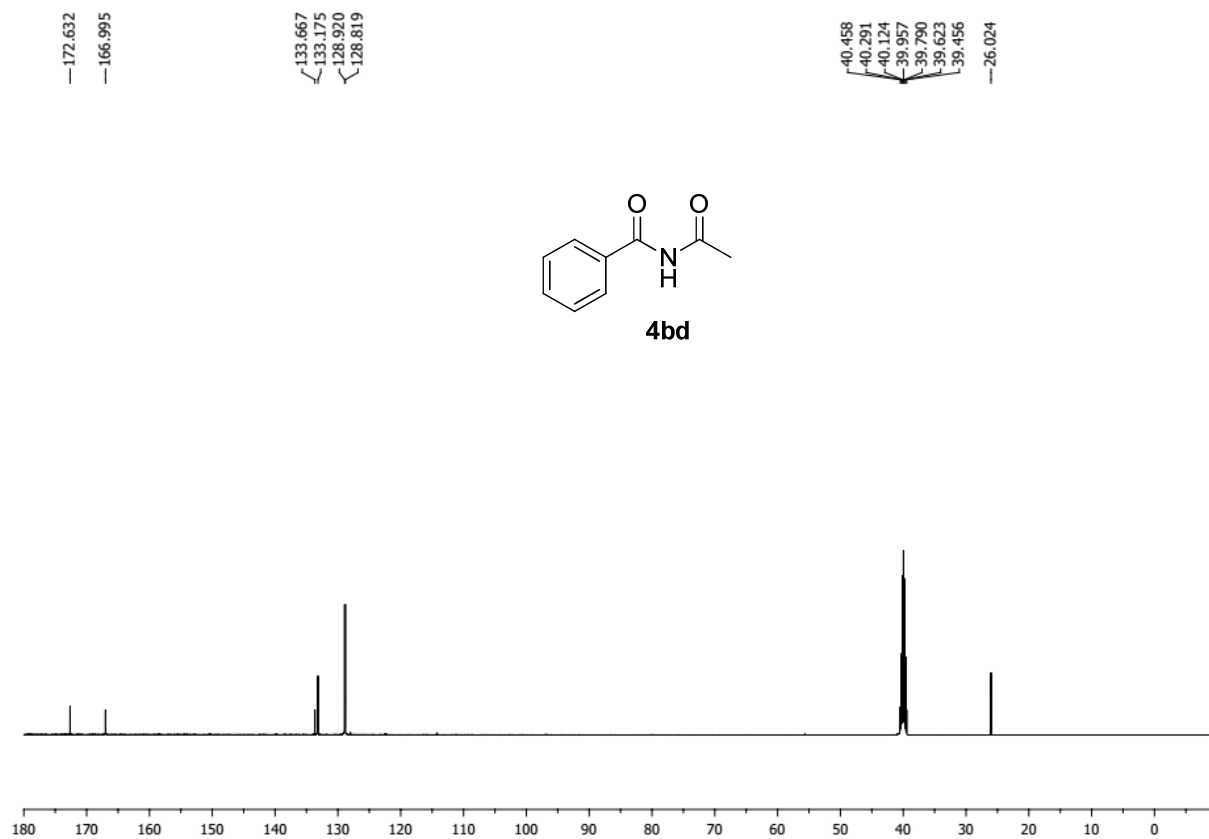

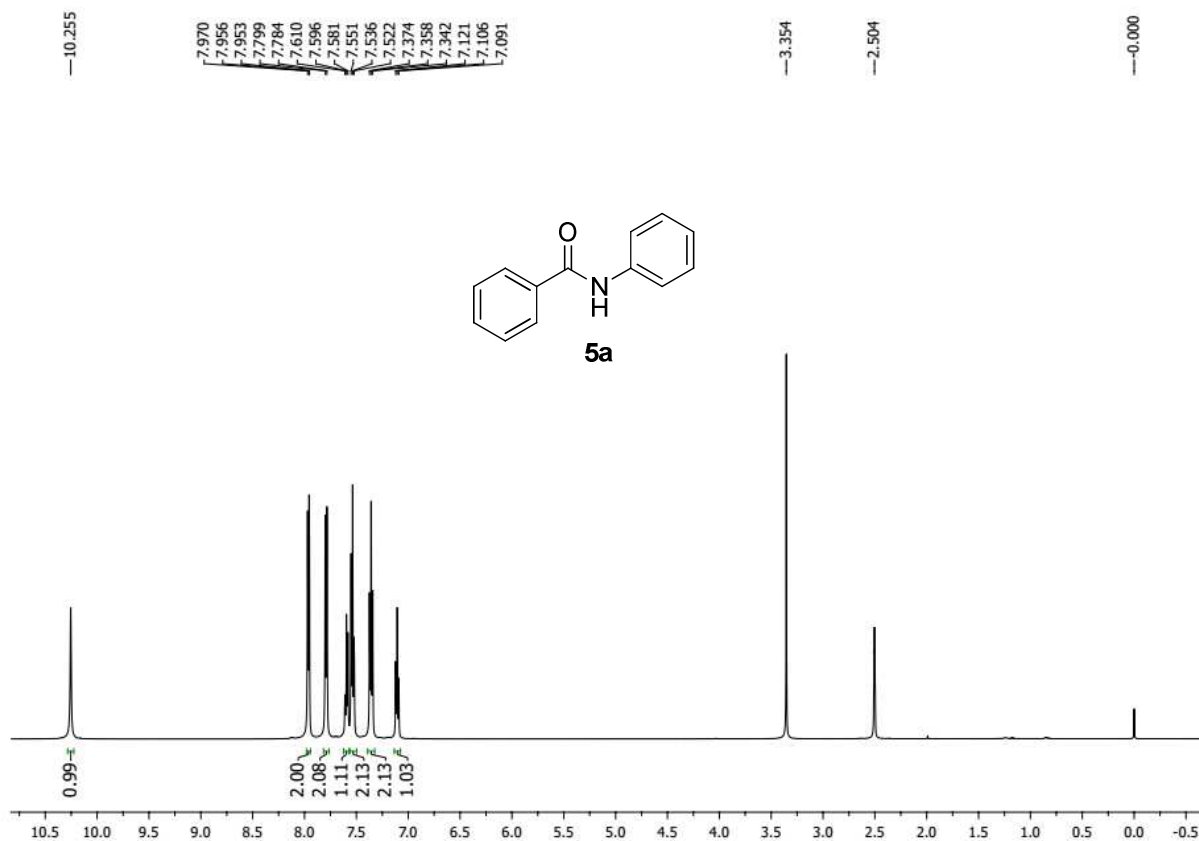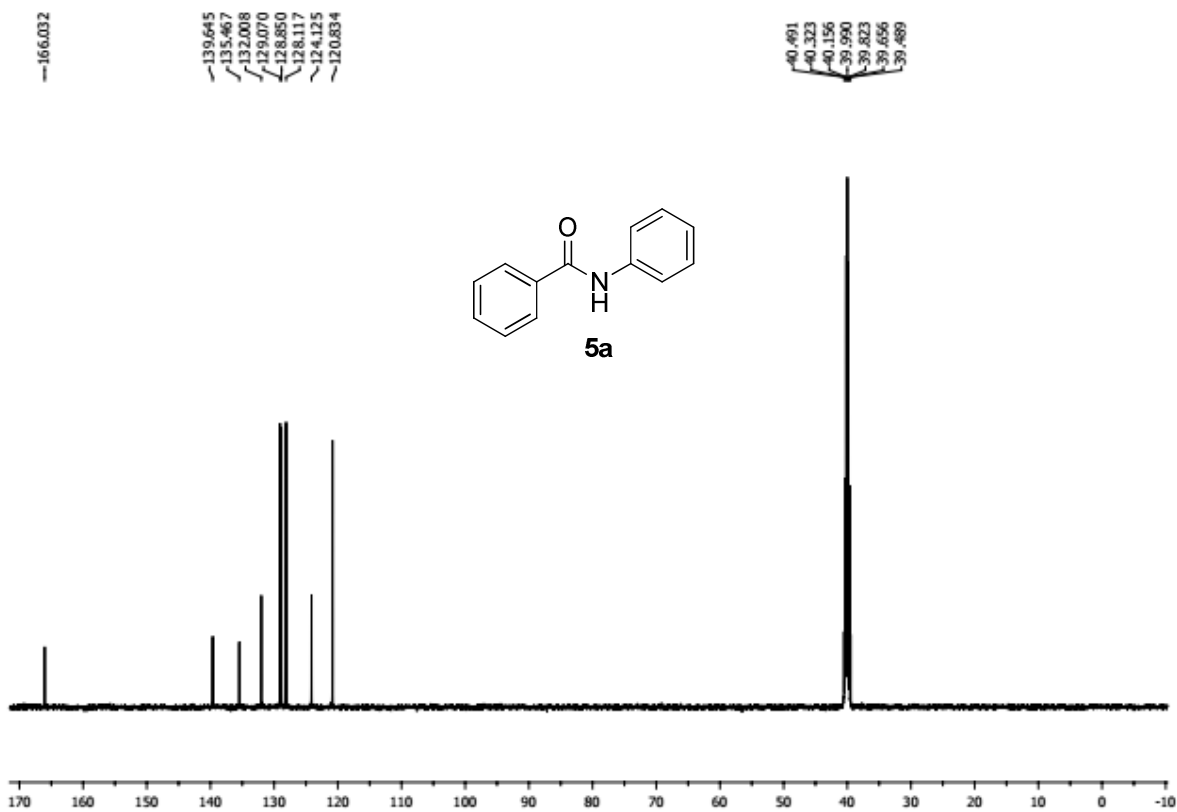

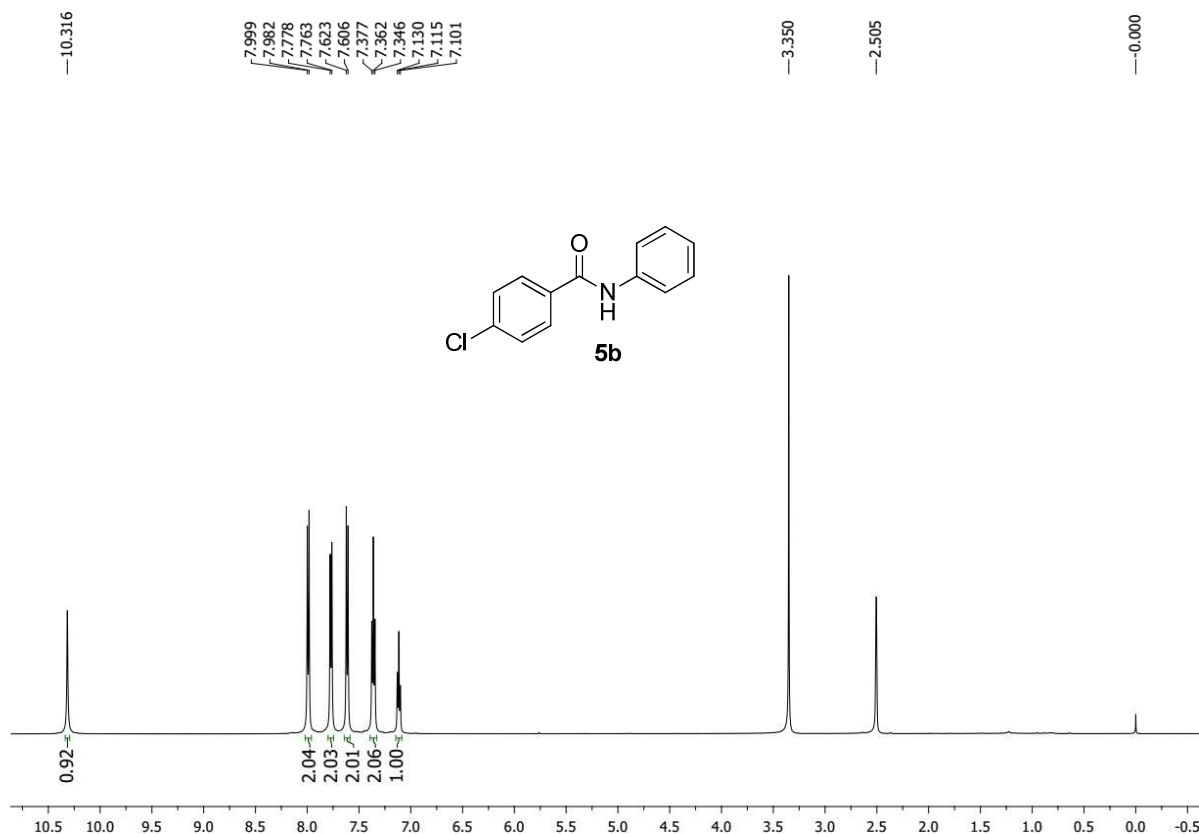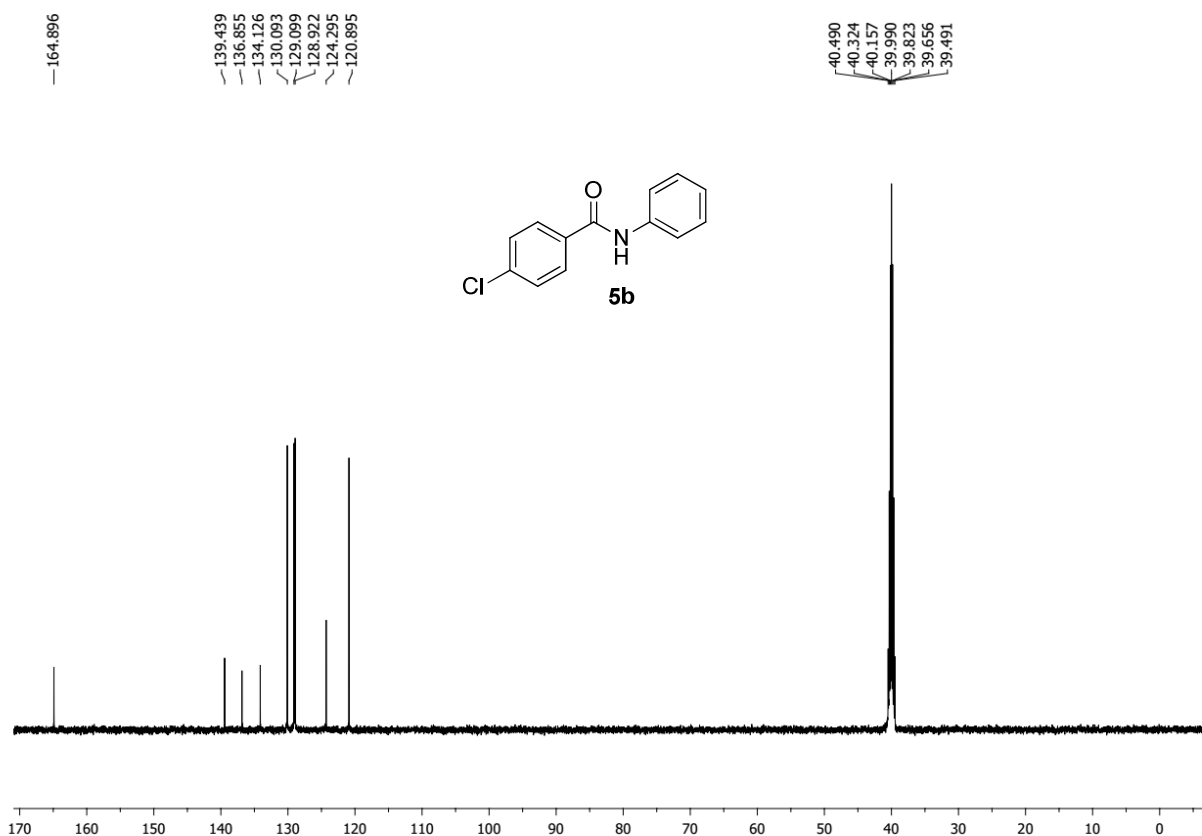

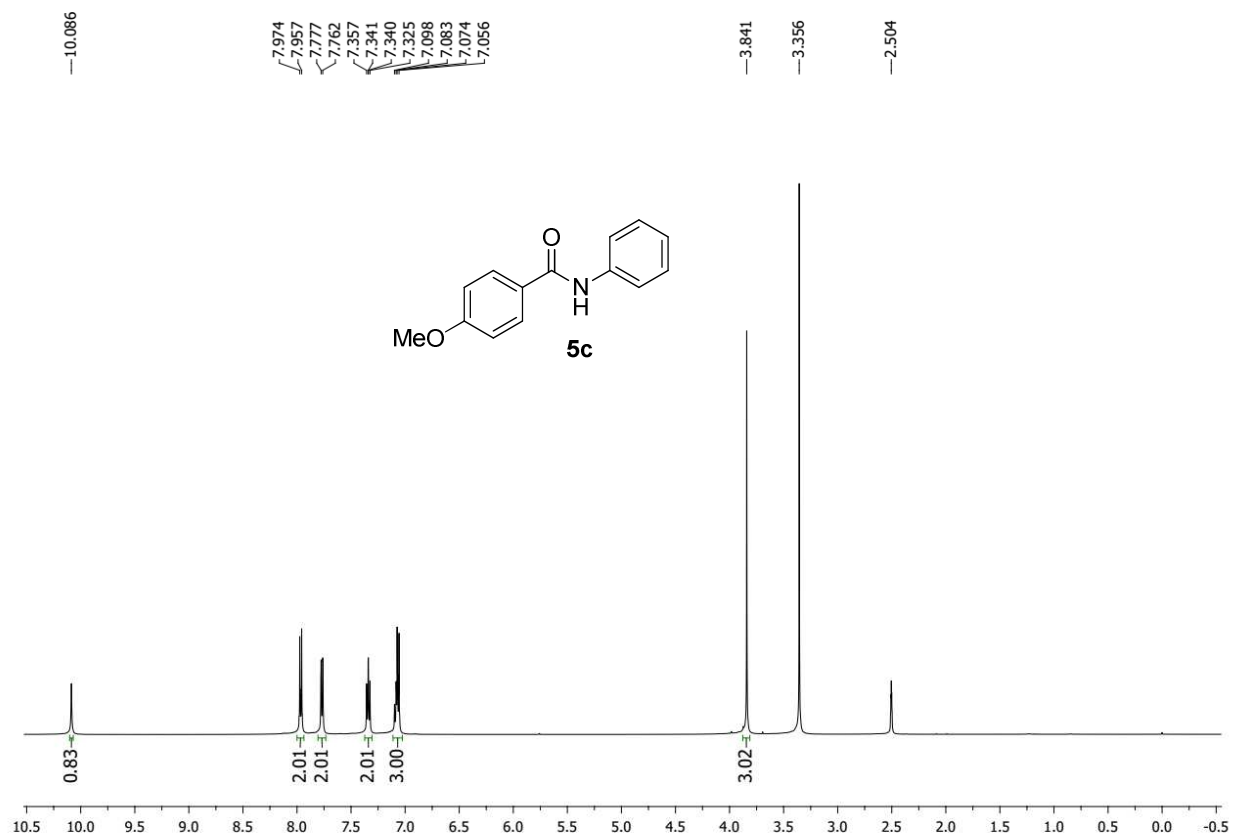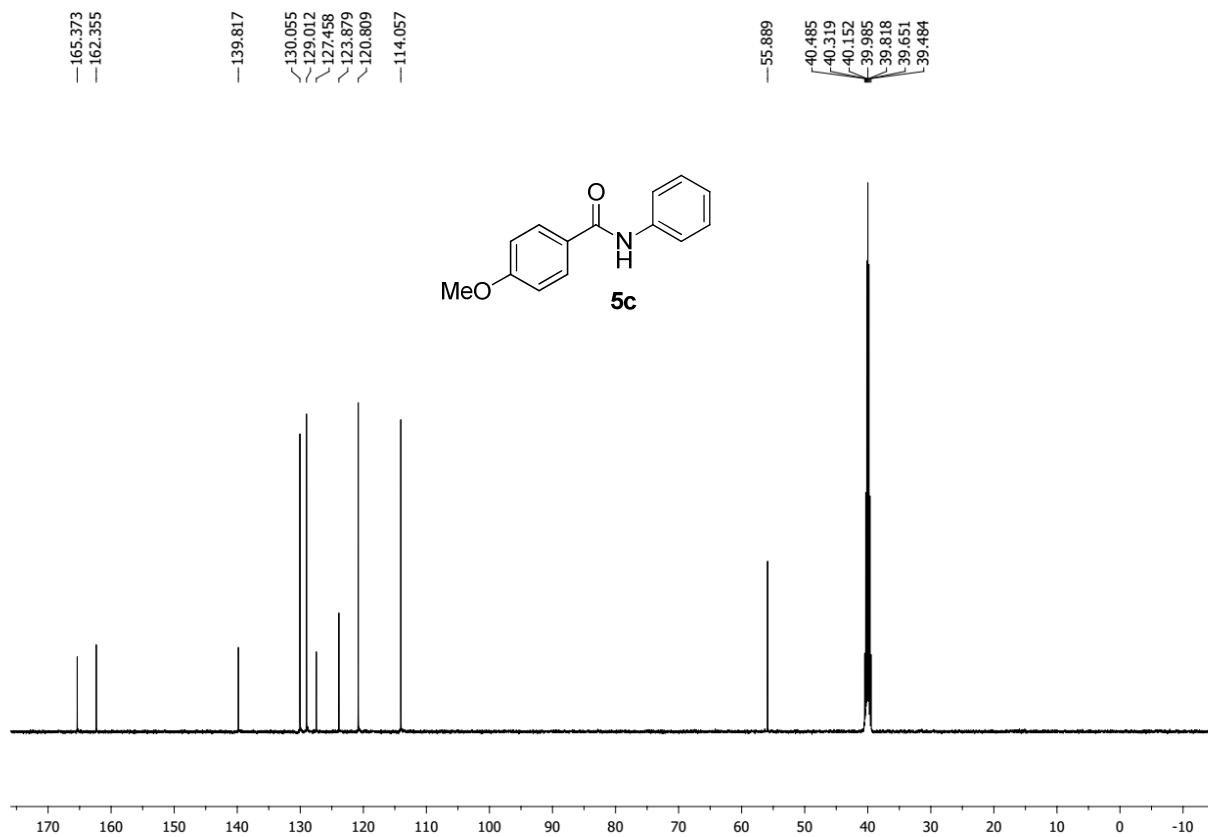



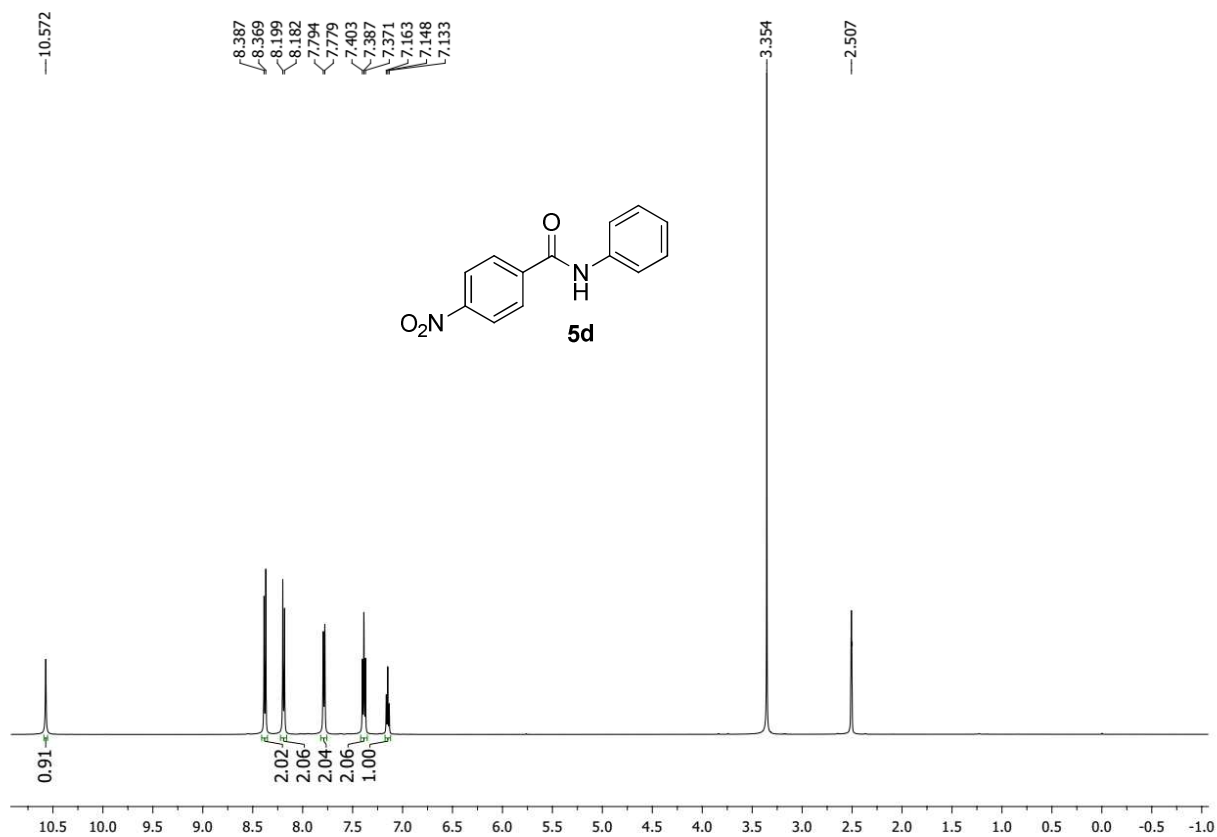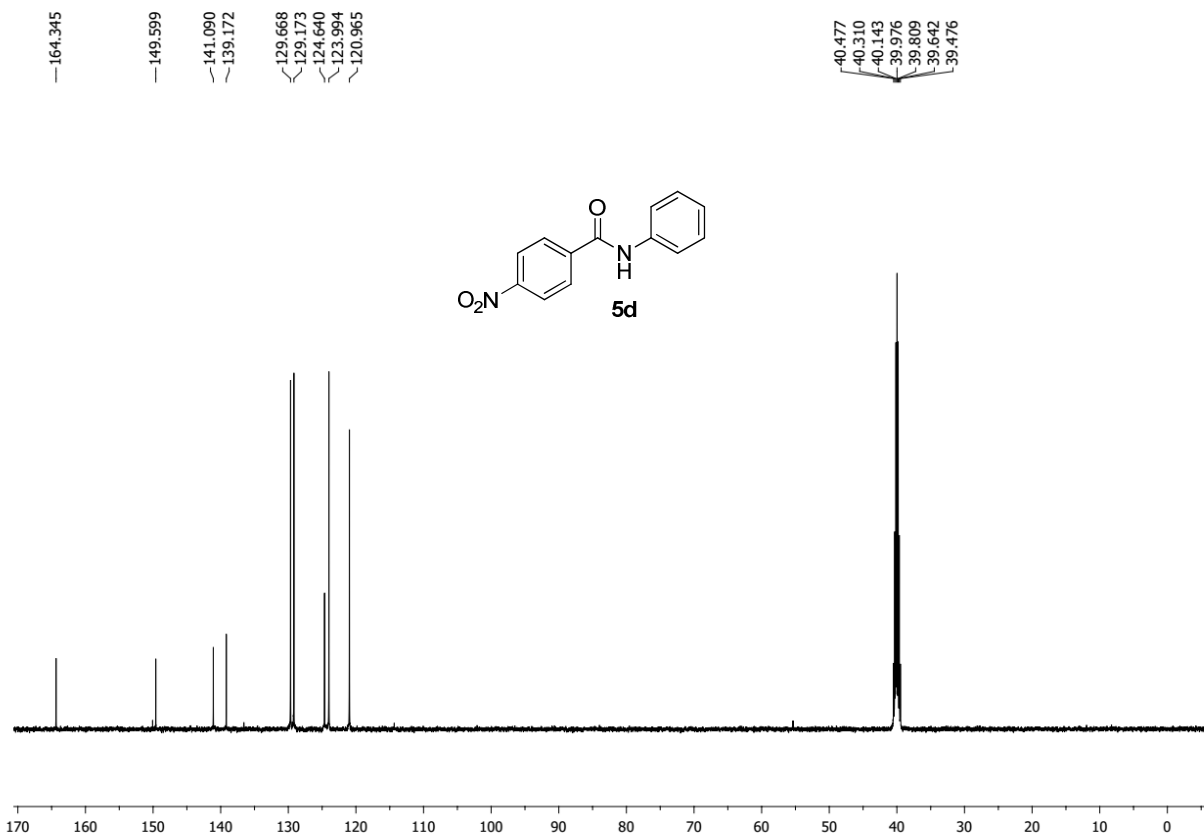

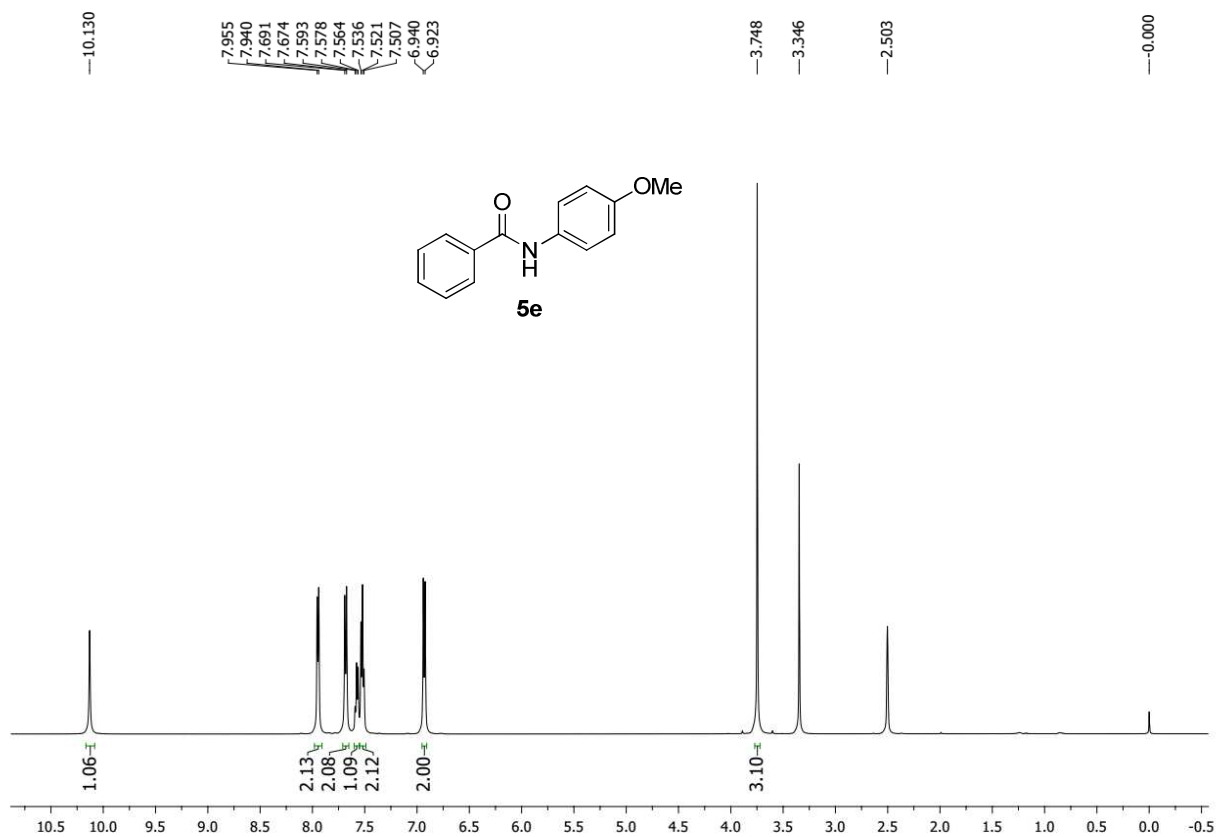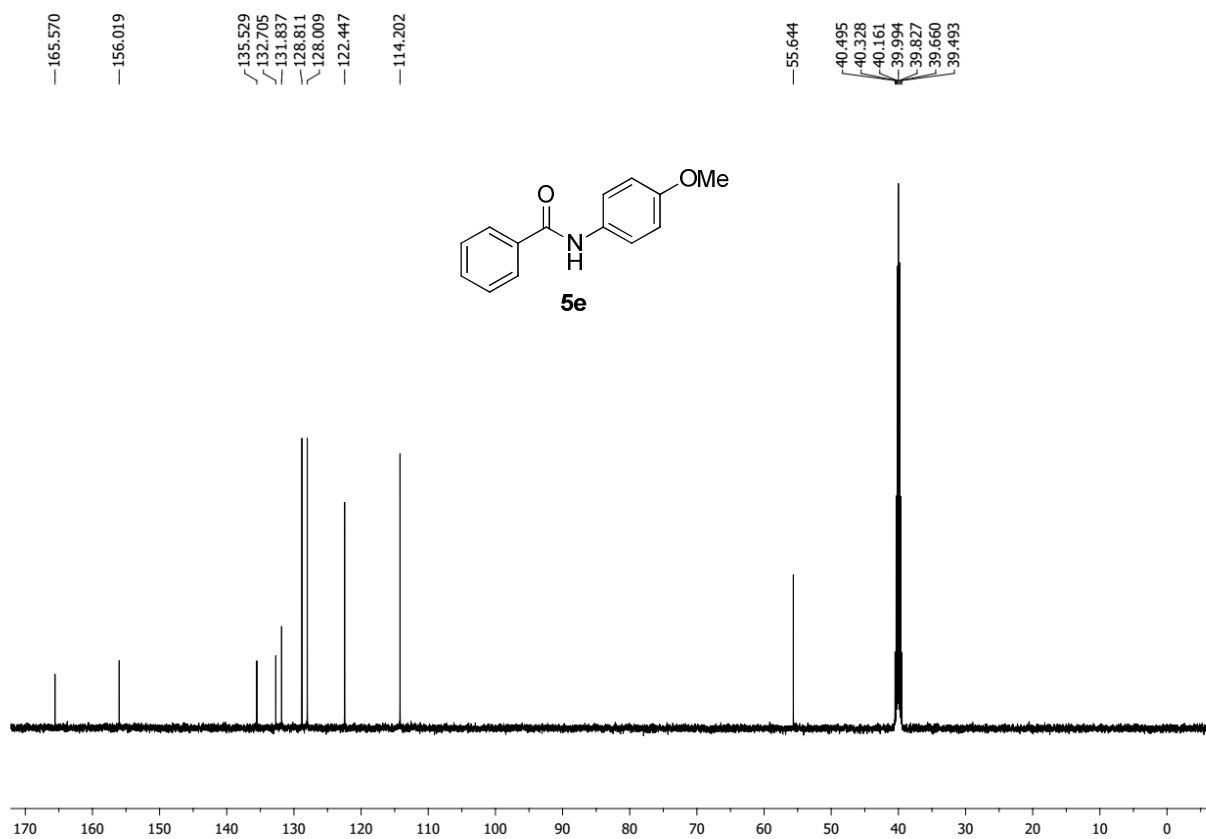

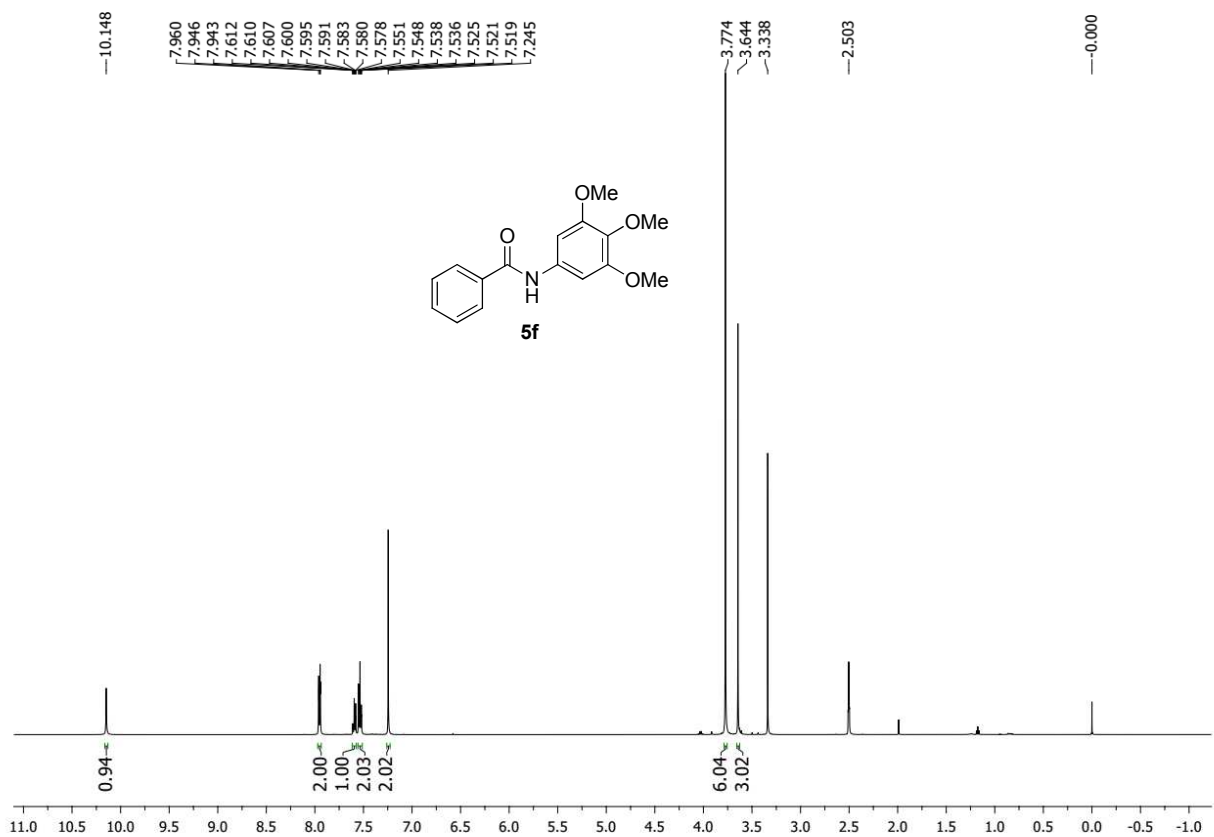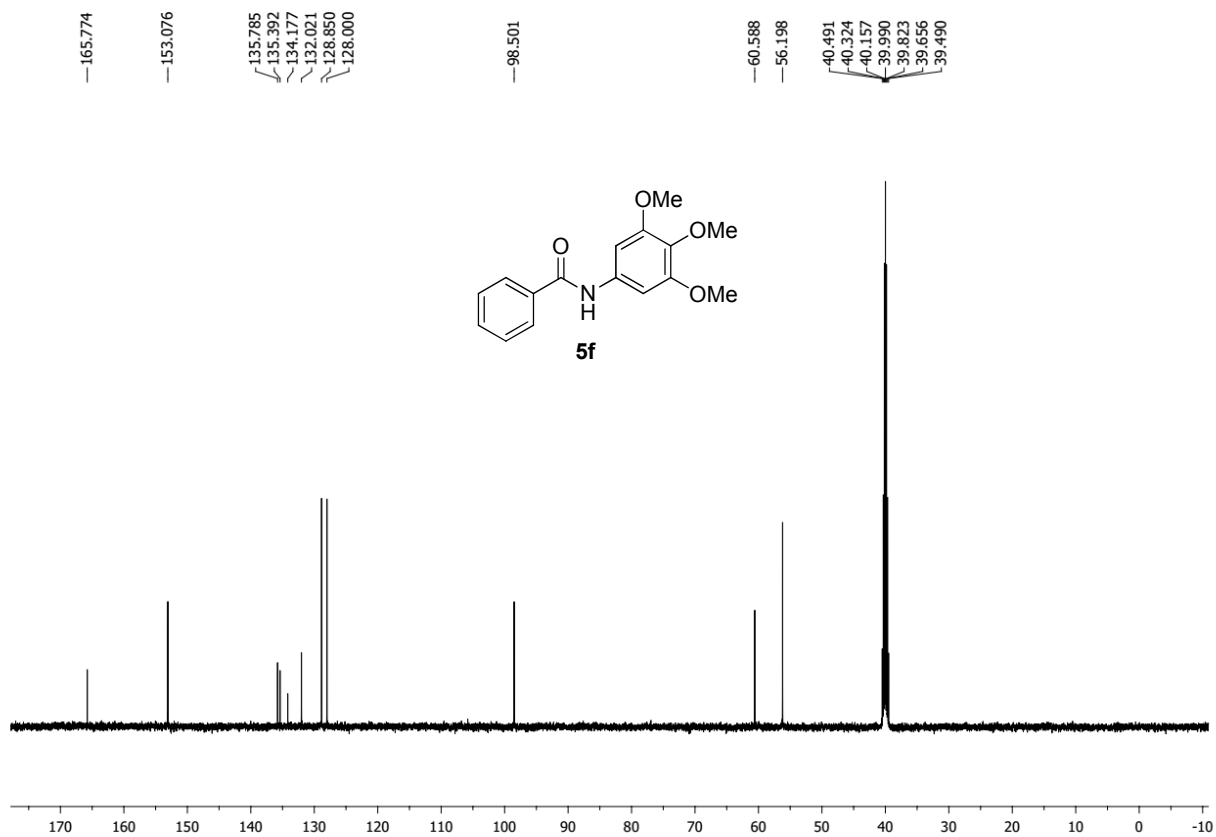

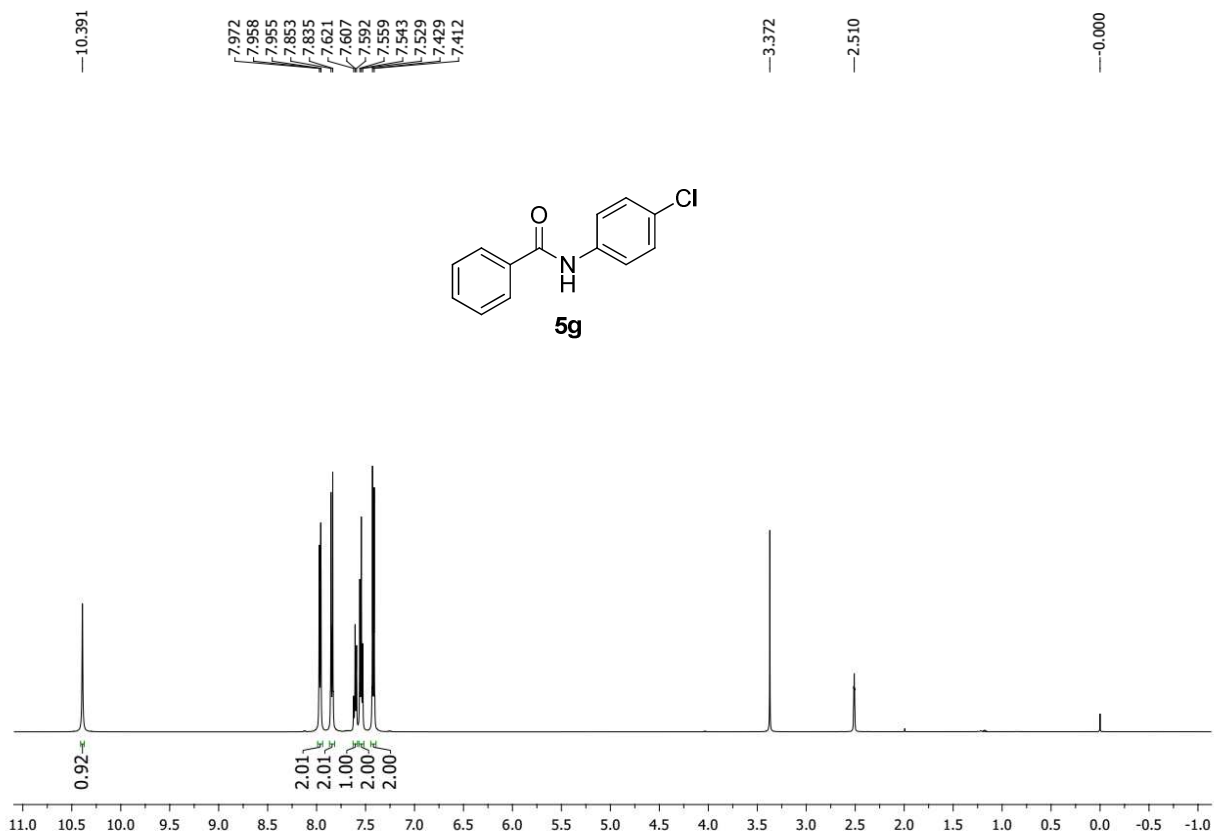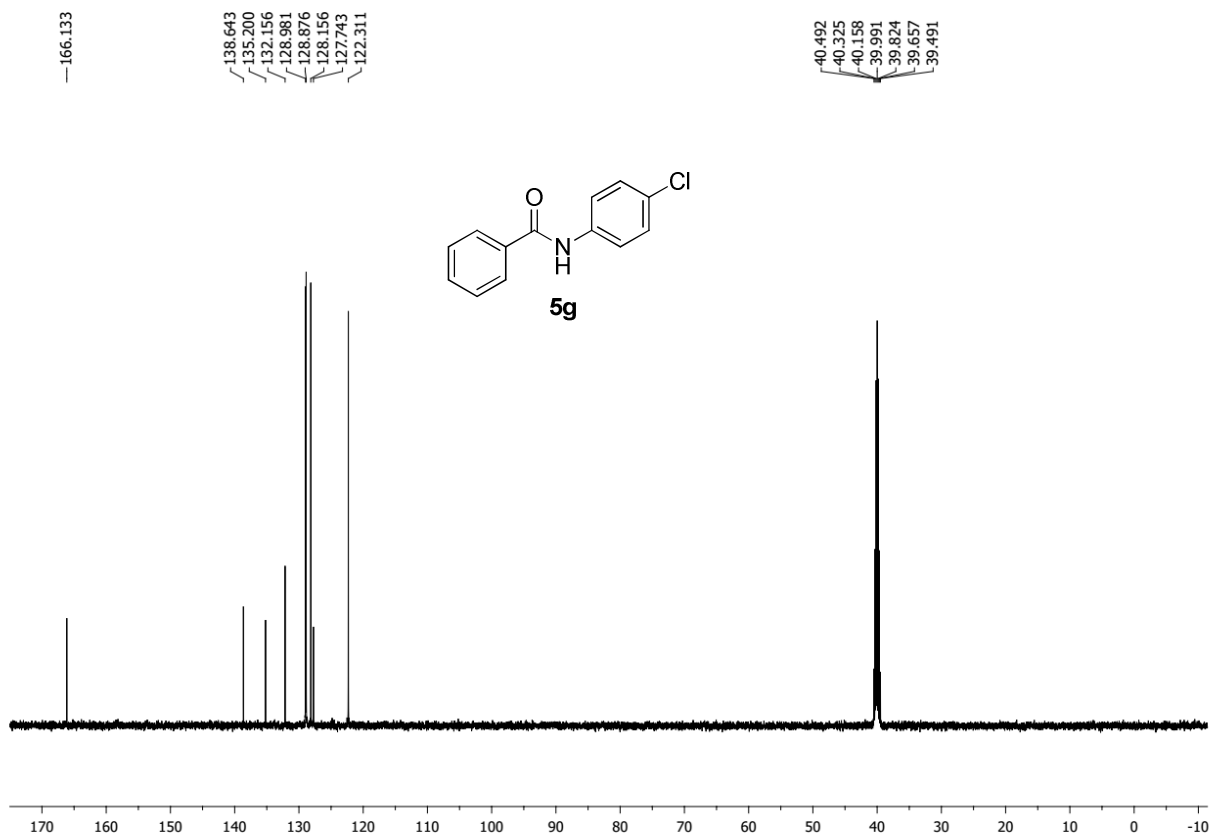

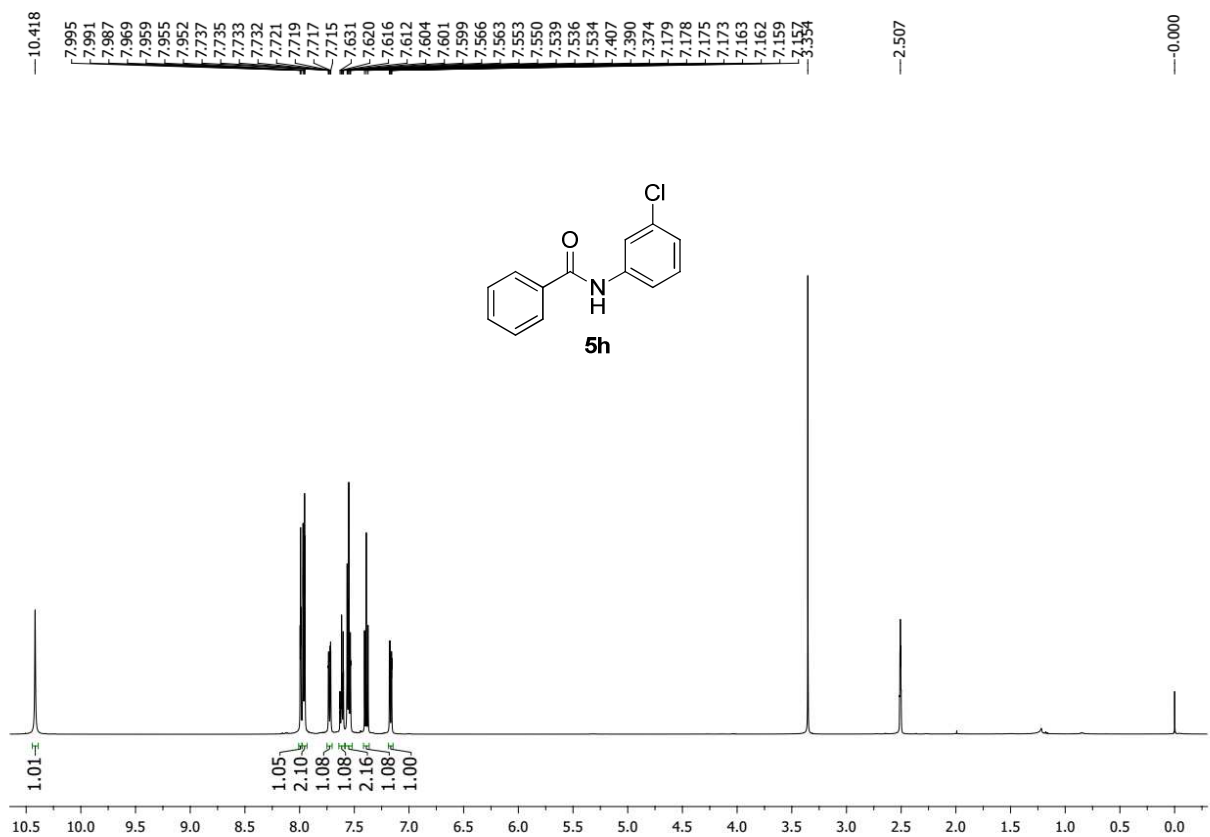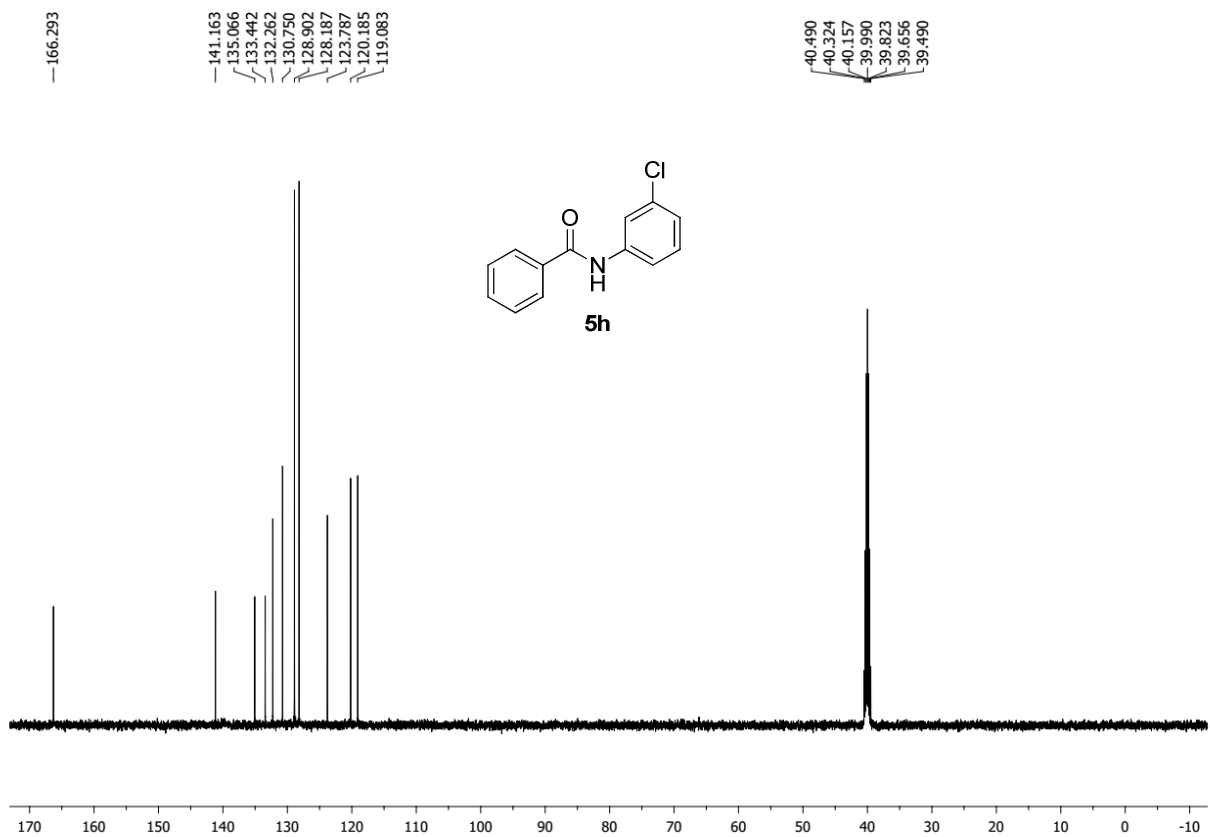

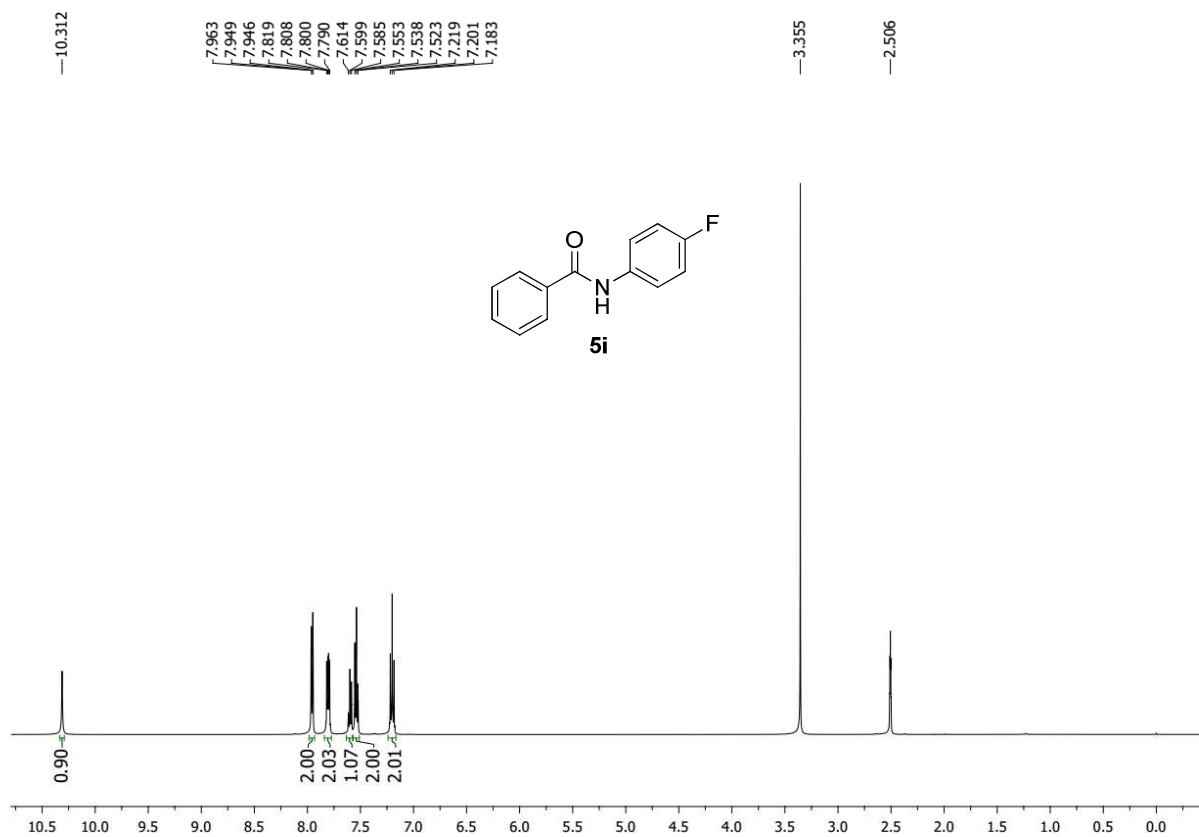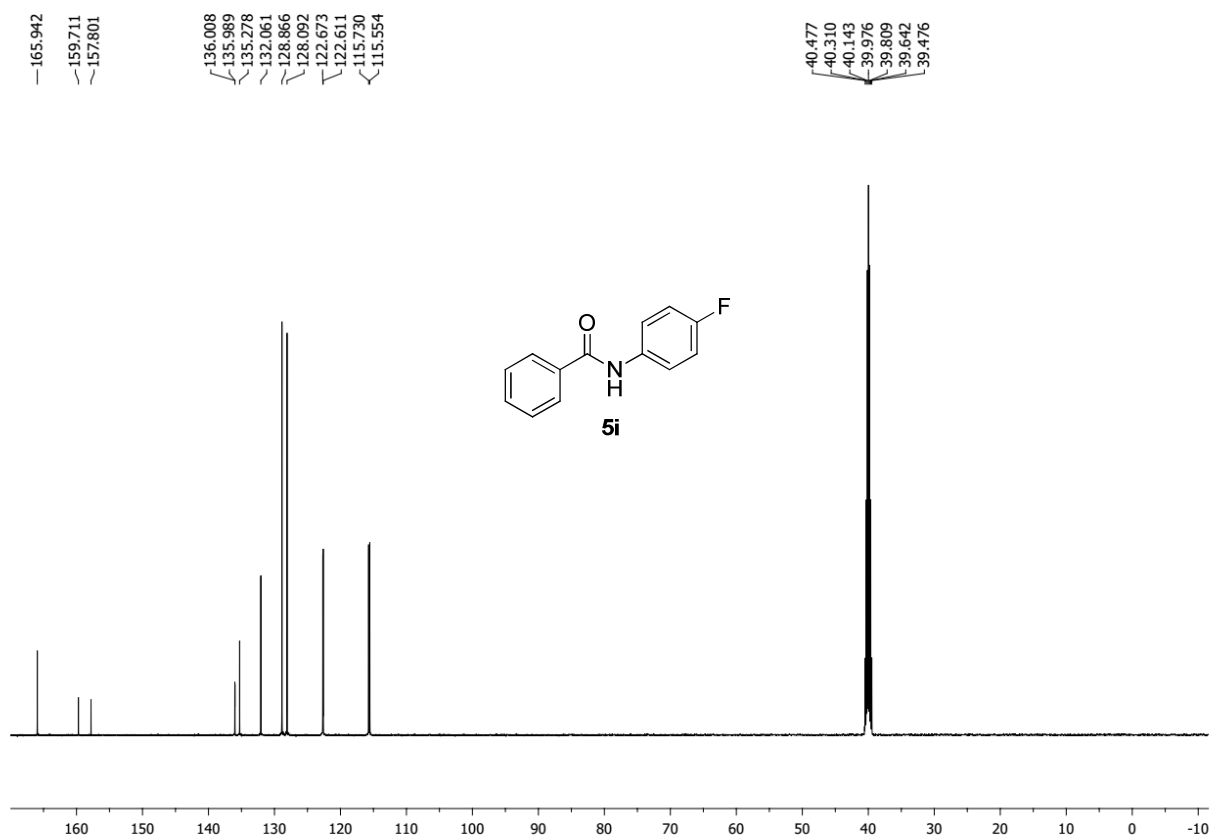

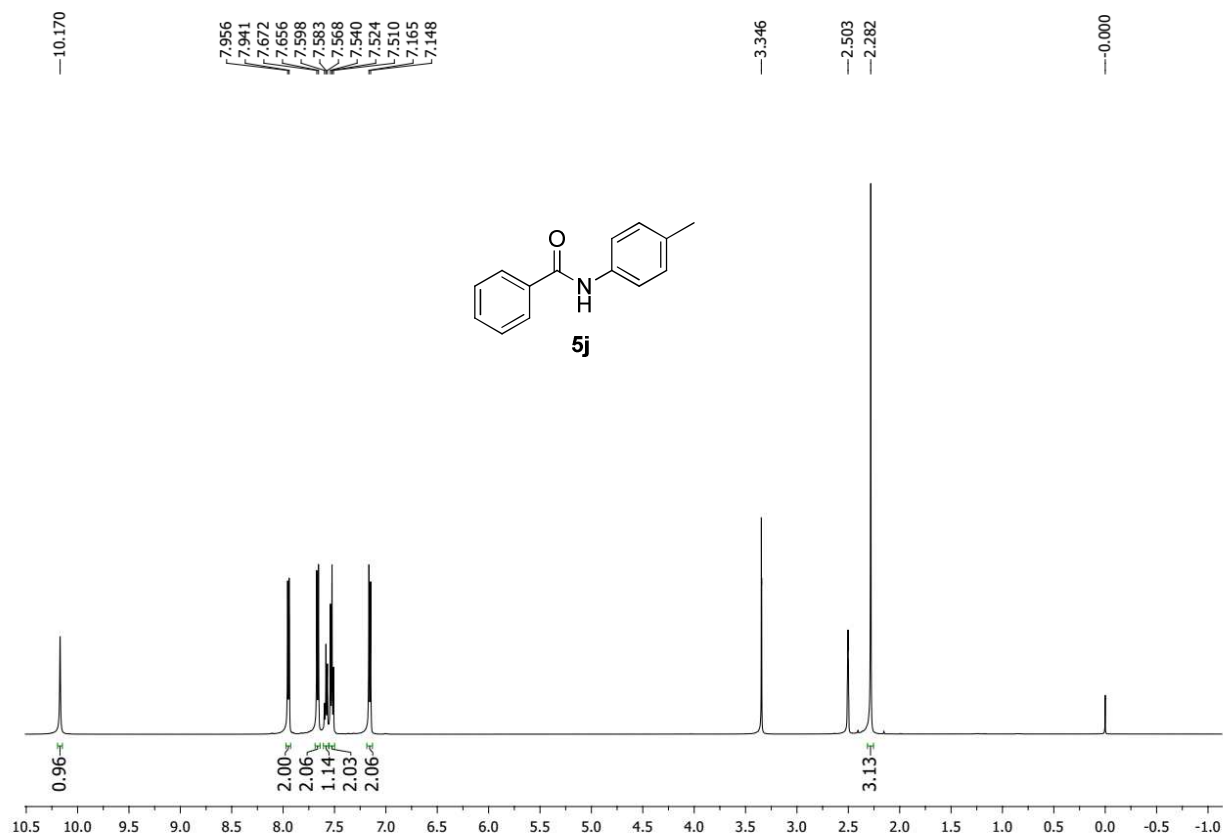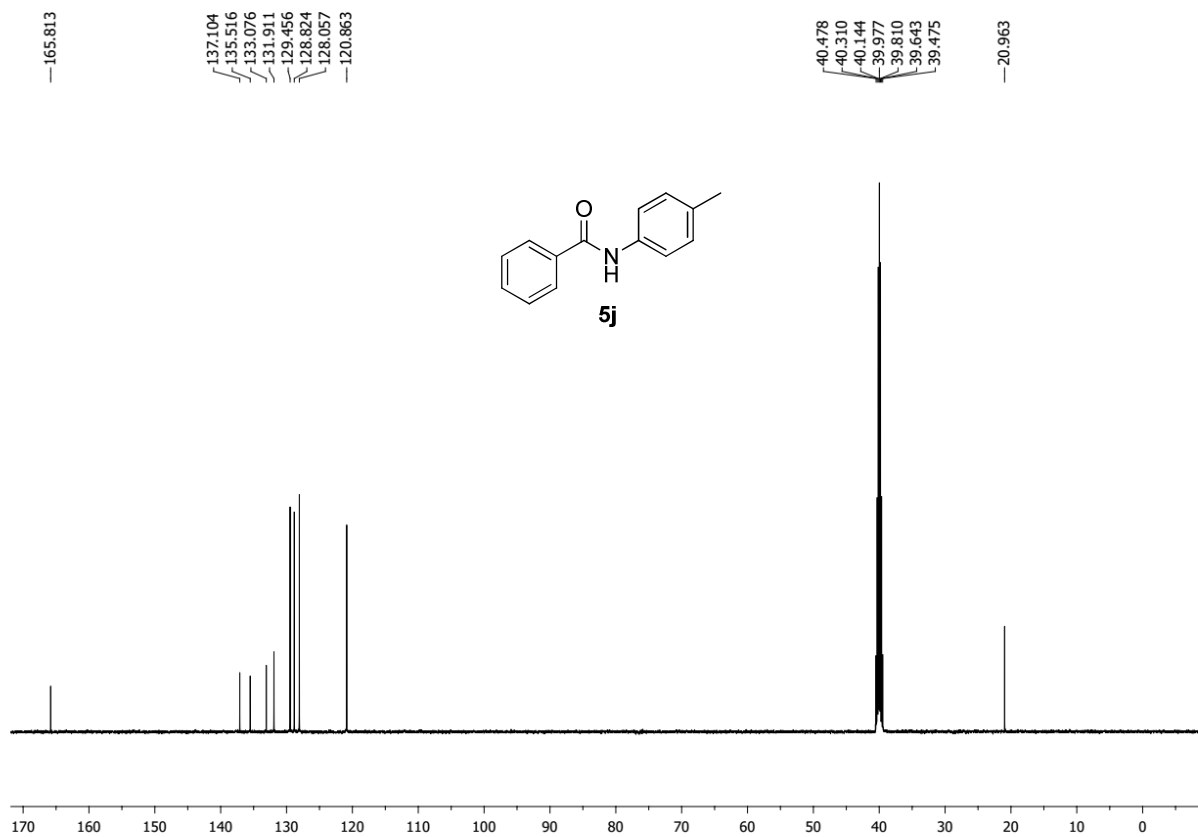

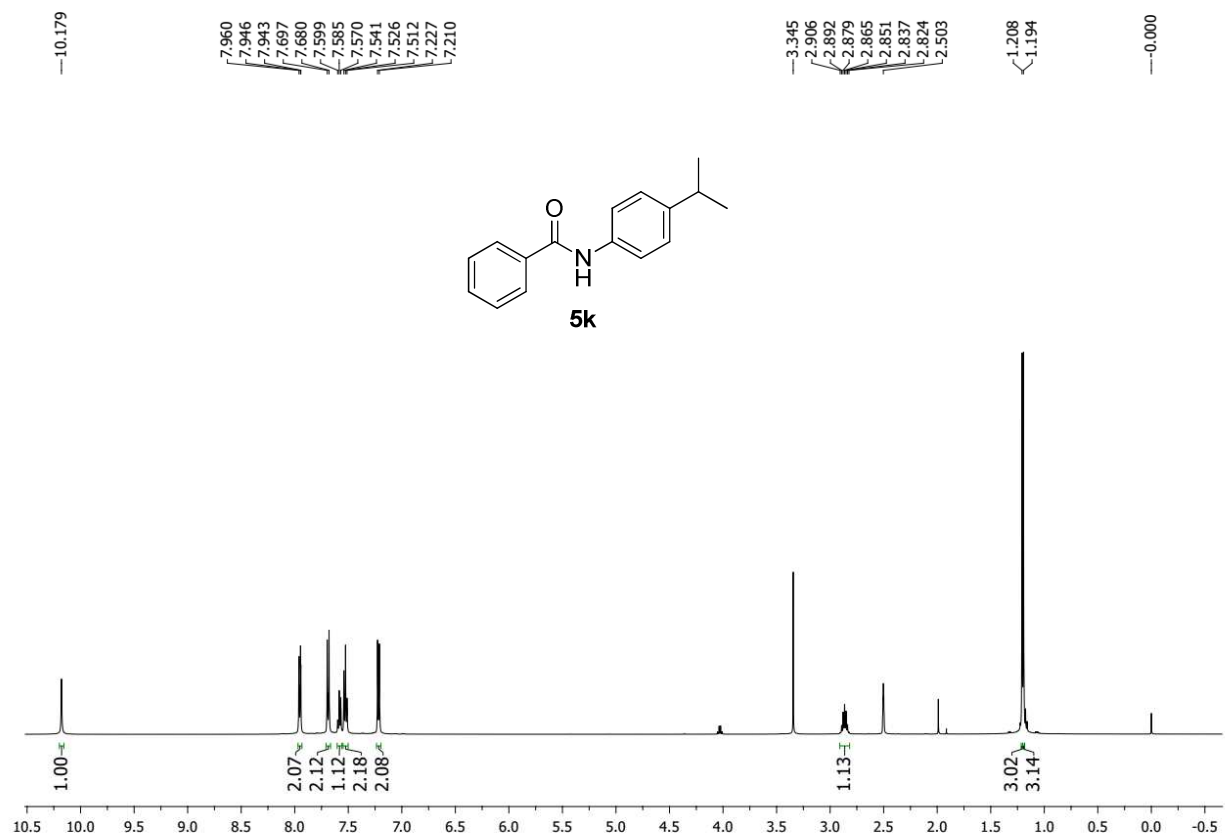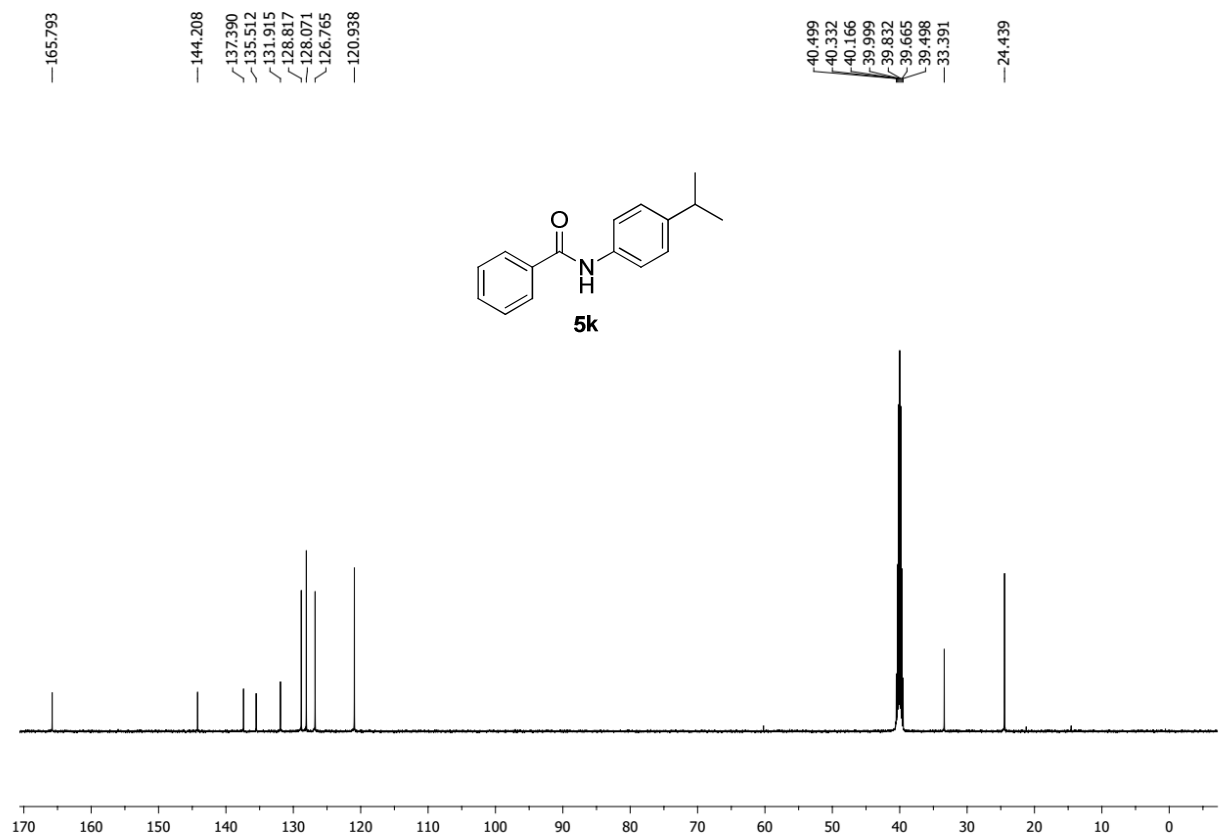



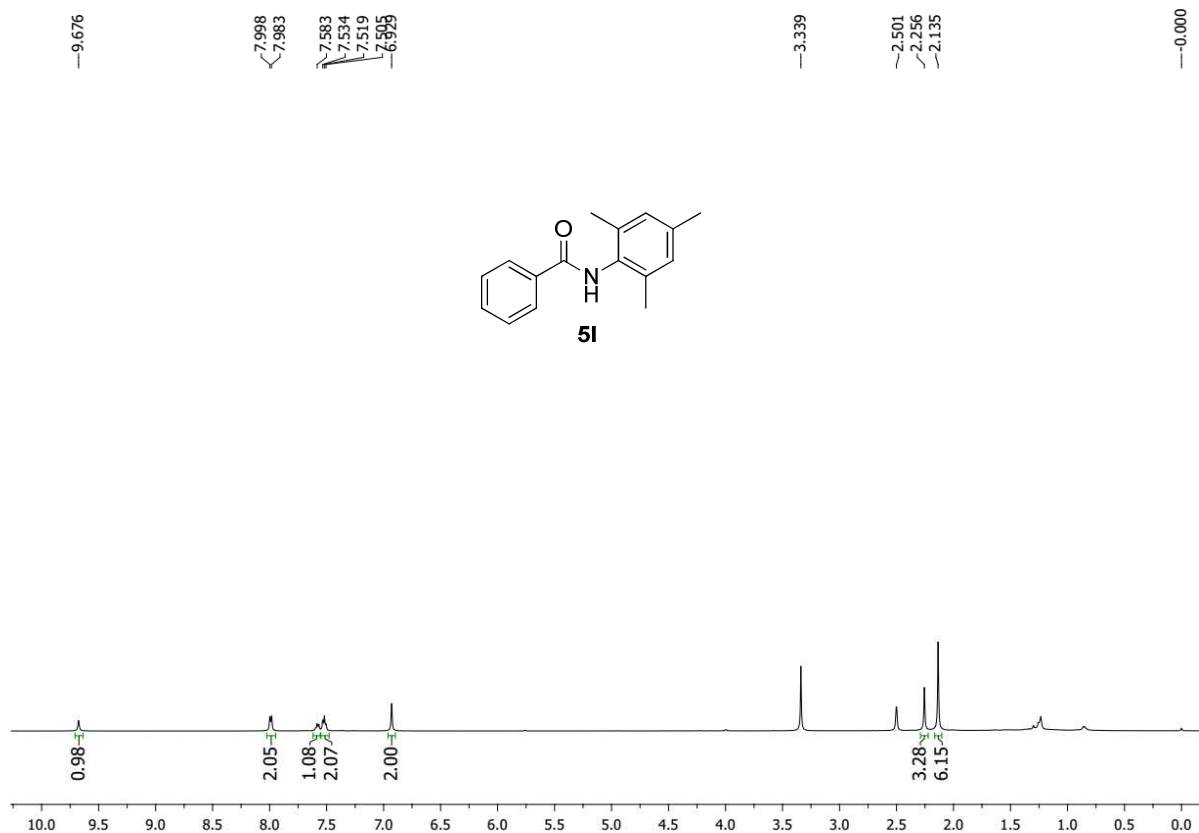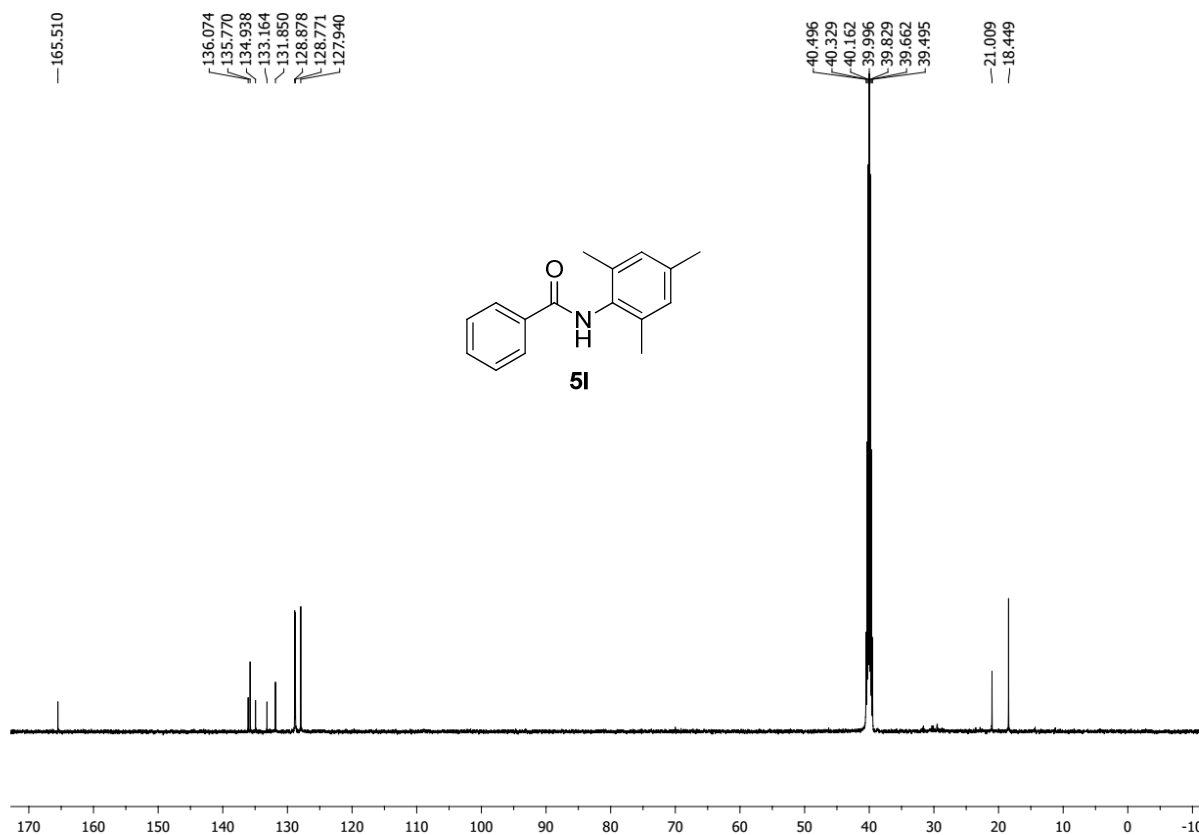

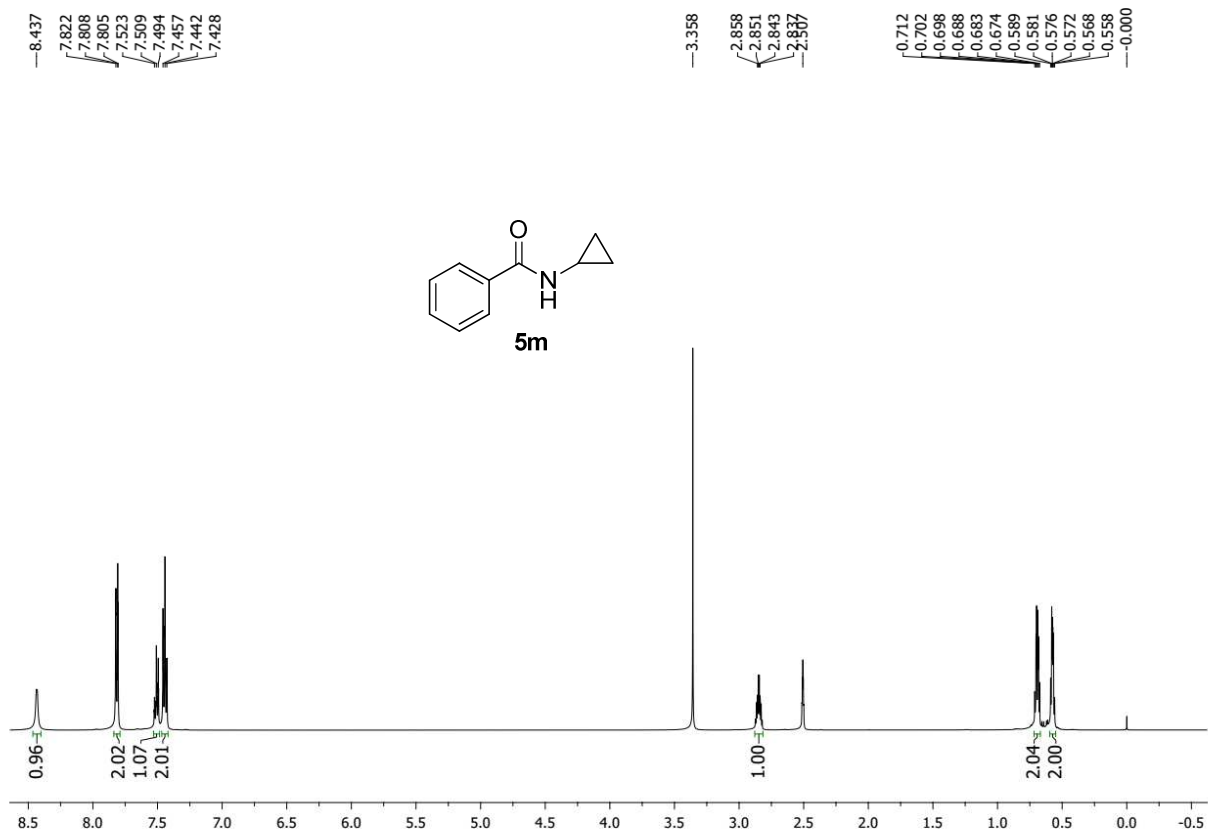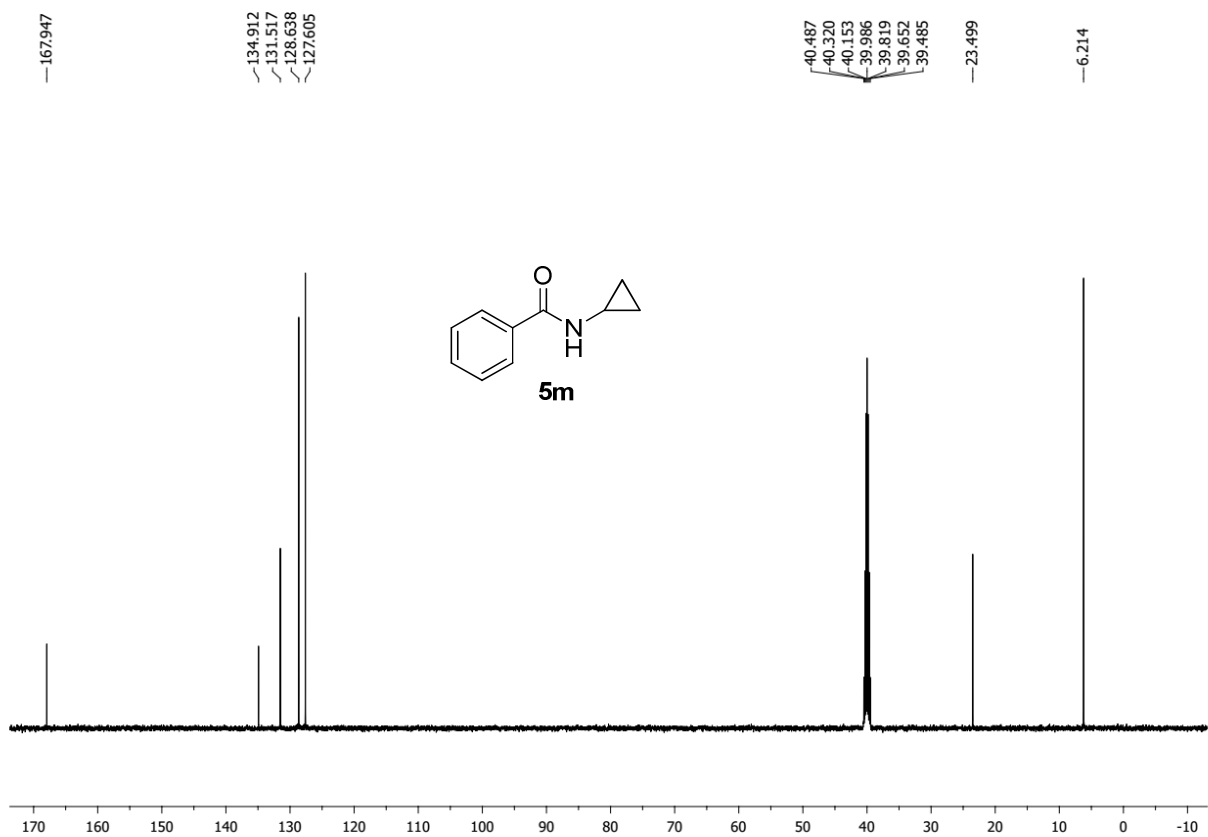

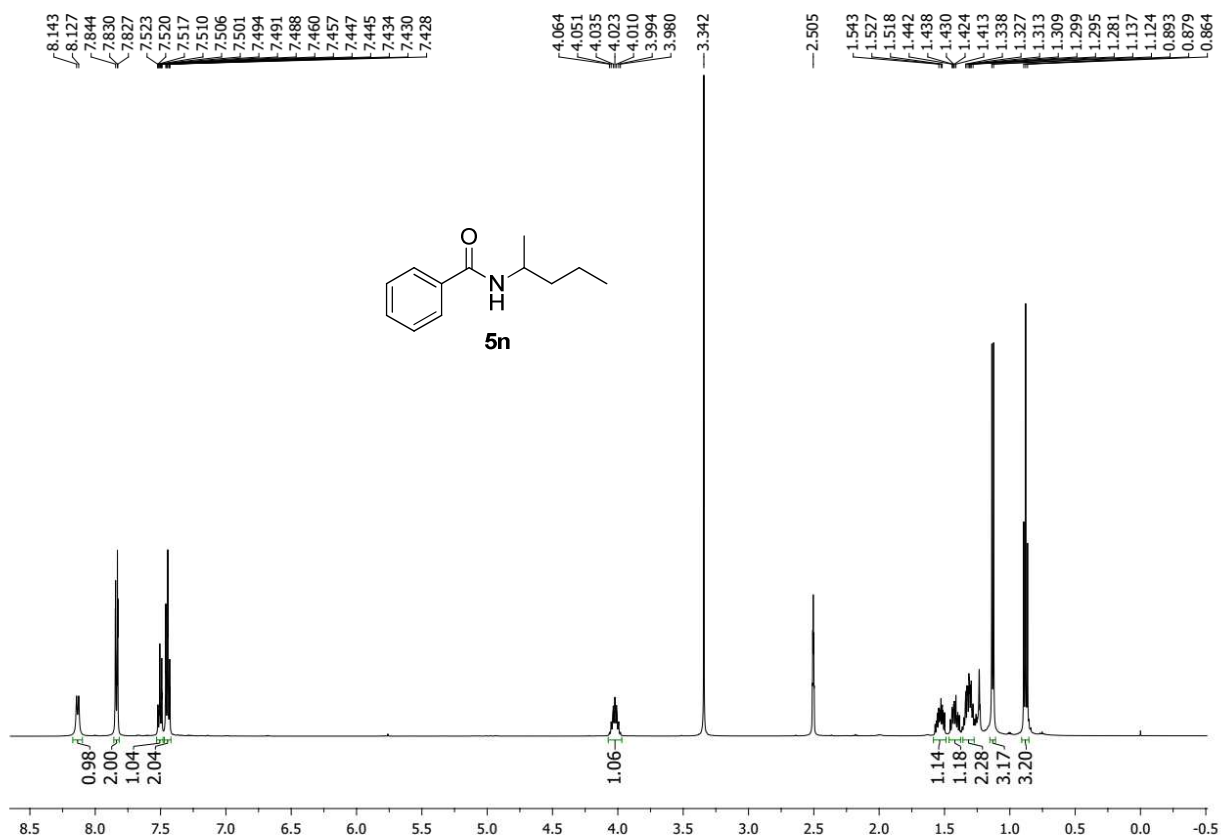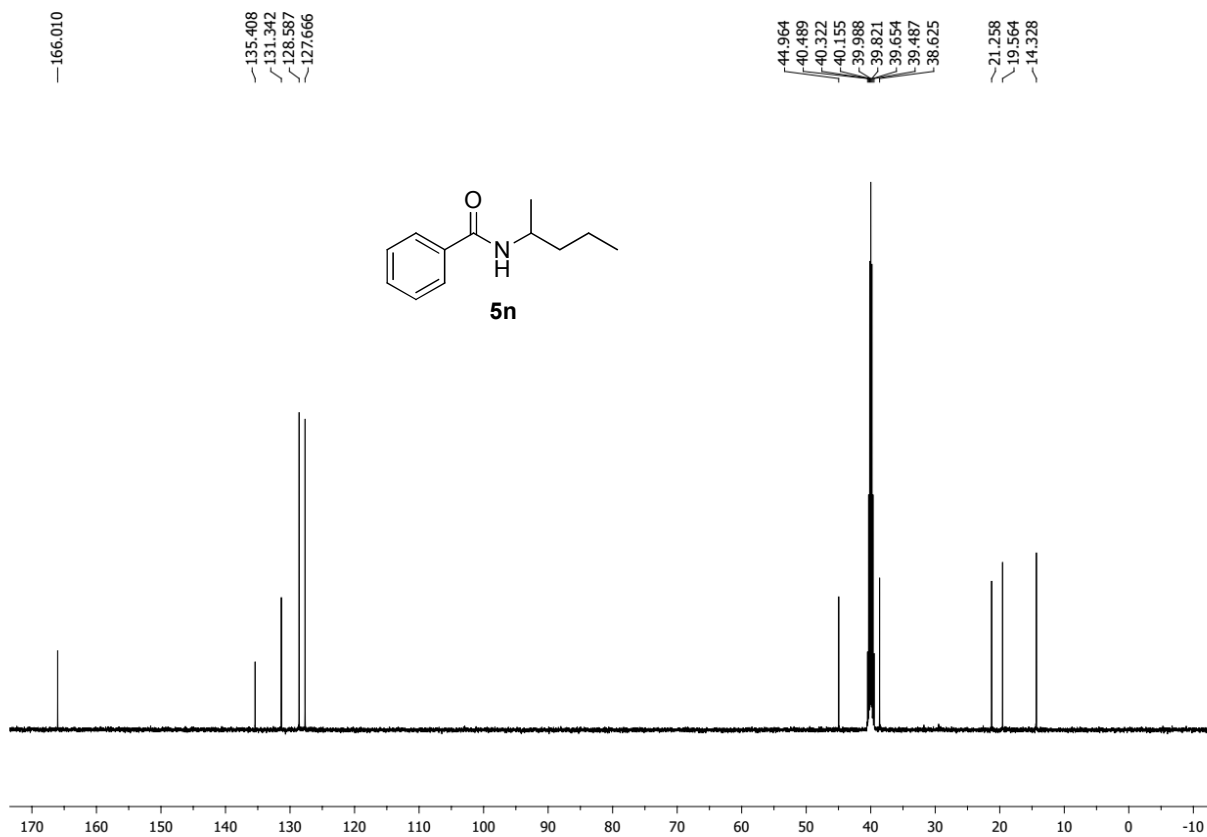

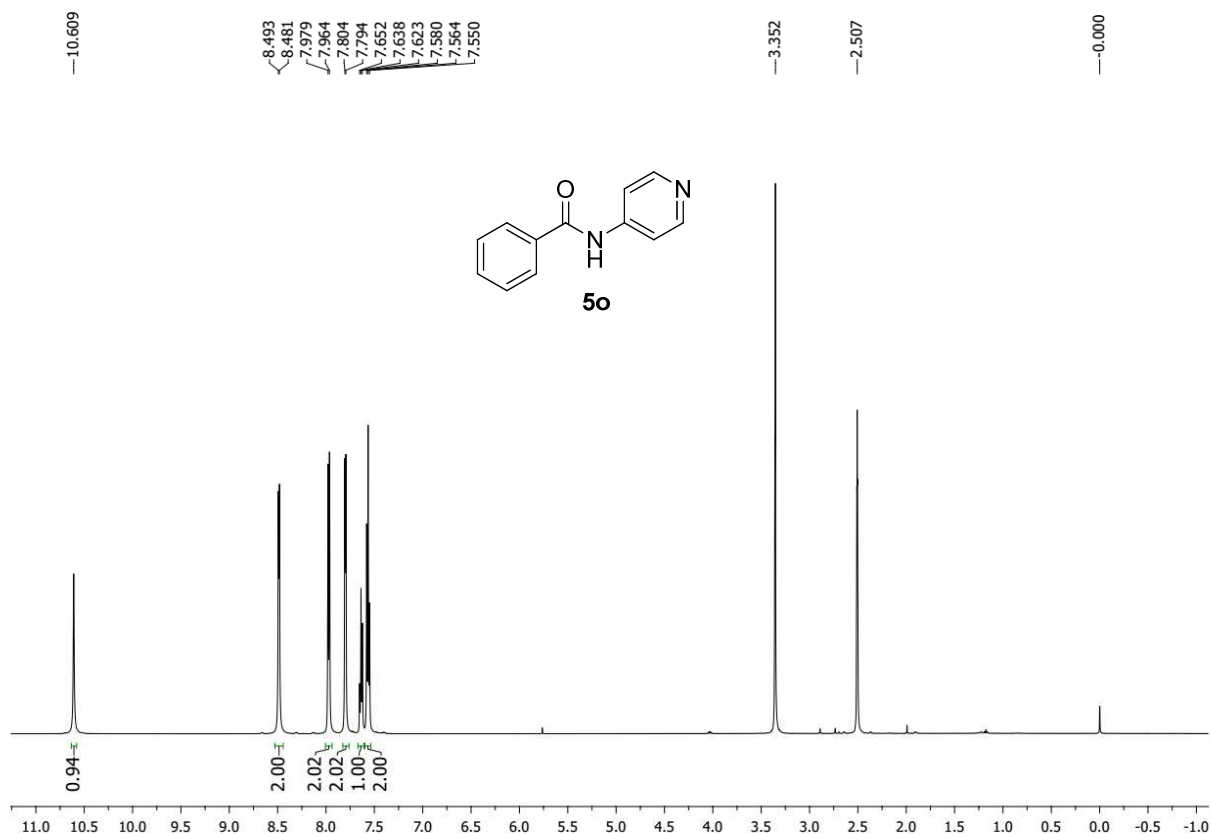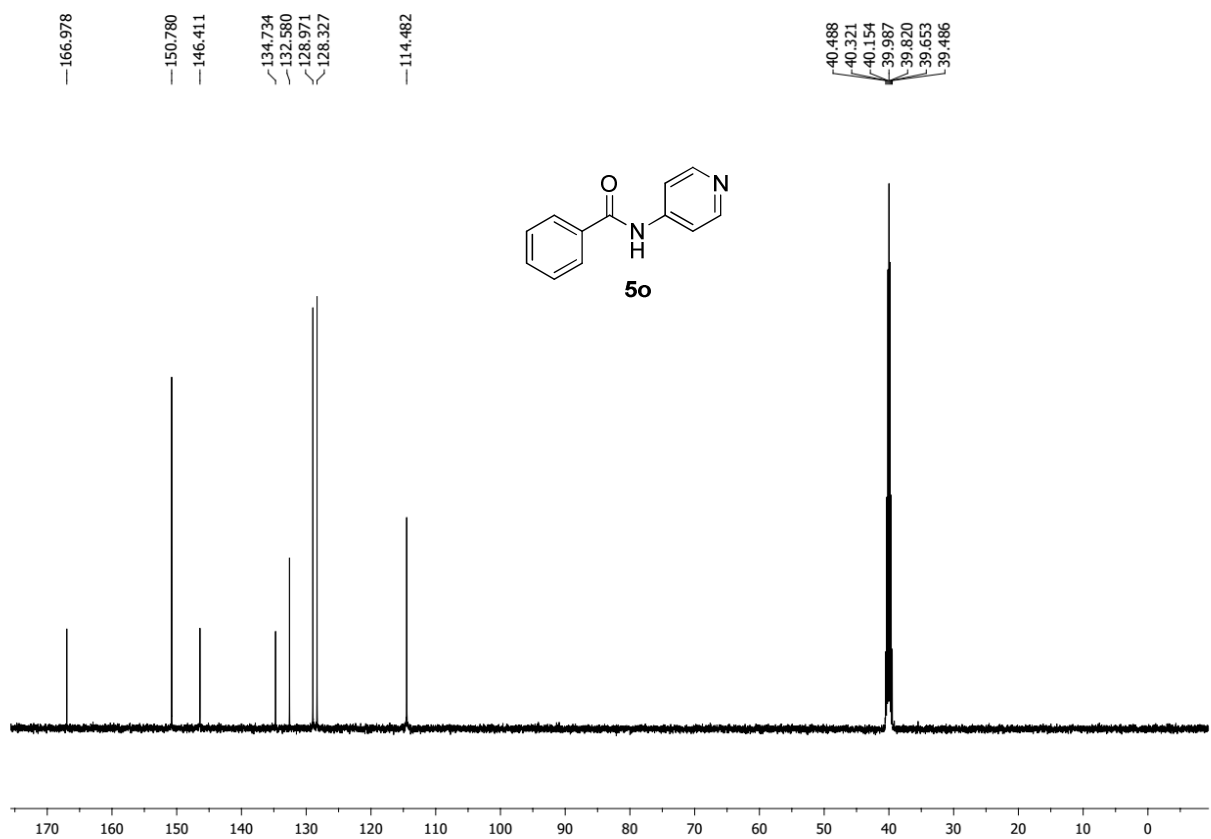

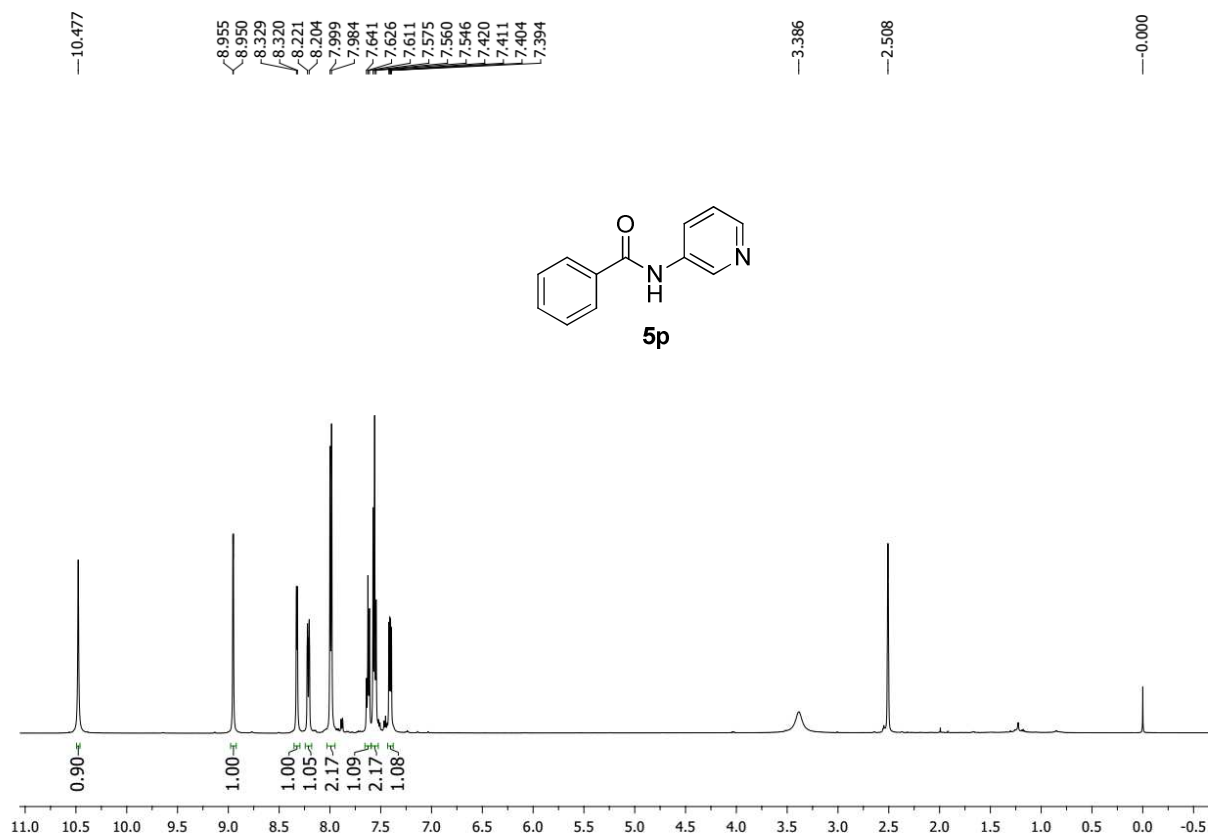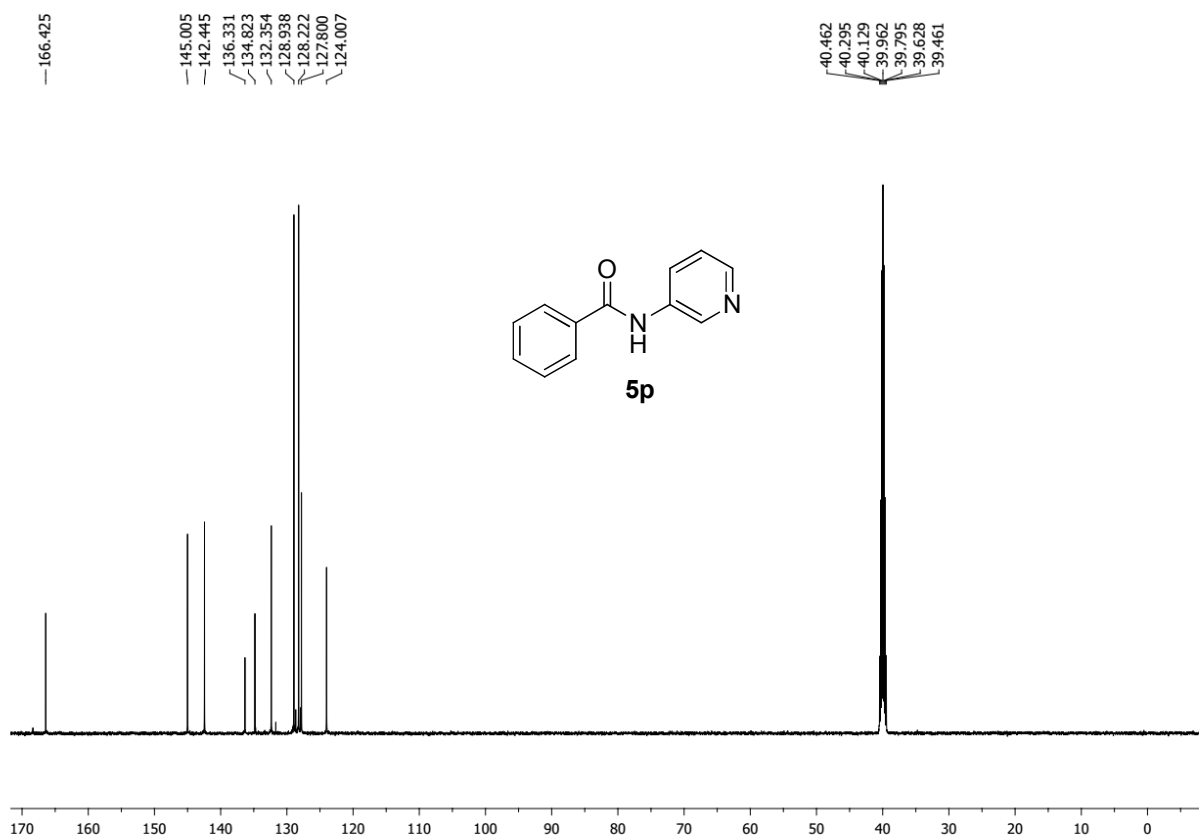

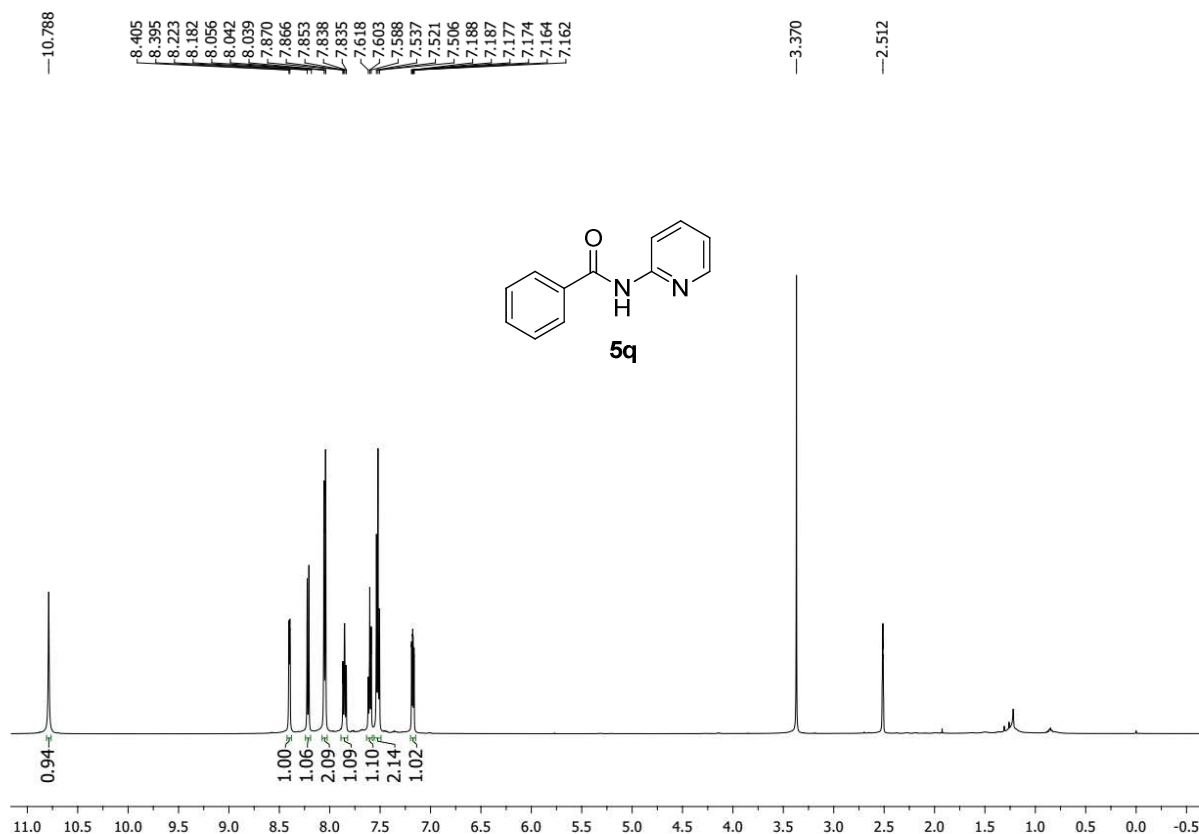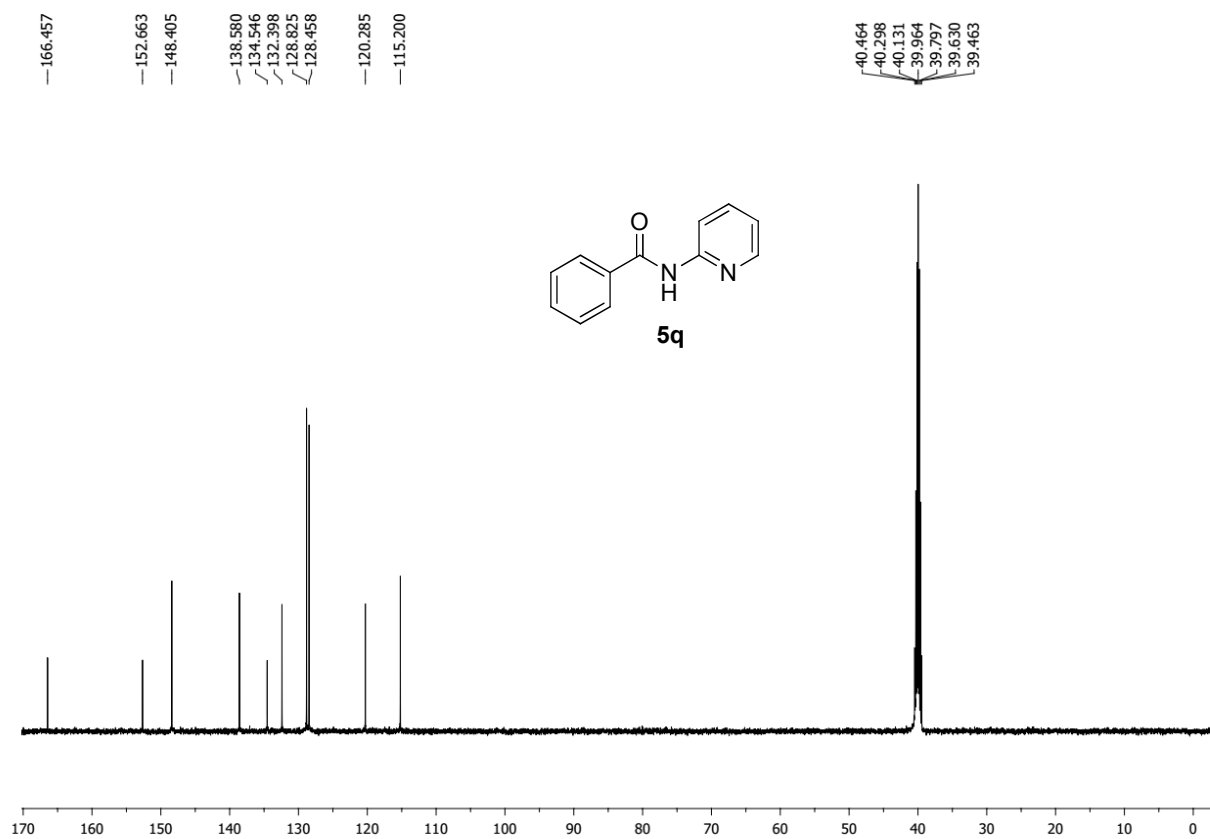

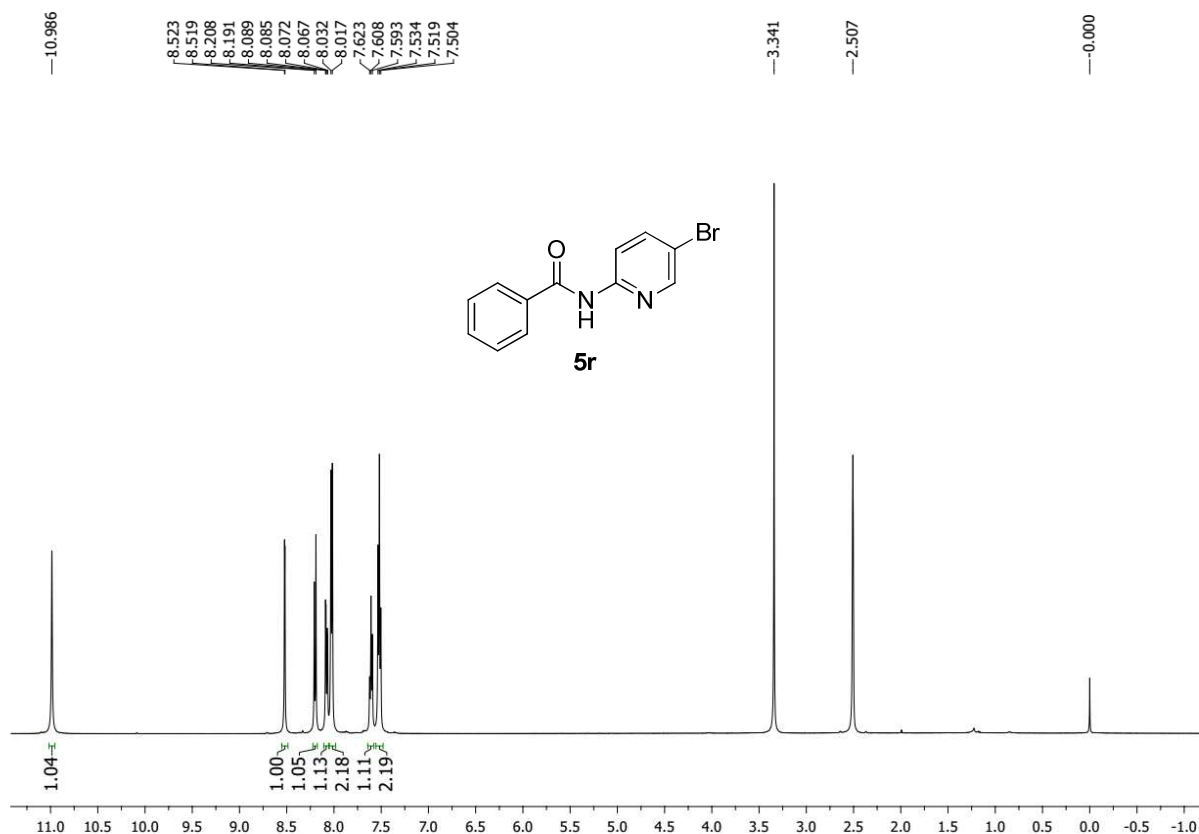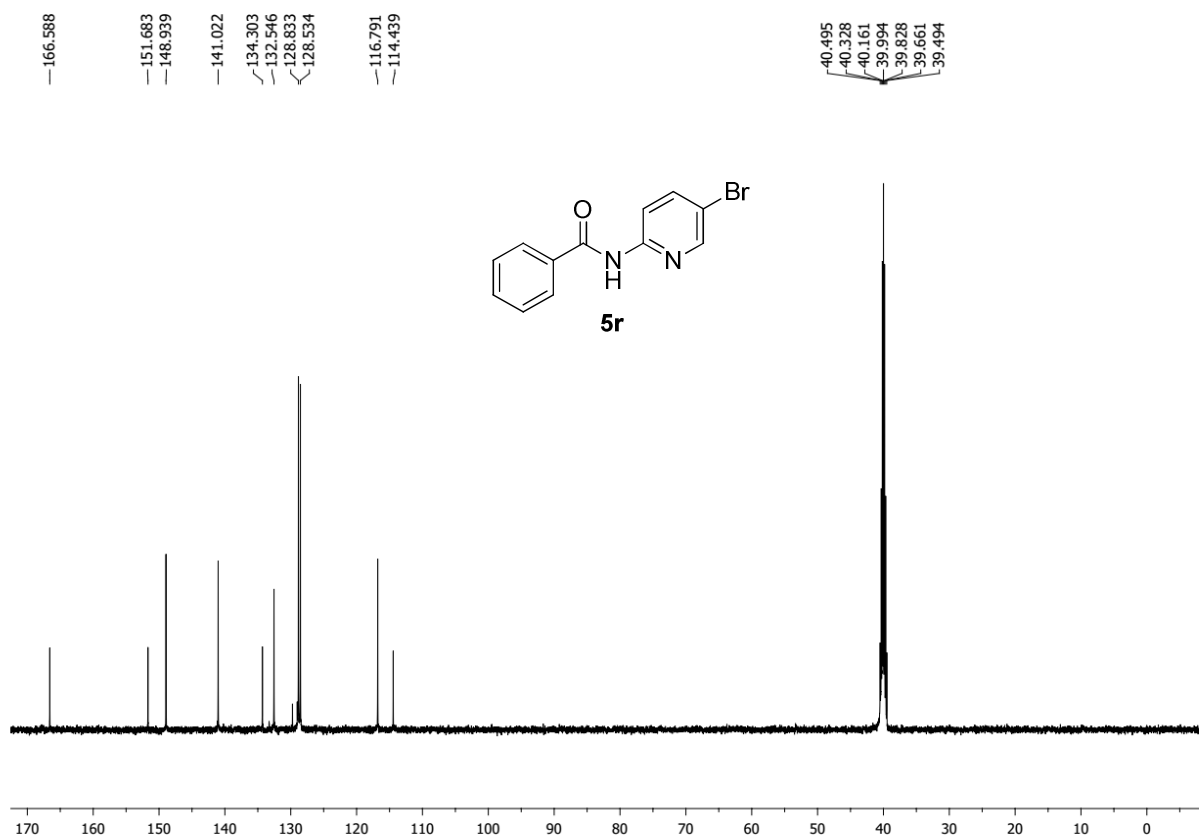

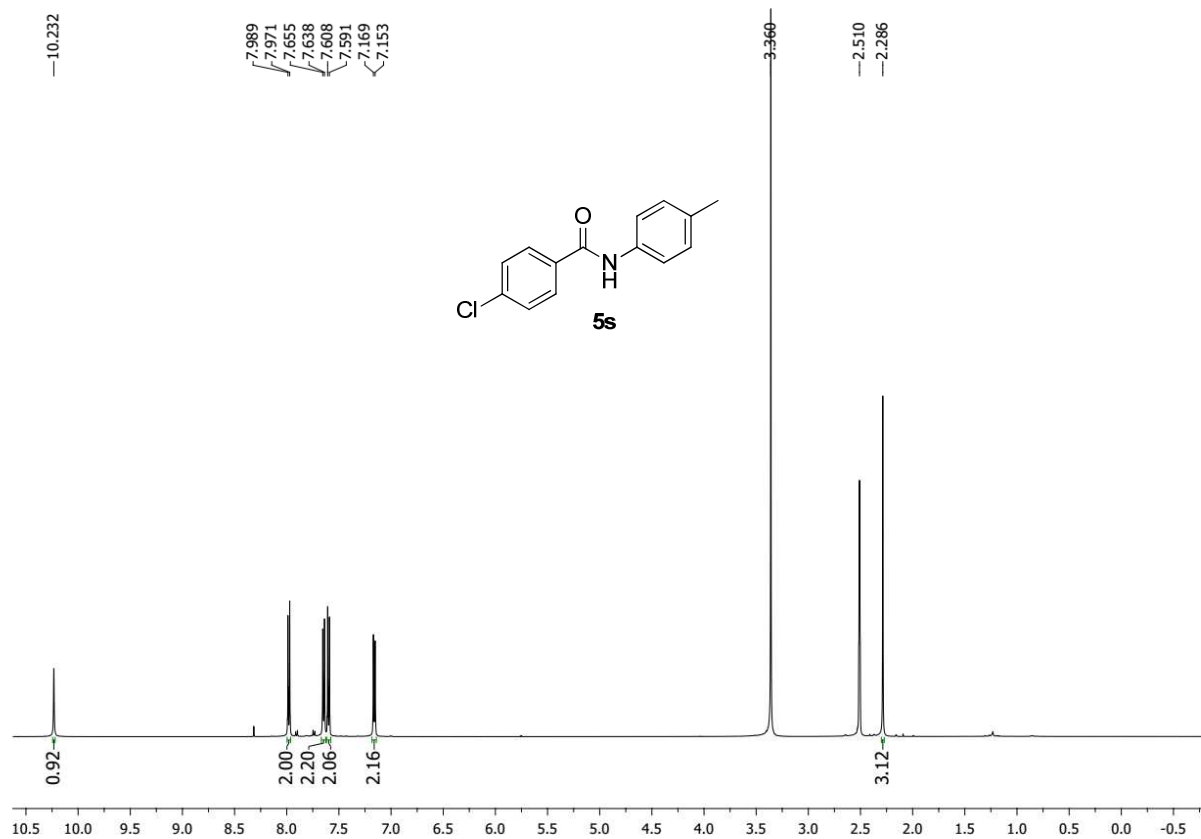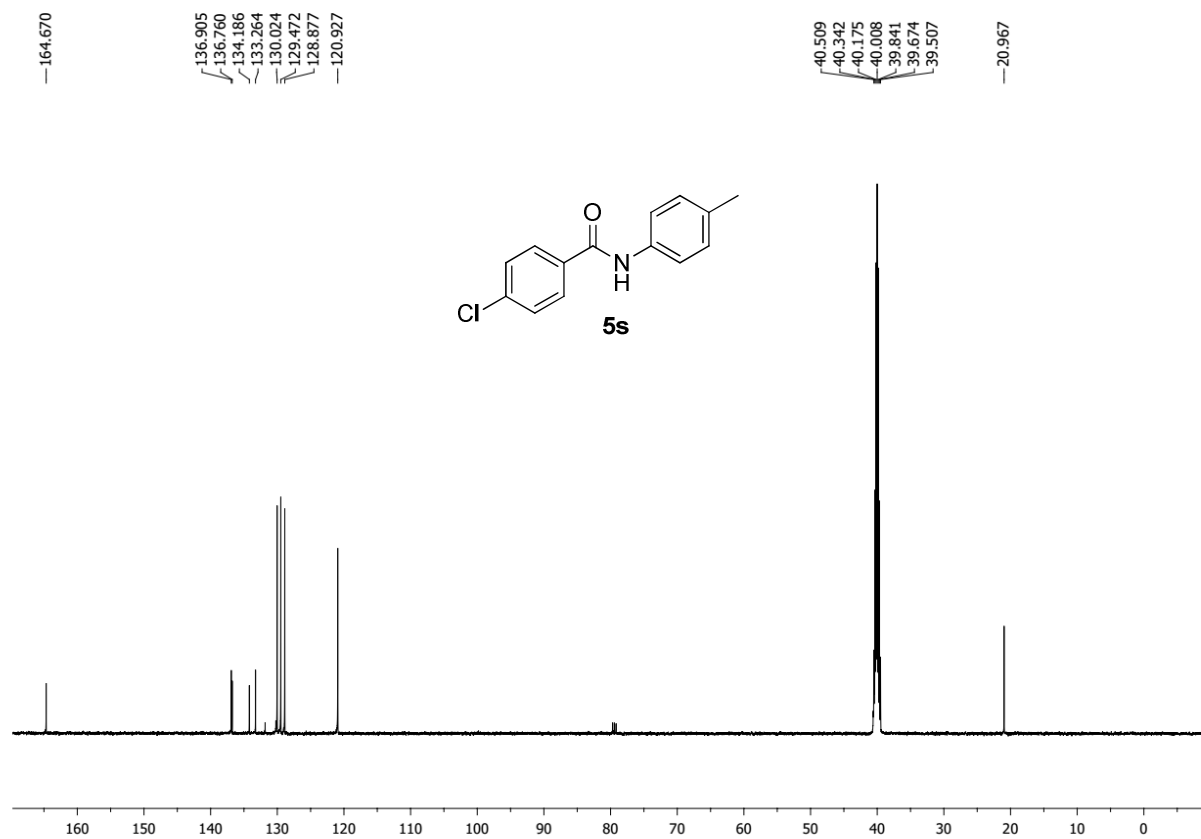



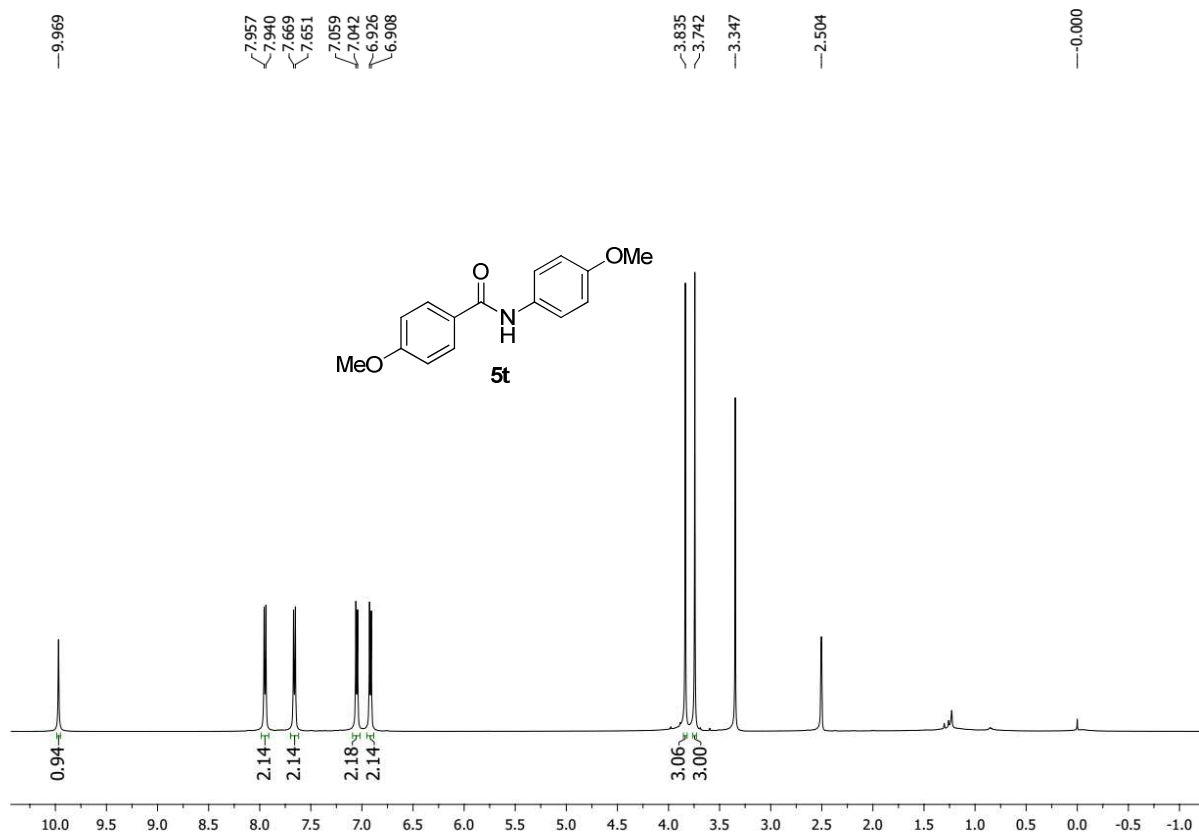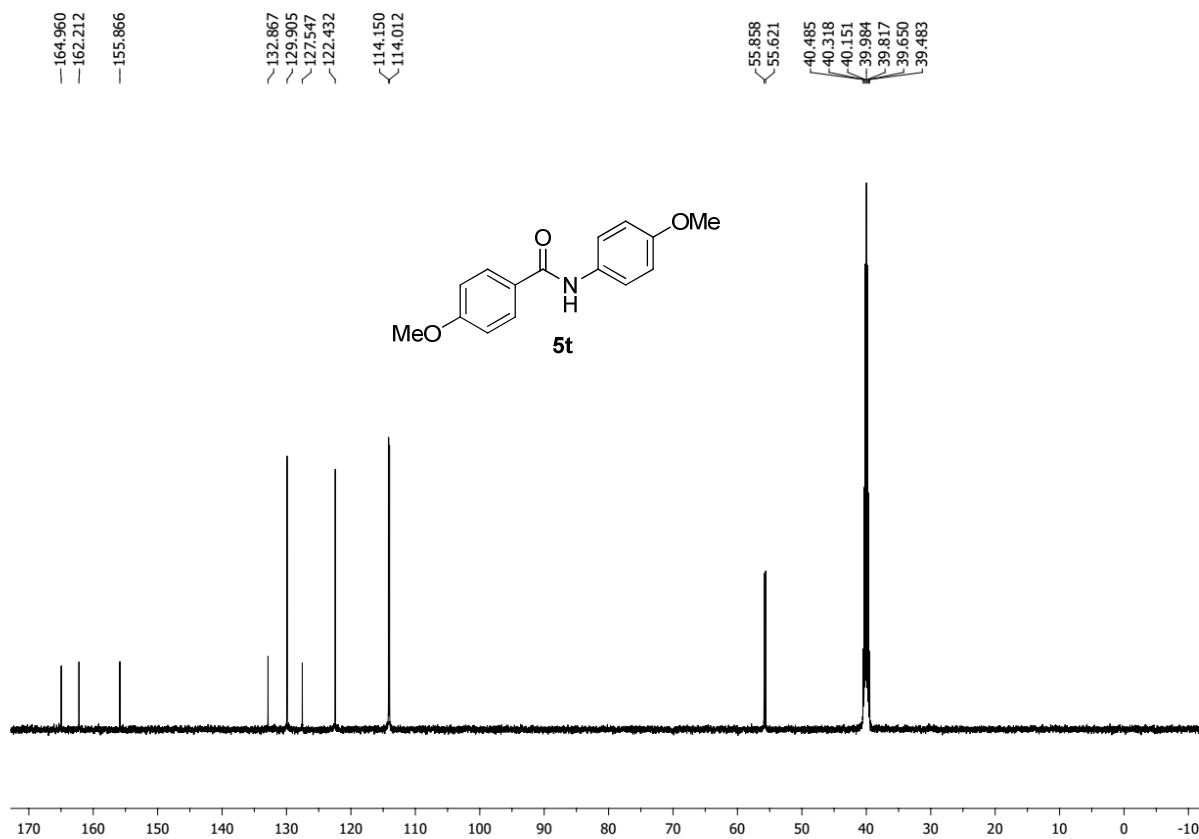

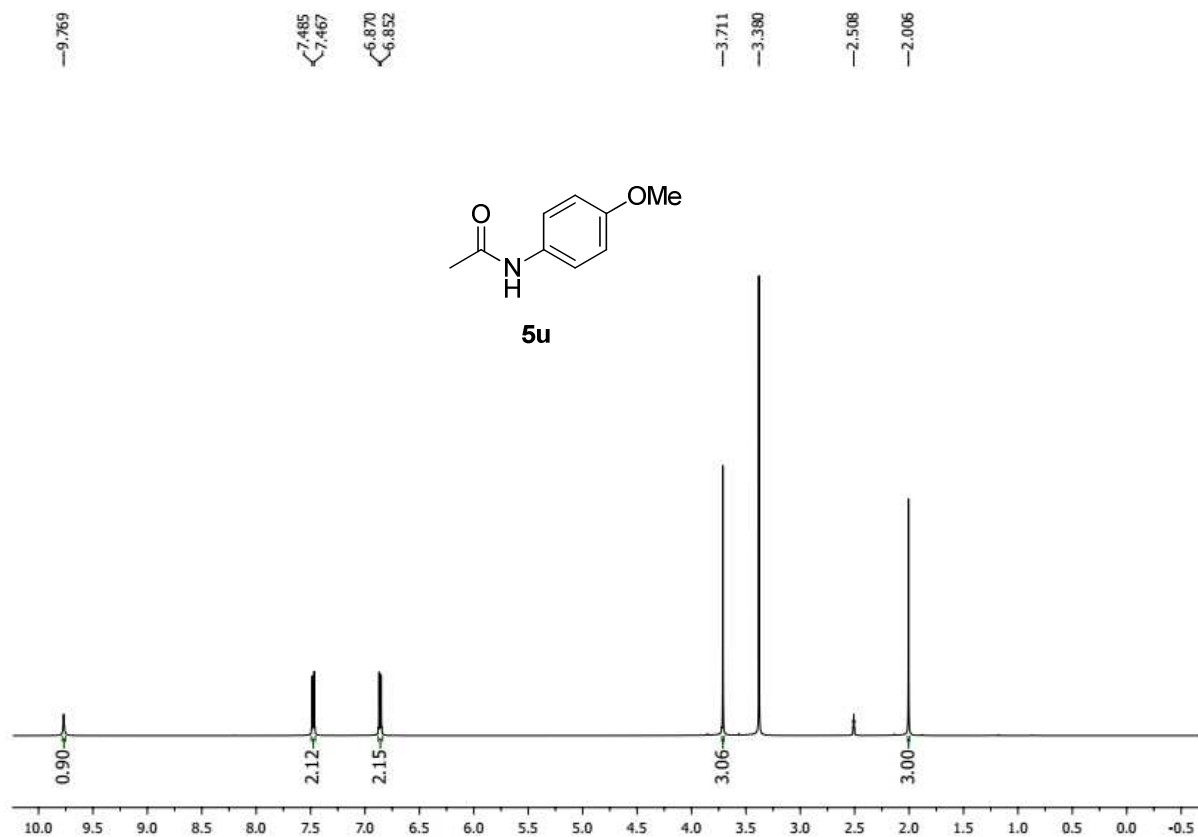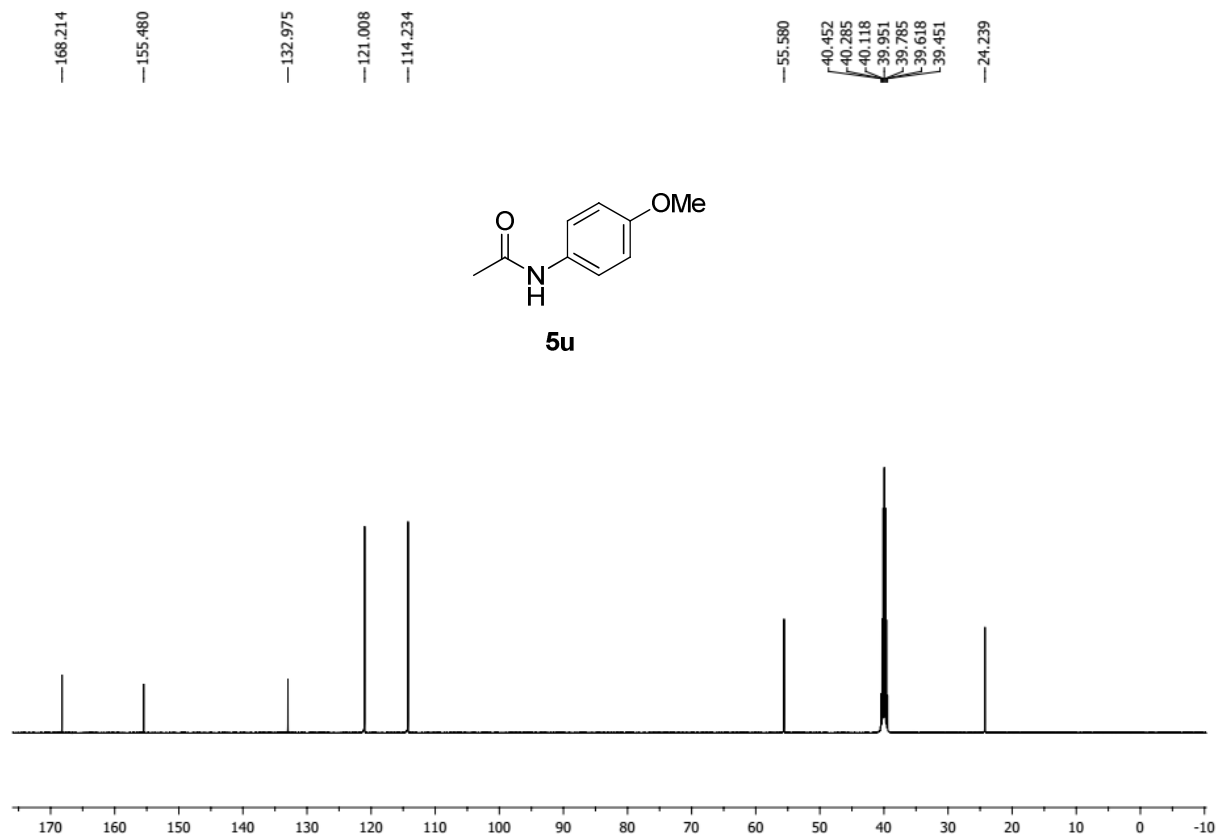

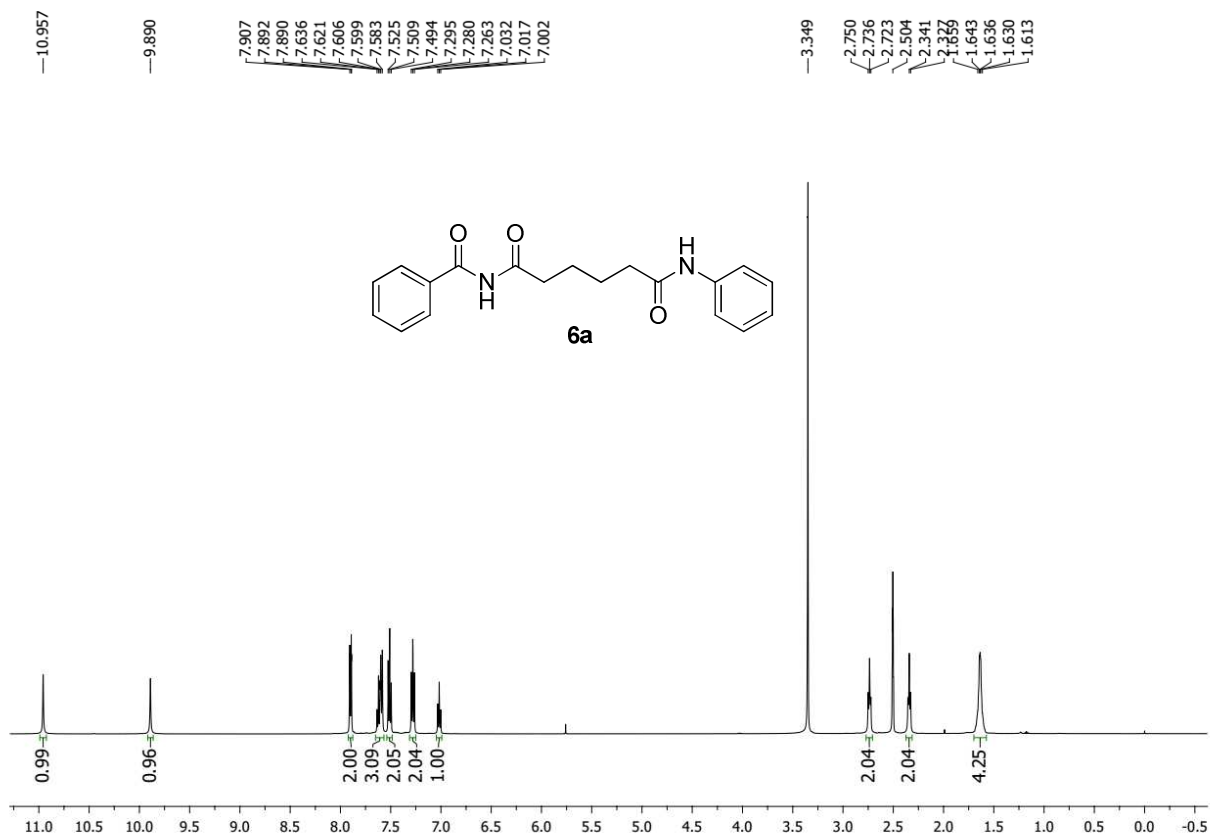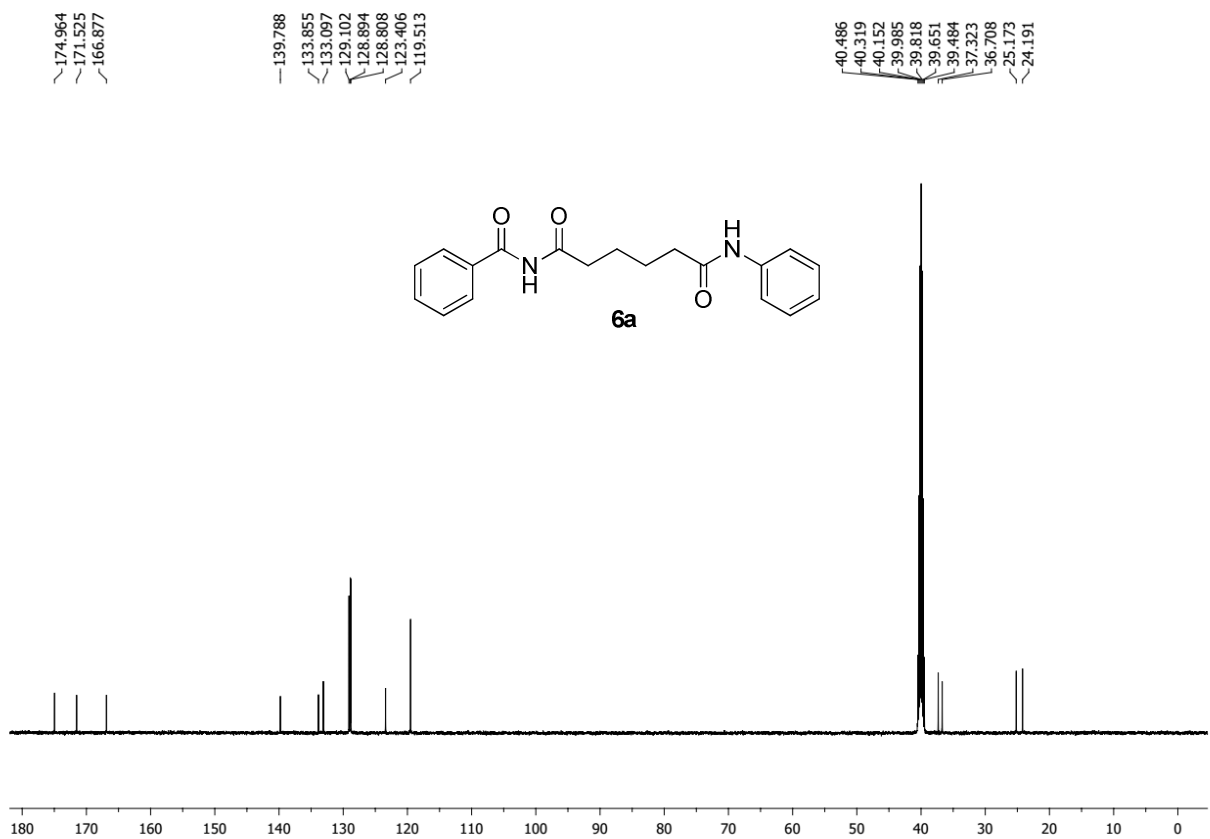

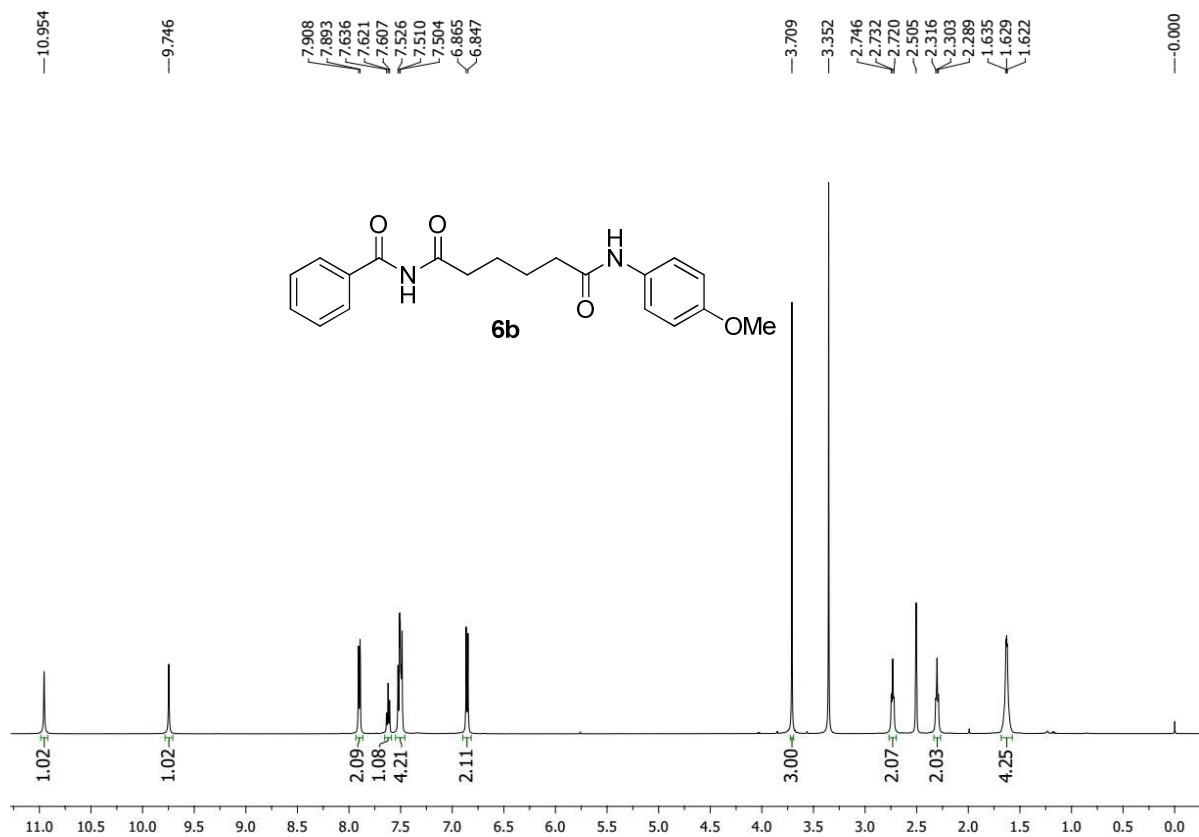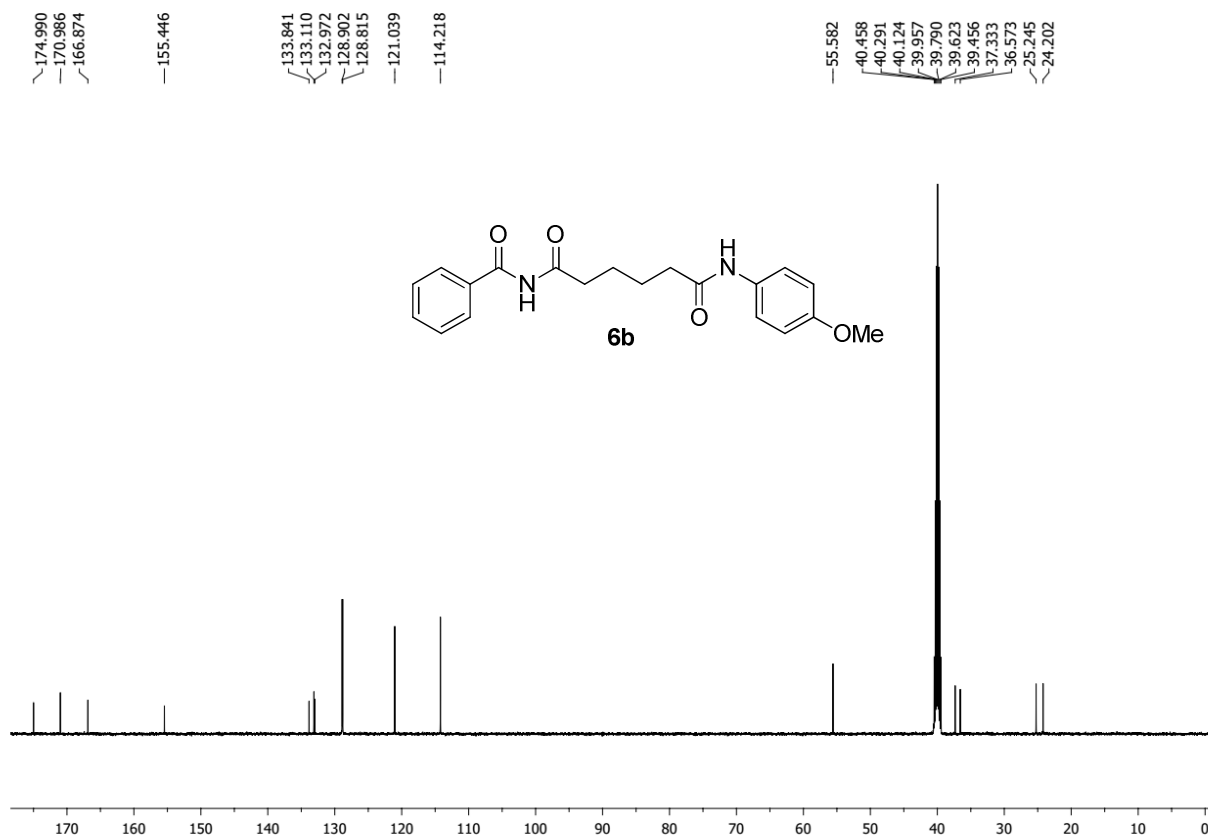

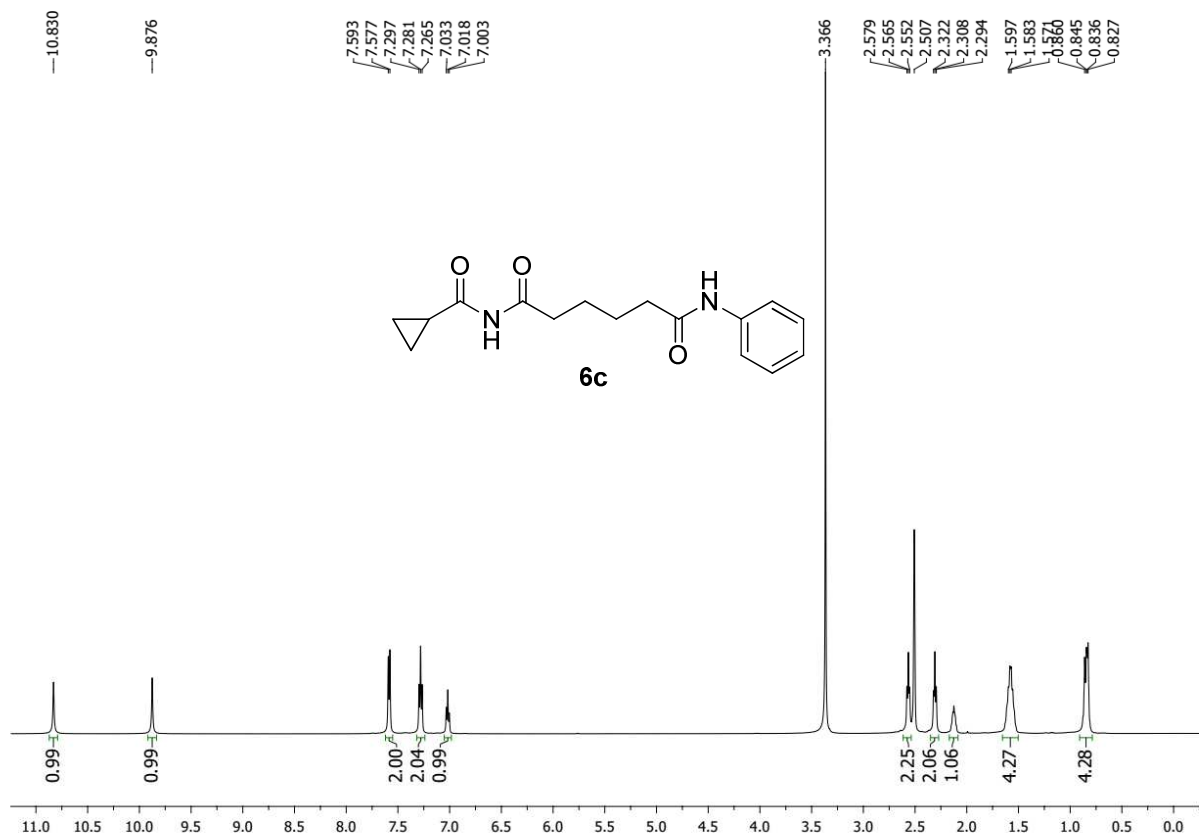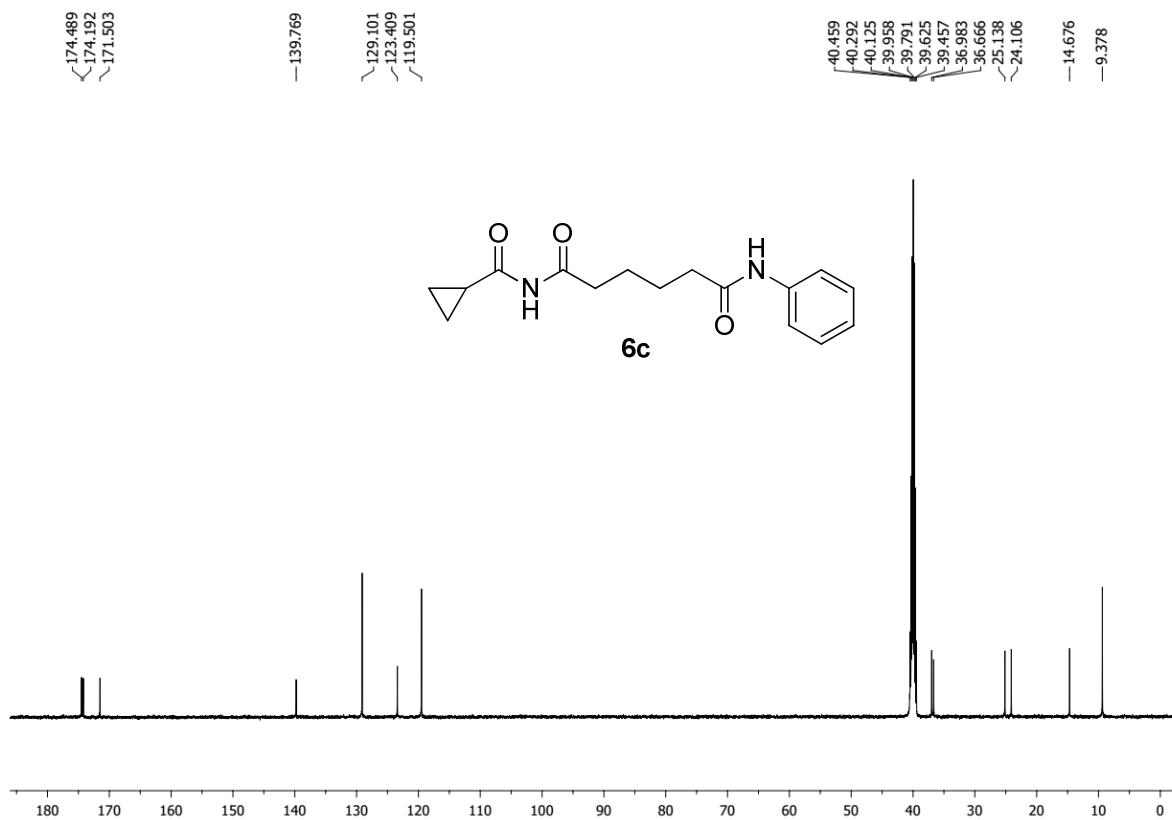

Supplement: Supplementary file 1 [file 8823247]
